# Supplementary material for: Novel Insights on Human Carbonic Anhydrase Inhibitors Based on Coumalic Acid: Design, Synthesis, Molecular Modeling Investigation, and Biological Studies
Source: MDPI journal article supplement (doi:10.3390/ijms23147950), 2022-07-19
Supplement: s1 [file s1]

# Novel Insights on Human Carbonic Anhydrase Inhibitors Based on Coumalic Acid: Design, Synthesis, Molecular Modeling Investigation, and Biological Studies

Virginia Pontecorvi <sup>1</sup>, Mattia Mori <sup>2</sup>, Francesca Picarazzi <sup>2</sup>, Susi Zara <sup>3</sup>, Simone Carradori <sup>3</sup>, Amelia Cataldi <sup>3</sup>, Andrea Angeli <sup>4,5</sup>, Emanuela Berrino <sup>1</sup>, Paola Chimenti <sup>1</sup>, Alessia Ciogli <sup>1</sup>, Daniela Secci <sup>1</sup>, Paolo Guglielmi <sup>1,\*</sup>, Claudiu T. Supuran <sup>4,\*</sup>

\*Corresponding authors: Paolo Guglielmi, Department of Drug Chemistry and Technologies, Sapienza University of Rome, P.le A. Moro 5, 00185 Rome, Italy. E-mail: paolo.guglielmi@uniroma1.it.

Claudiu T. Supuran, NEUROFARBA Department, Pharmaceutical and Nutraceutical Section, University of Florence, via Ugo Schiff 6, 50019 Sesto Fiorentino, FI, Italy. E-mail: claudiu.supuran@unifi.it.

<sup>1</sup> Department of Drug Chemistry and Technologies, Sapienza University of Rome, P.le A. Moro 5, 00185 Rome, Italy; virginia.pontecorvi@uniroma1.it (V.P.); emanuela.berrino@uniroma1.it (E.B.); paola.chimenti@uniroma1.it (P.C.); alessia.ciogli@uniroma1.it (A.C.); daniela.secci@uniroma1.it (D.S.); paolo.guglielmi@uniroma1.it (P.G.);

<sup>2</sup> Department of Biotechnology, Chemistry and Pharmacy, University of Siena, Via Aldo Moro 2, 53100 Siena, Italy; mattia.mori@unisi.it (M.M.); francesc.picarazzi@student.unisi.it (F.P.)

<sup>3</sup> Department of Pharmacy, "G. d'Annunzio" University of Chieti-Pescara, Via dei Vestini 31, 66100 Chieti, Italy; susi.zara@unich.it (S.Z.); simone.carradori@unich.it (S.C.); amelia.cataldi@unich.it (A.C.);

<sup>4</sup> NEUROFARBA Department, Pharmaceutical and Nutraceutical Section, University of Florence, via Ugo Schiff 6, 50019 Sesto Fiorentino, FI, Italy; andrea.angeli@unifi.it (A.A.); claudiu.supuran@unifi.it (C.T.S.)

<sup>5</sup> Department of Food and Drug, University of Parma, Parco Area delle Scienze, 27/A, 43124 Parma, Italy; andrea.angeli@unifi.it (A.A.);

\* Correspondence: paolo.guglielmi@uniroma1.it (P.G.); claudiu.supuran@unifi.it (C.T.S.);

## Table of Contents

|                                                                              |           |
|------------------------------------------------------------------------------|-----------|
| <b>Figure S1.</b> Overimposition between hCA IX and acetazolamide complexes. | (S3)      |
| NMR spectra of compounds <b>2-15</b>                                         | (S4–S39)  |
| <b>Figure S2.</b> HPLC chromatograms for purity determination                | (S40)     |
| Enzyme inhibition curves of compounds <b>2-15</b>                            | (S41–S43) |
| <b>Table S1.</b> Instrument parameters for exact mass determination          | (S44)     |
| <b>Table S2.</b> Purification conditions for compounds <b>2-15</b>           | (S45–S46) |
| High resolution mass analysis of compounds <b>7, 9, 11, 12, 13, 14</b>       | (S47–S52) |



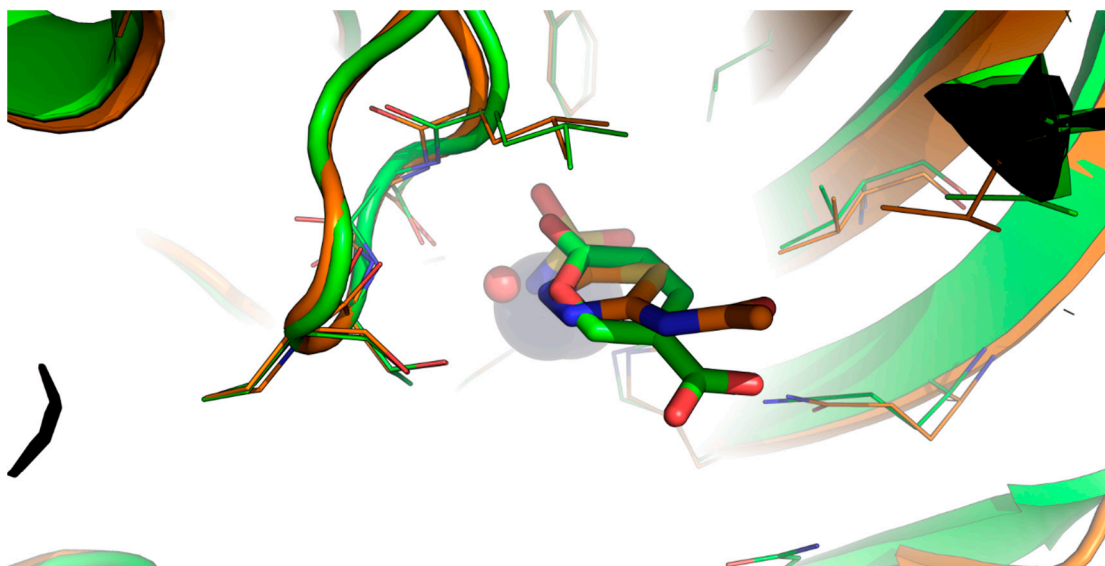

**Figure S1.** Overimposition between the crystallographic complex between hCA IX and acetazolamide (coloured orange) and the MD-representative structure of the complex between **1** (in its closed form) and hCA IX, which is coloured green. Residues within 4 Å from the ligands are shown as lines. The Zn(II)-bound water molecule in the MD structure is shown as a small red sphere, the catalytic Zn(II) ion is shown as a grey sphere in both structures.

$^1\text{H}$  NMR spectrum of compound **2**

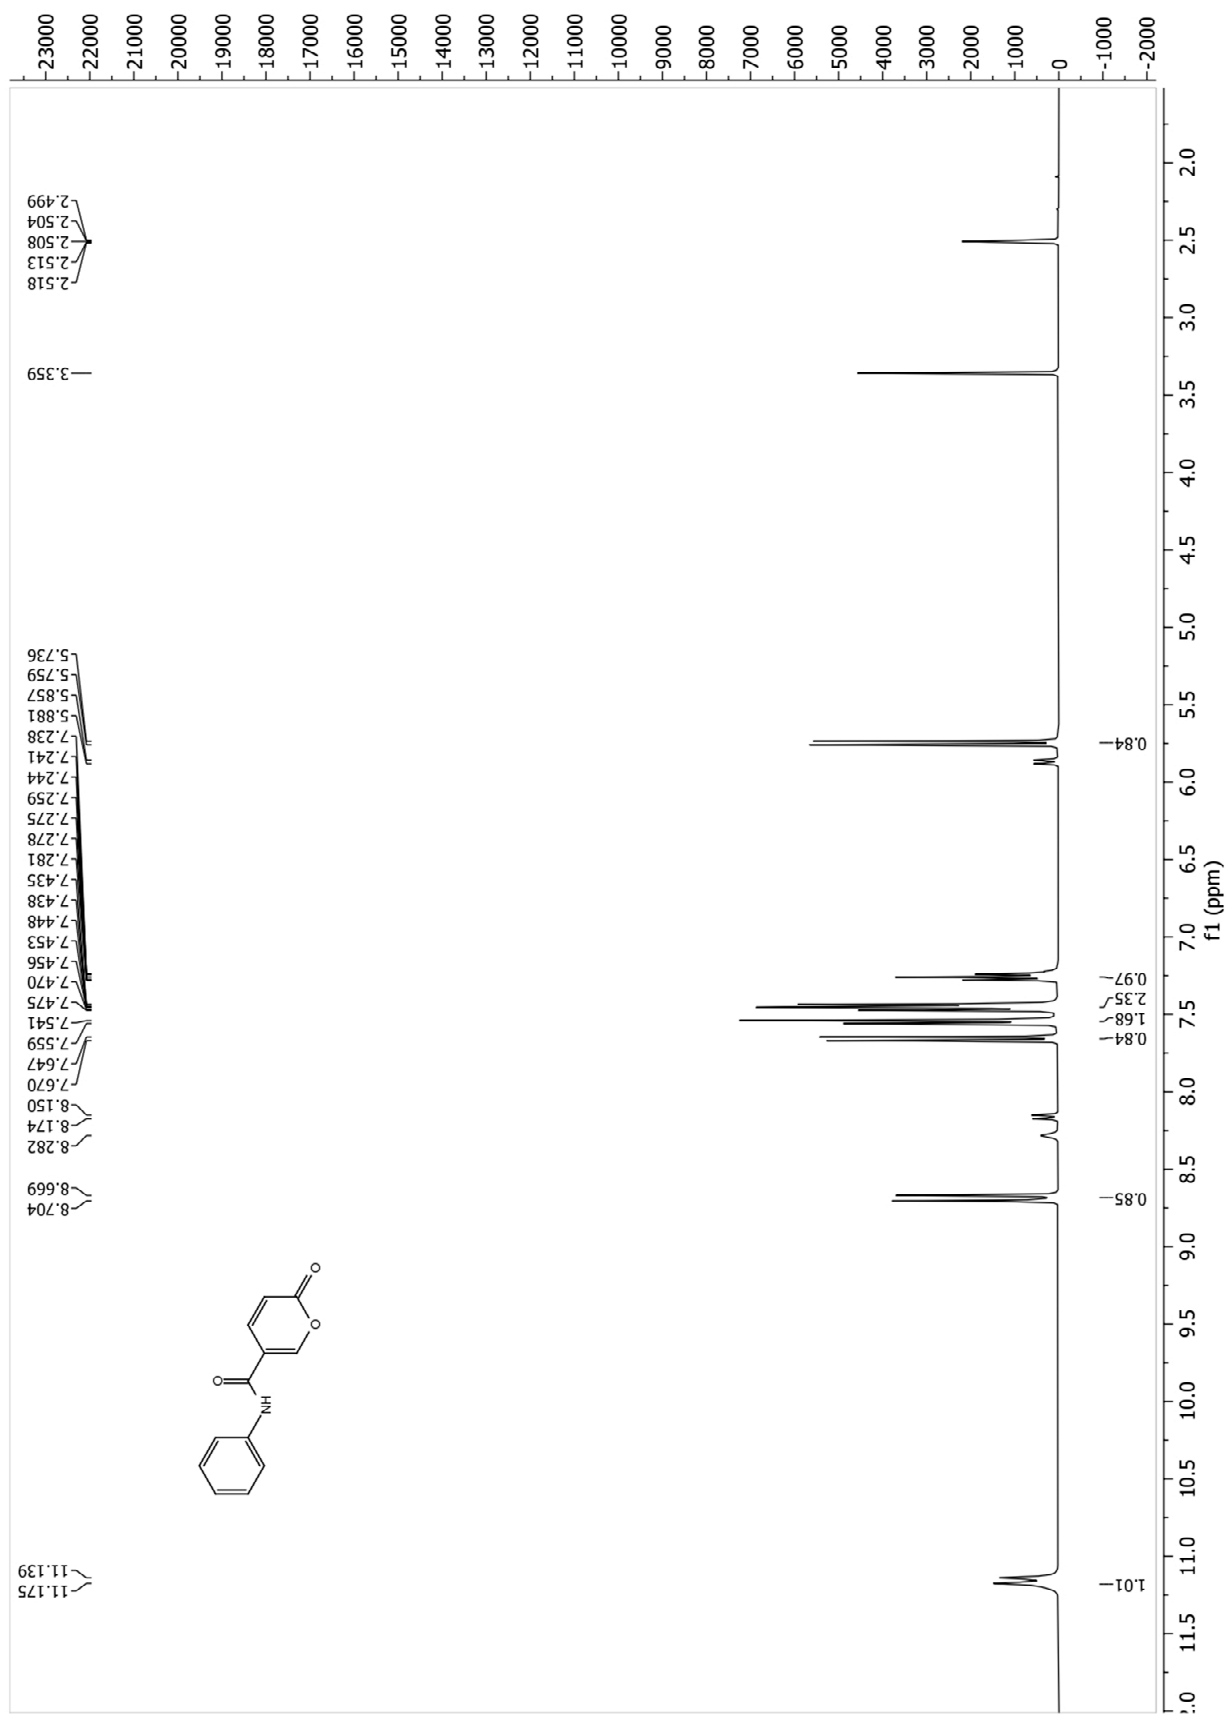

$^{13}\text{C}$  NMR spectrum of compound **2**

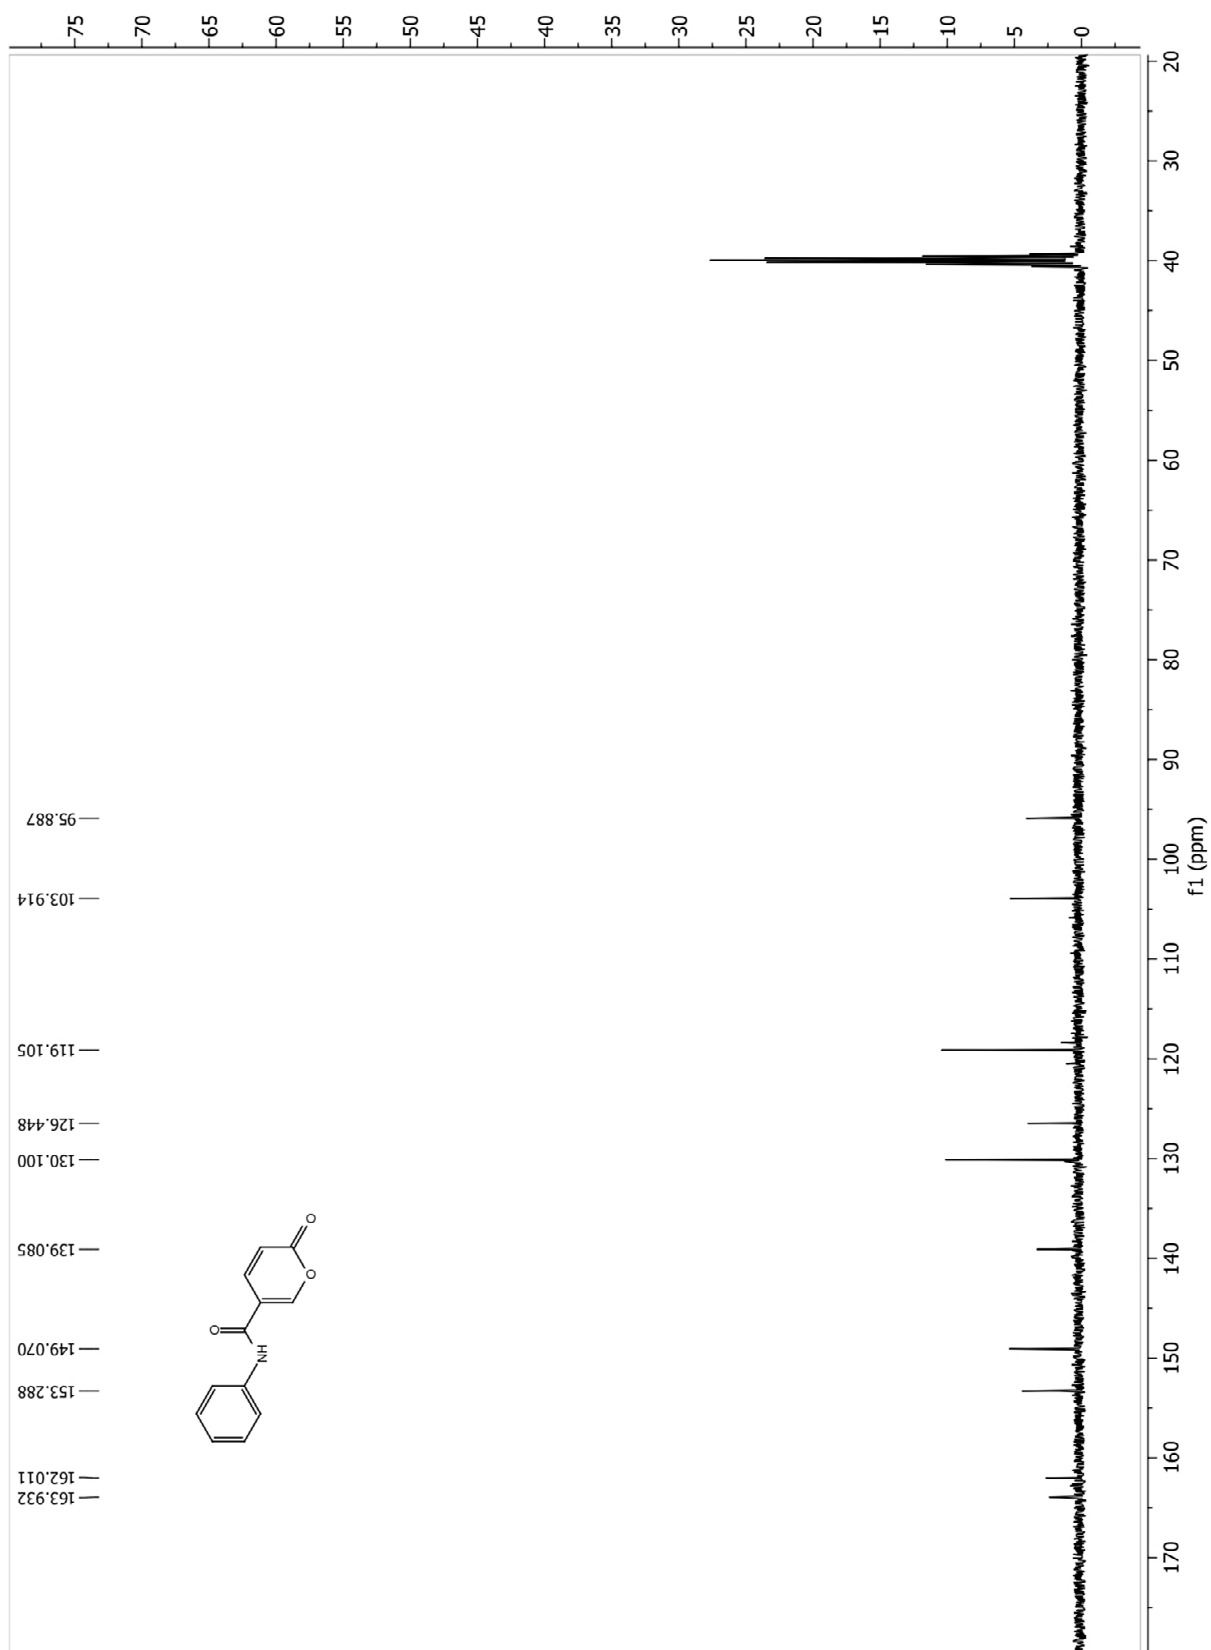

$^1\text{H}$  NMR spectrum of compound **3**

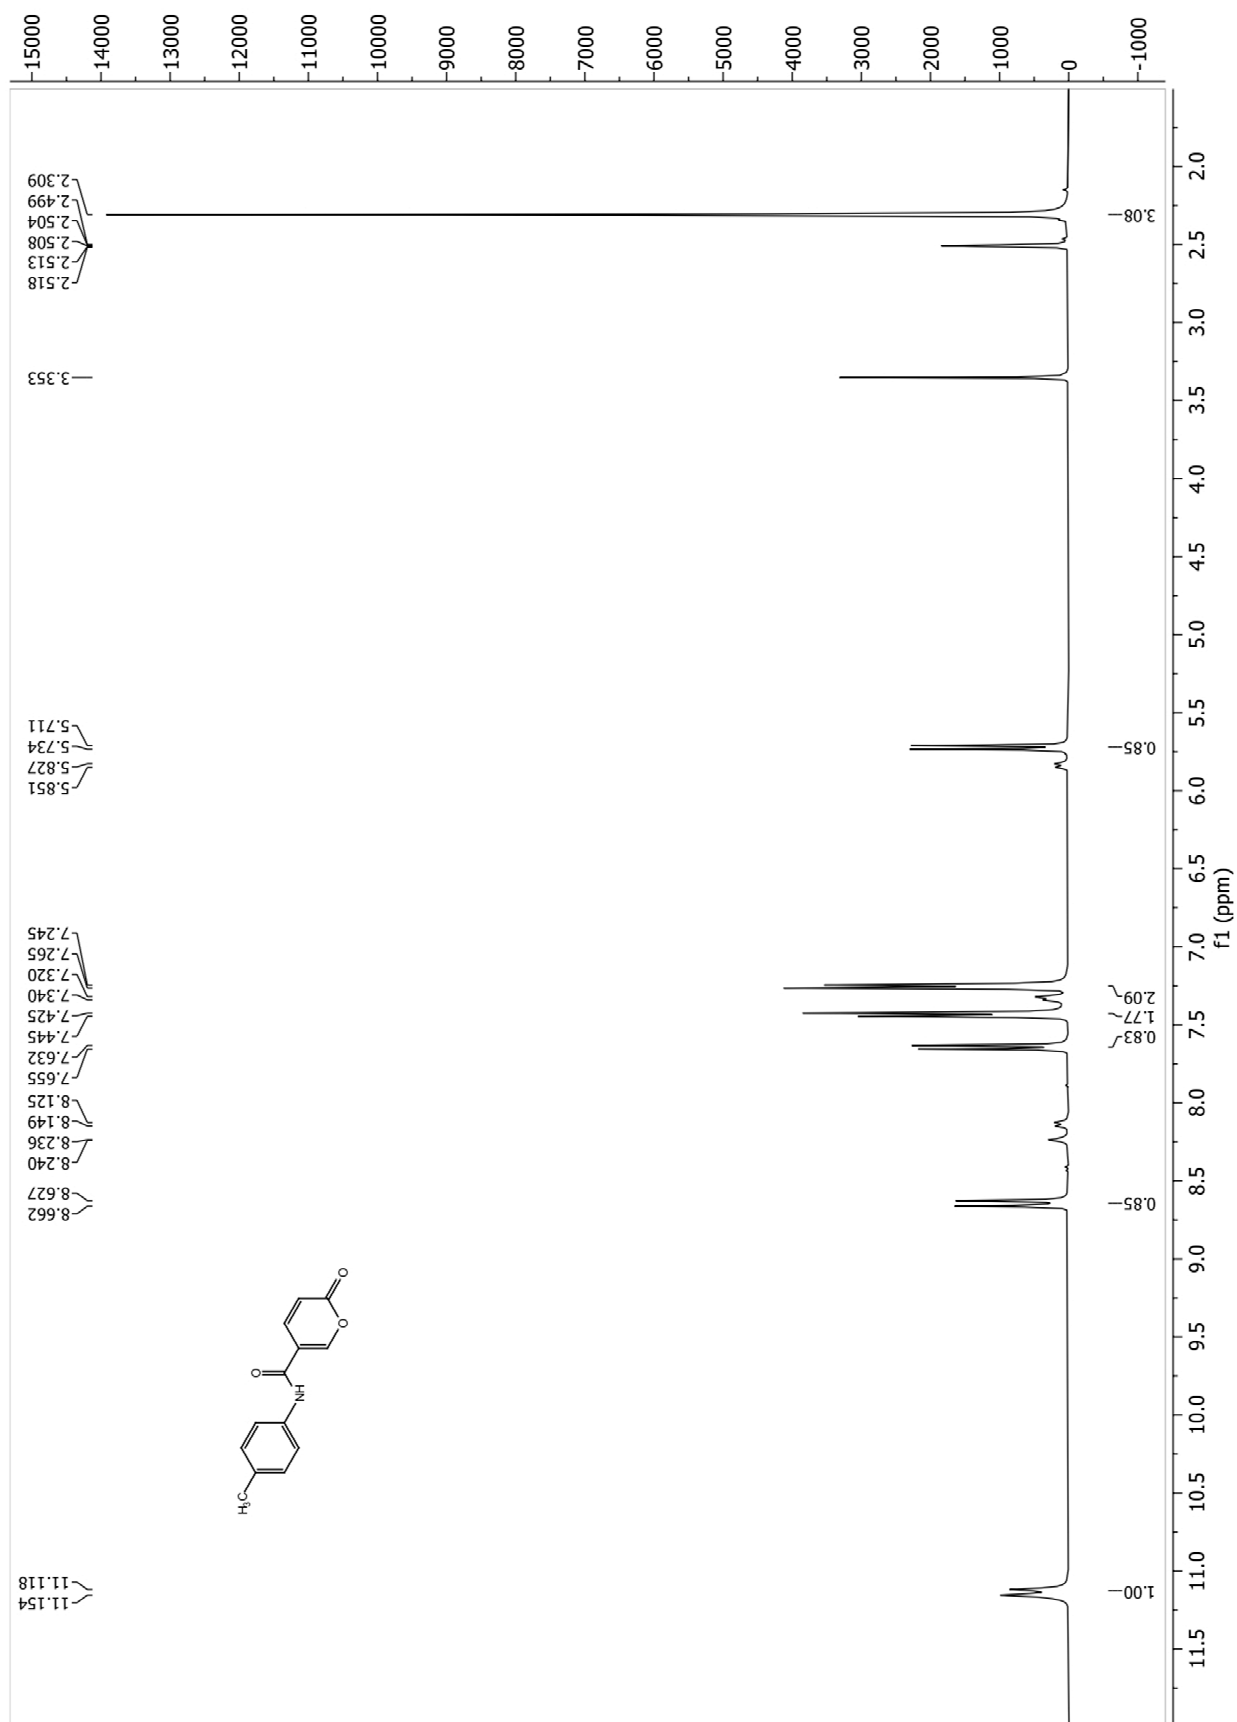

$^{13}\text{C}$  NMR spectrum of compound **3**

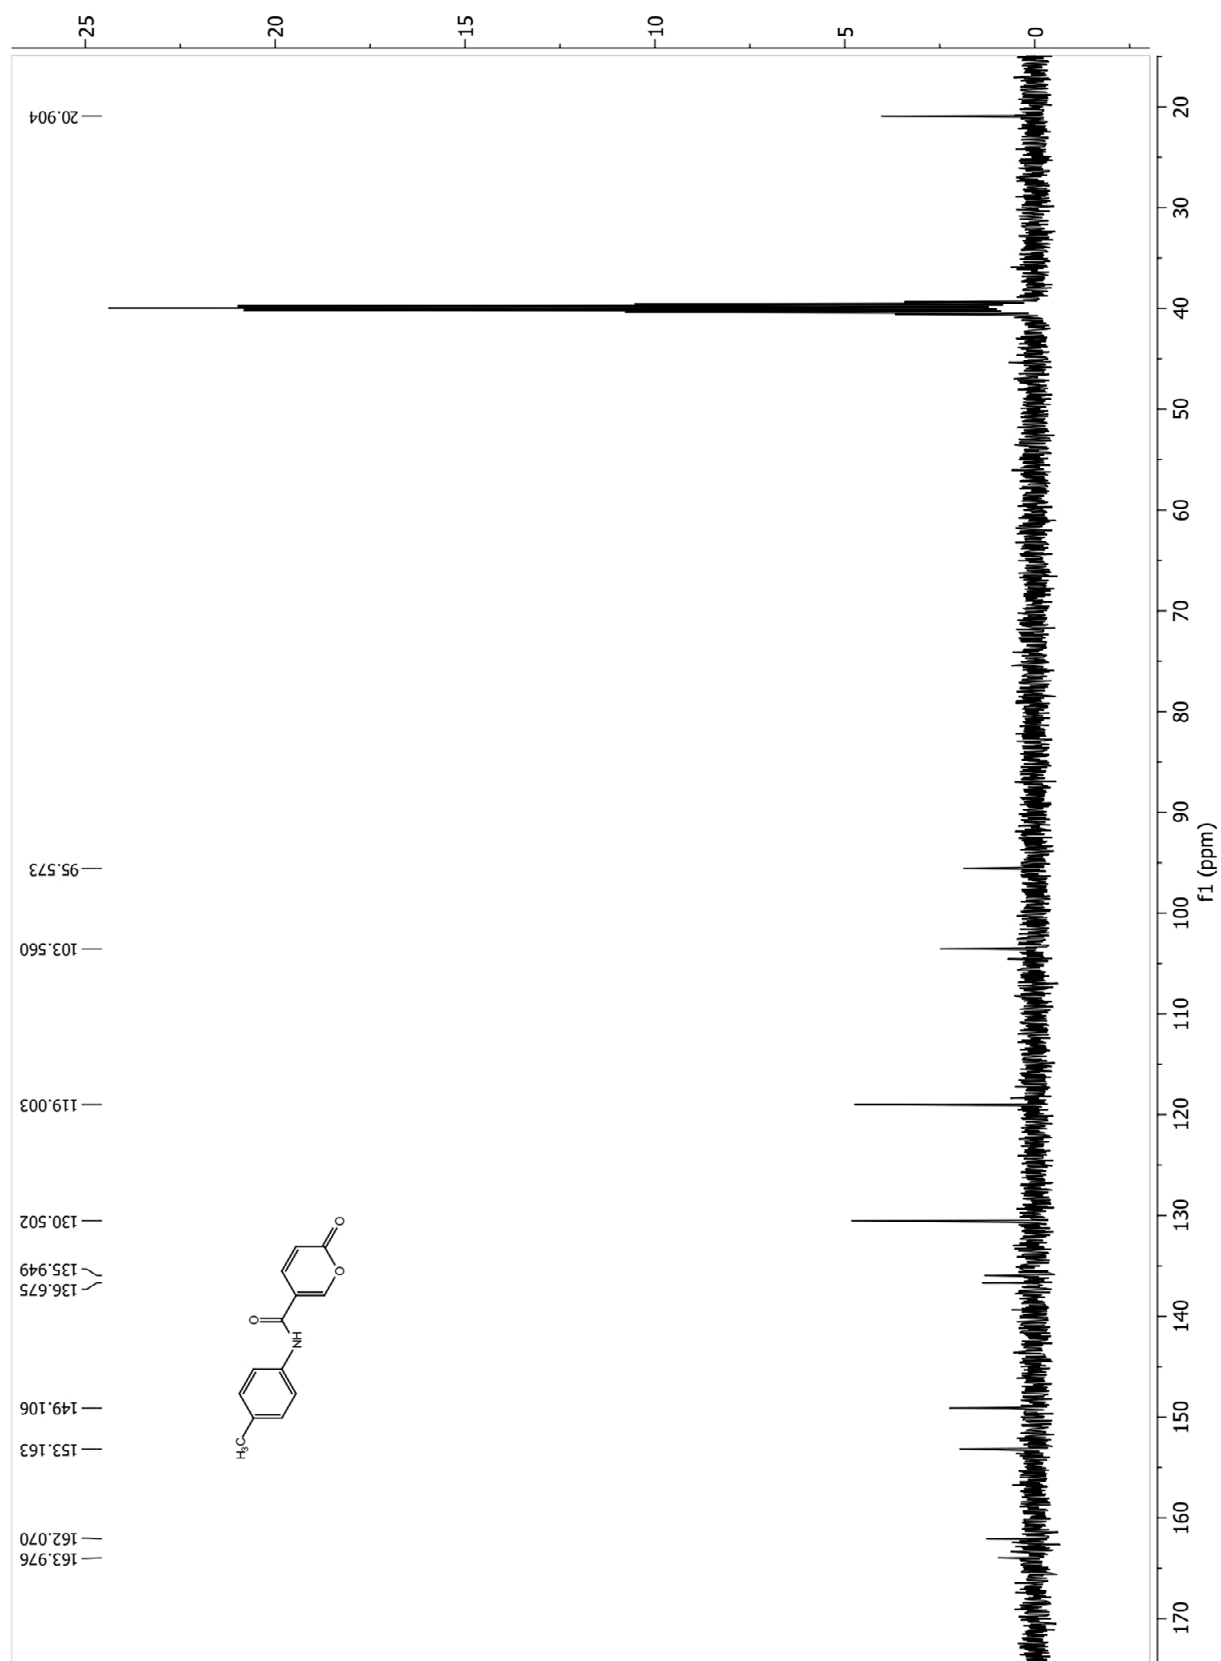

$^1\text{H}$  NMR spectrum of compound **4**

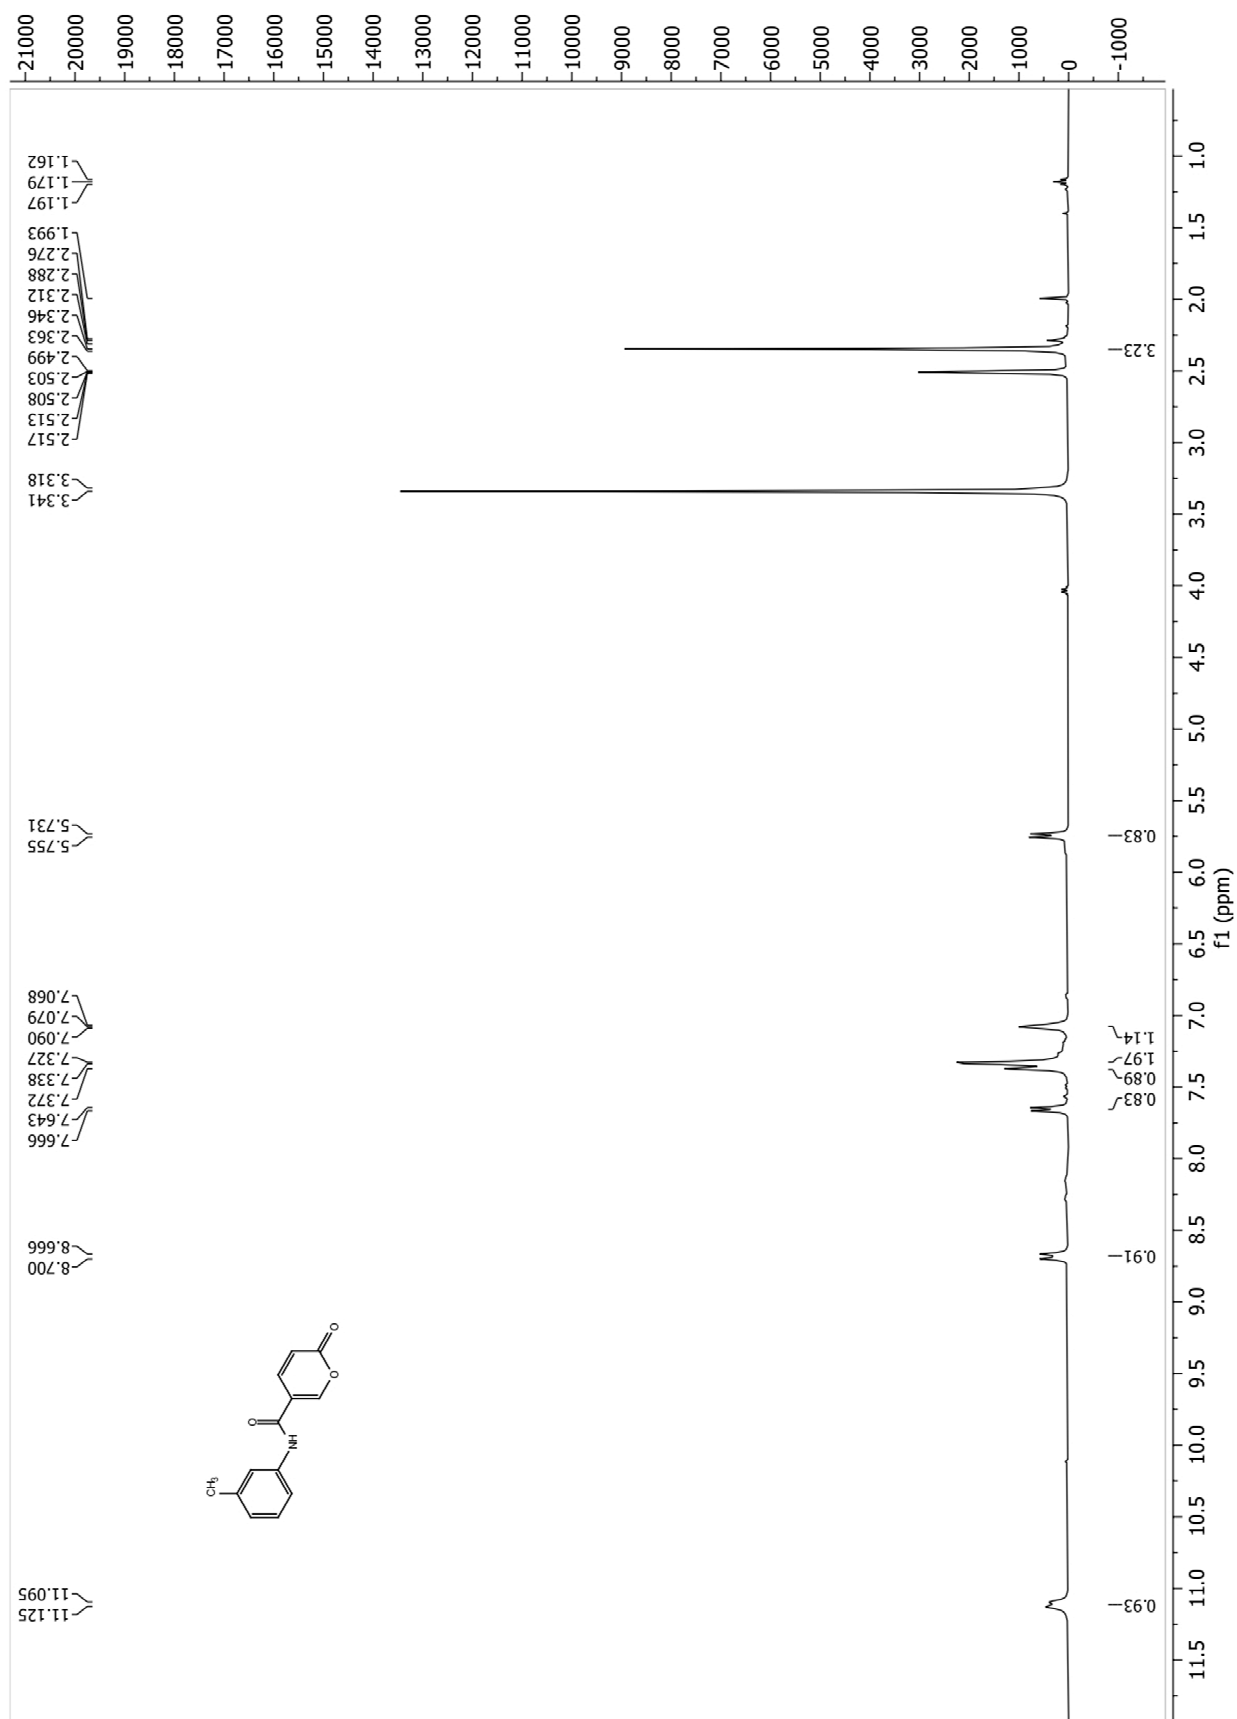

$^{13}\text{C}$  NMR spectrum of compound **4**

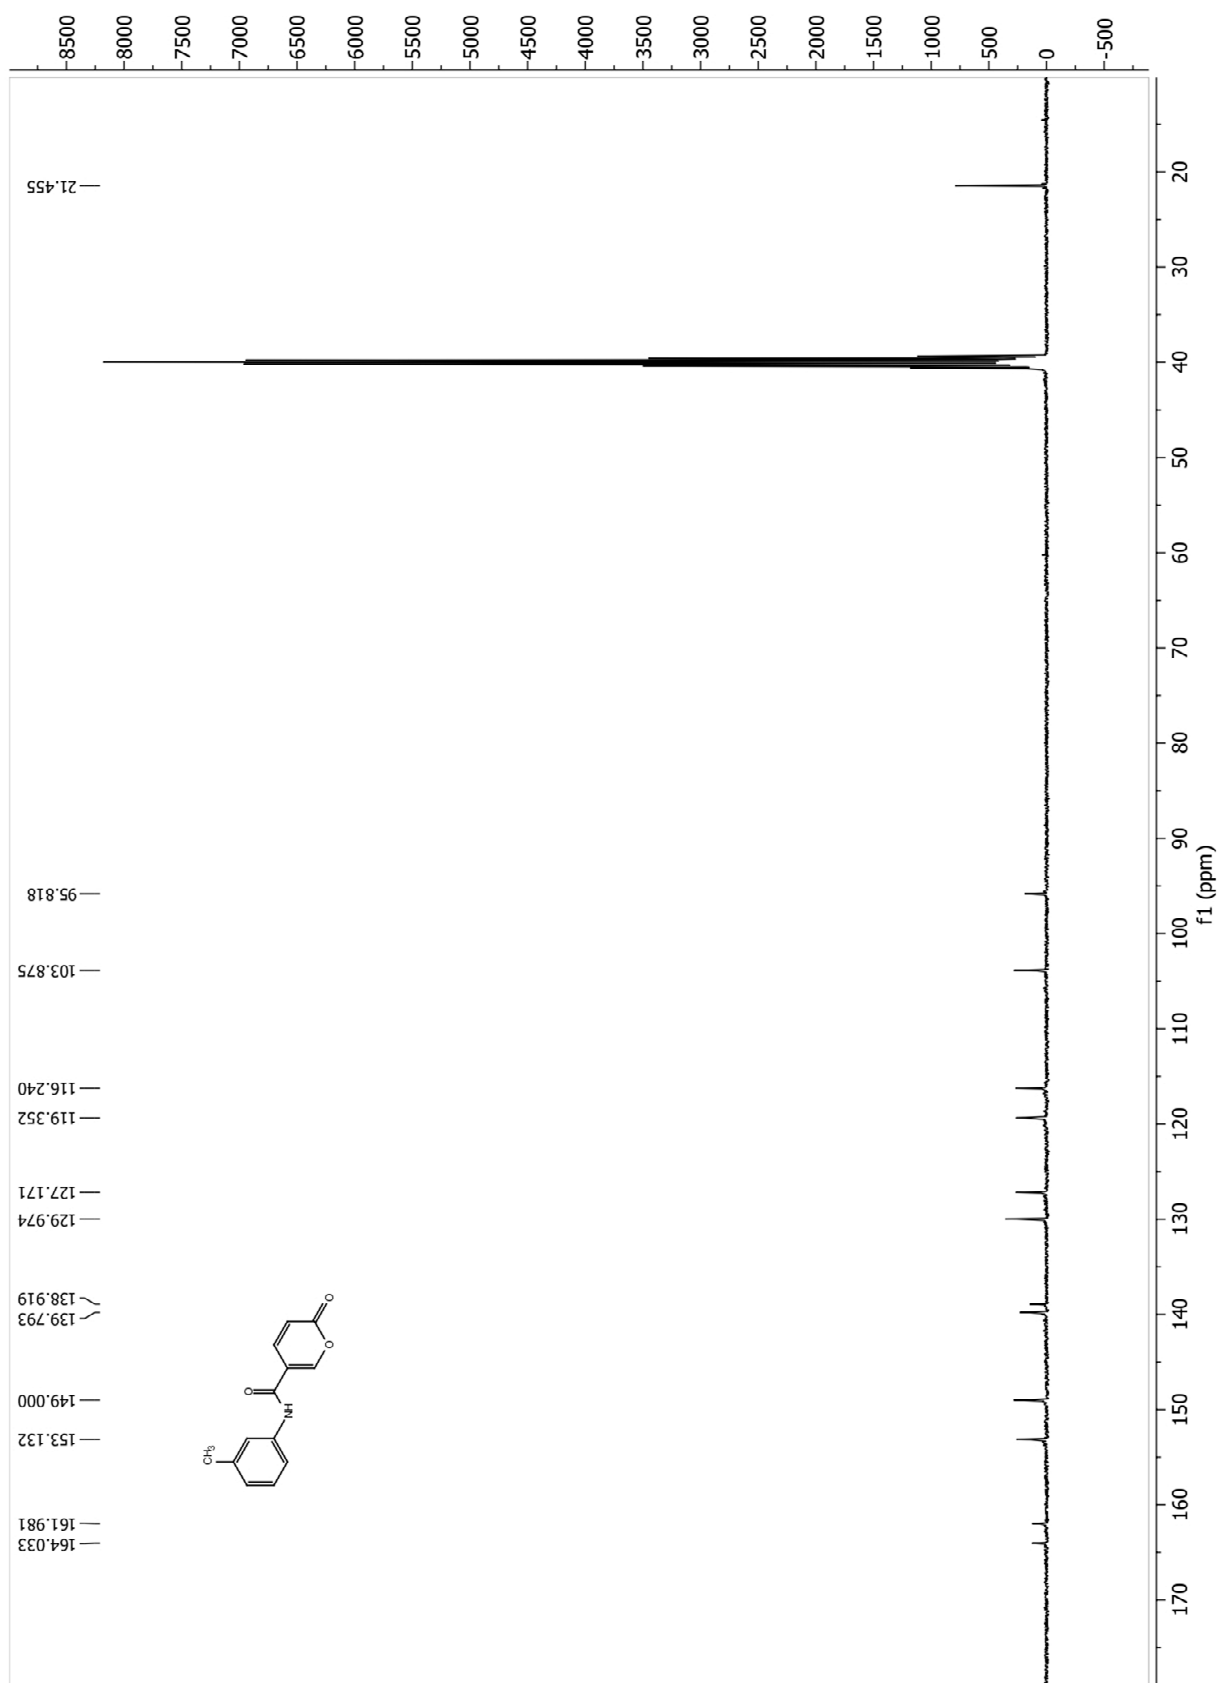

<sup>1</sup>H NMR spectrum of compound 5

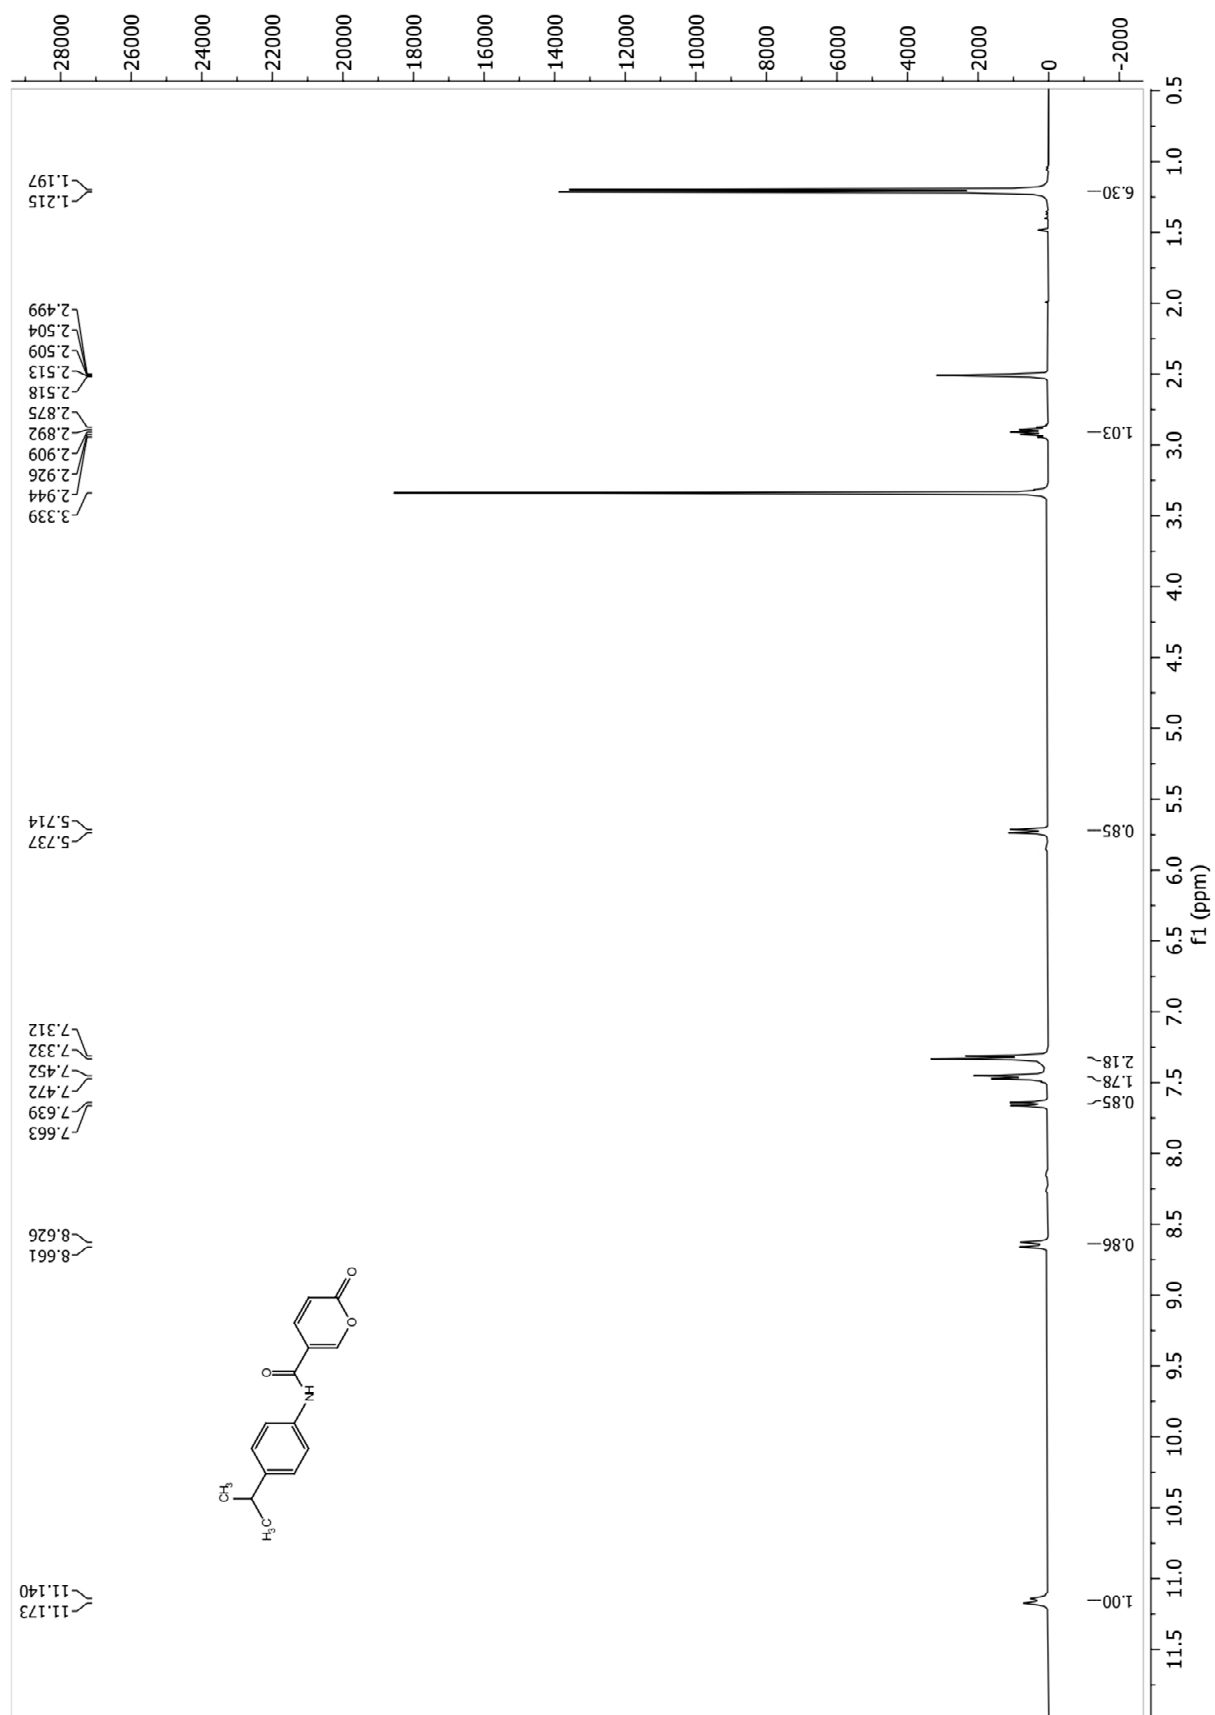



$^1\text{H}$ - $^1\text{H}$  NMR-COSY spectrum of compound 5

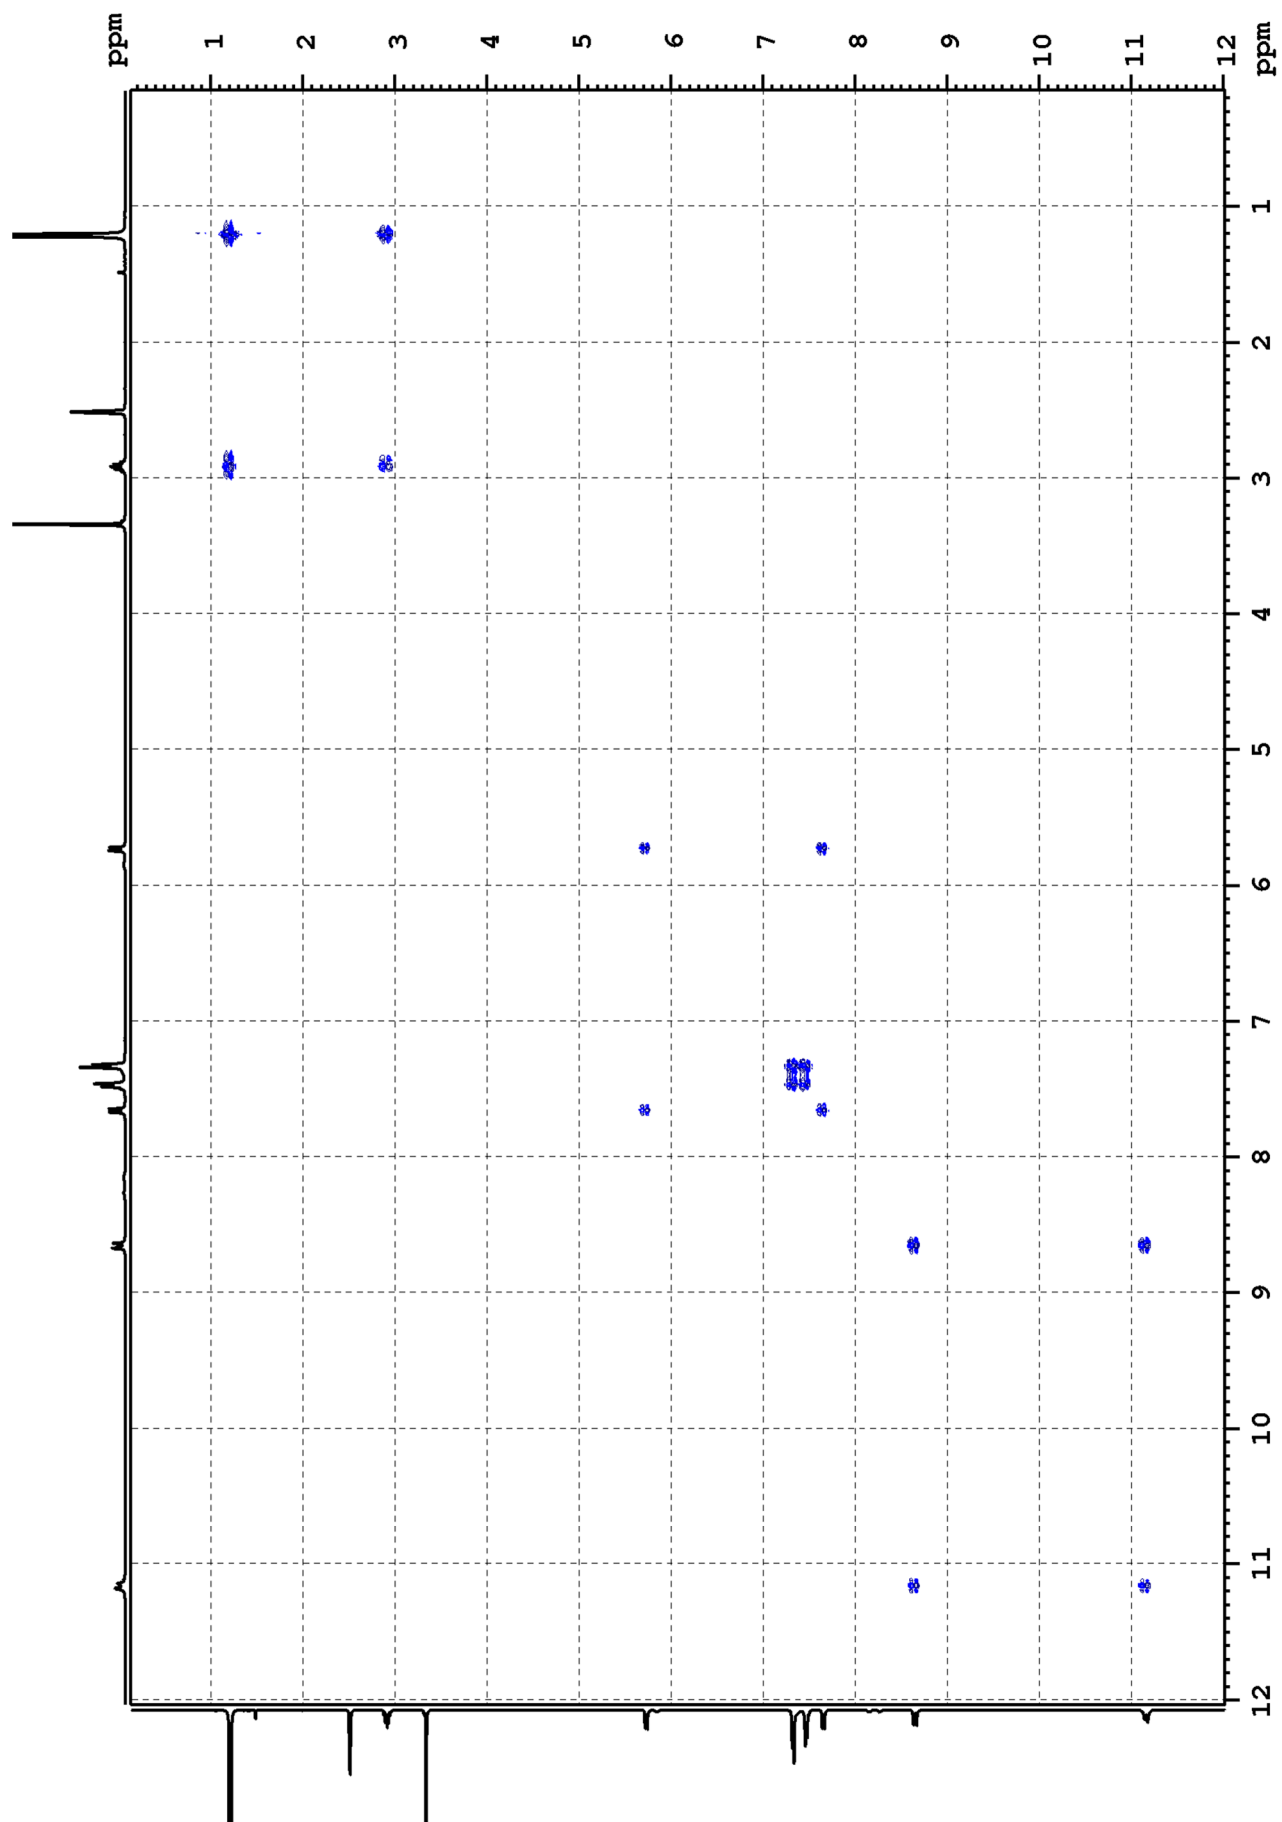

$^1\text{H}$ - $^1\text{H}$  NMR-NOESY spectrum of compound 5

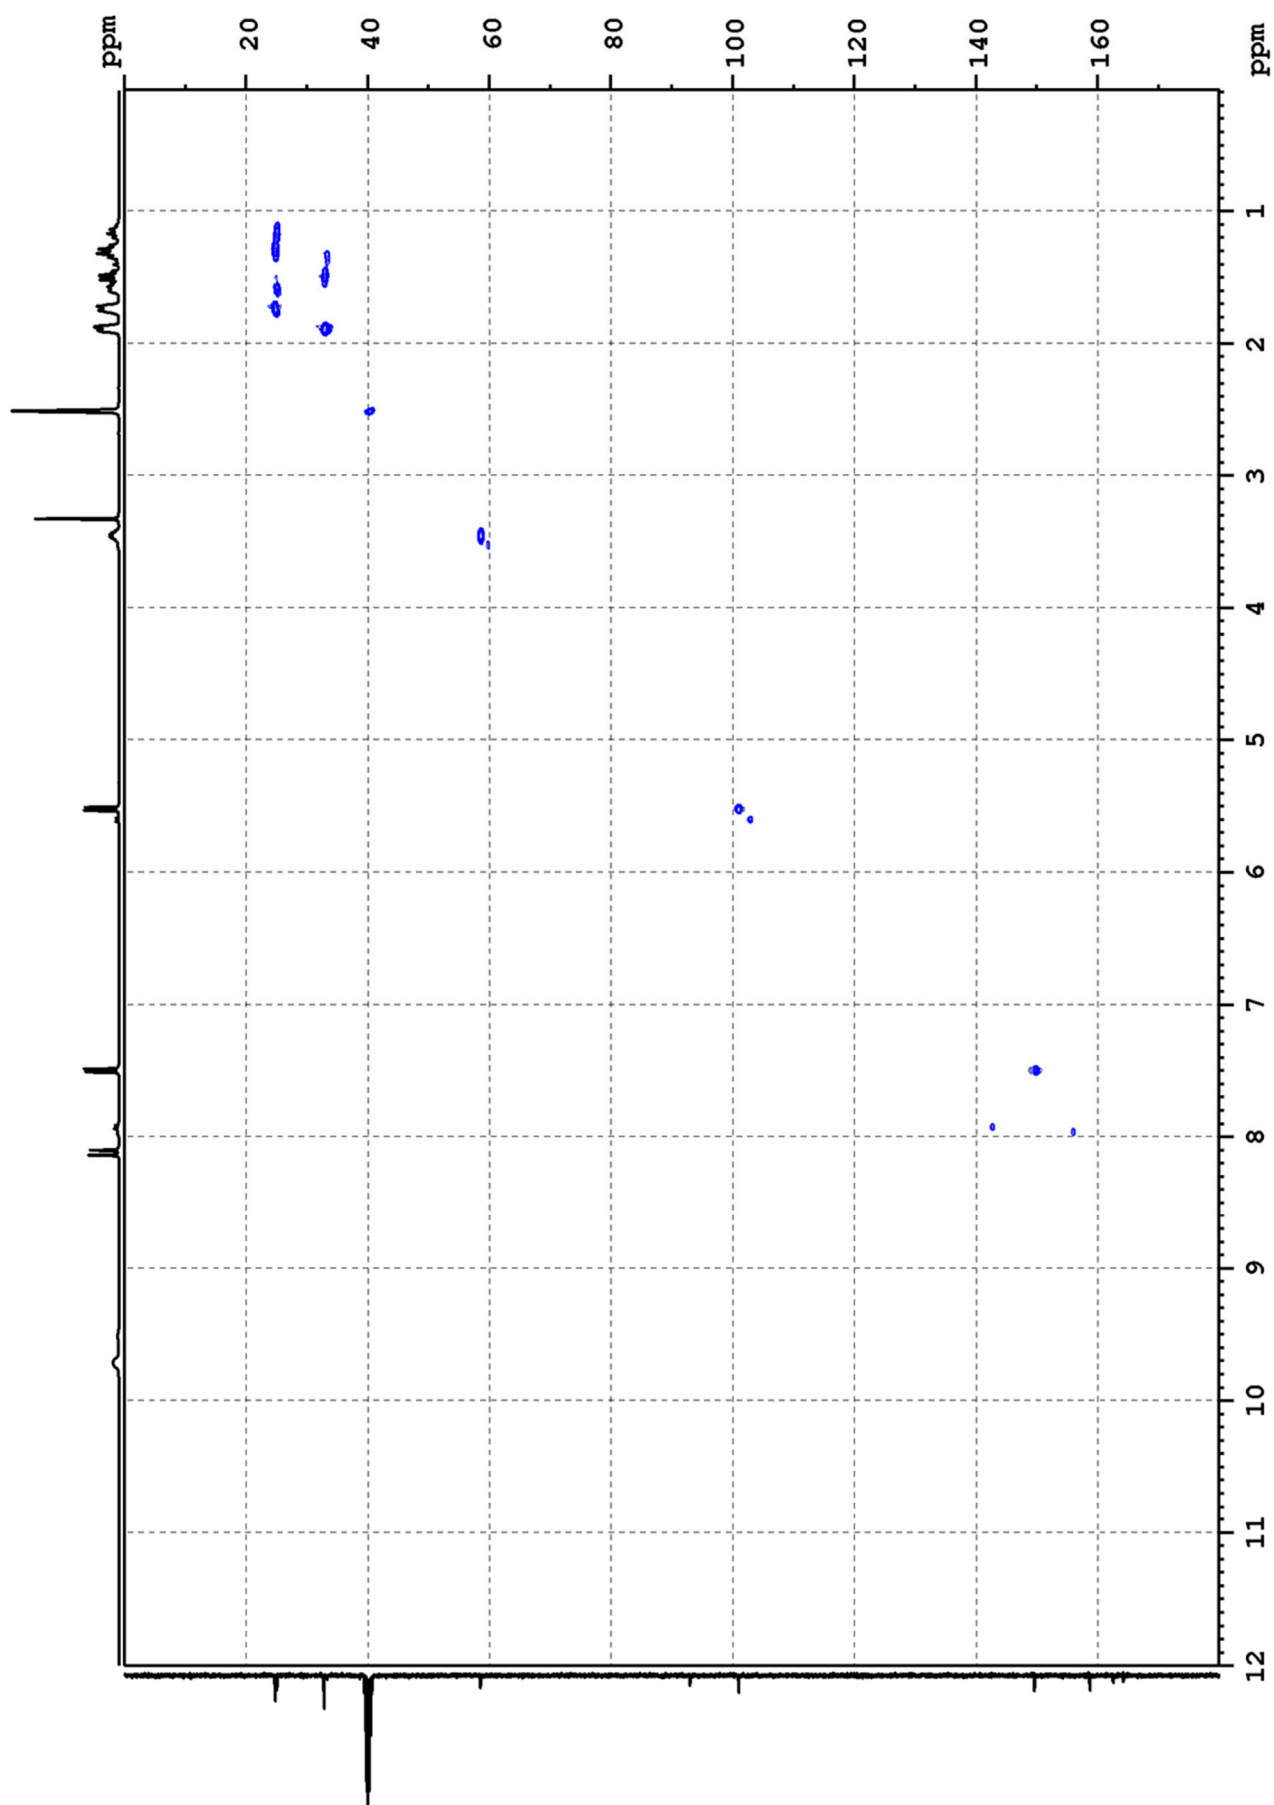

$^{13}\text{C}$  NMR spectrum of compound 5

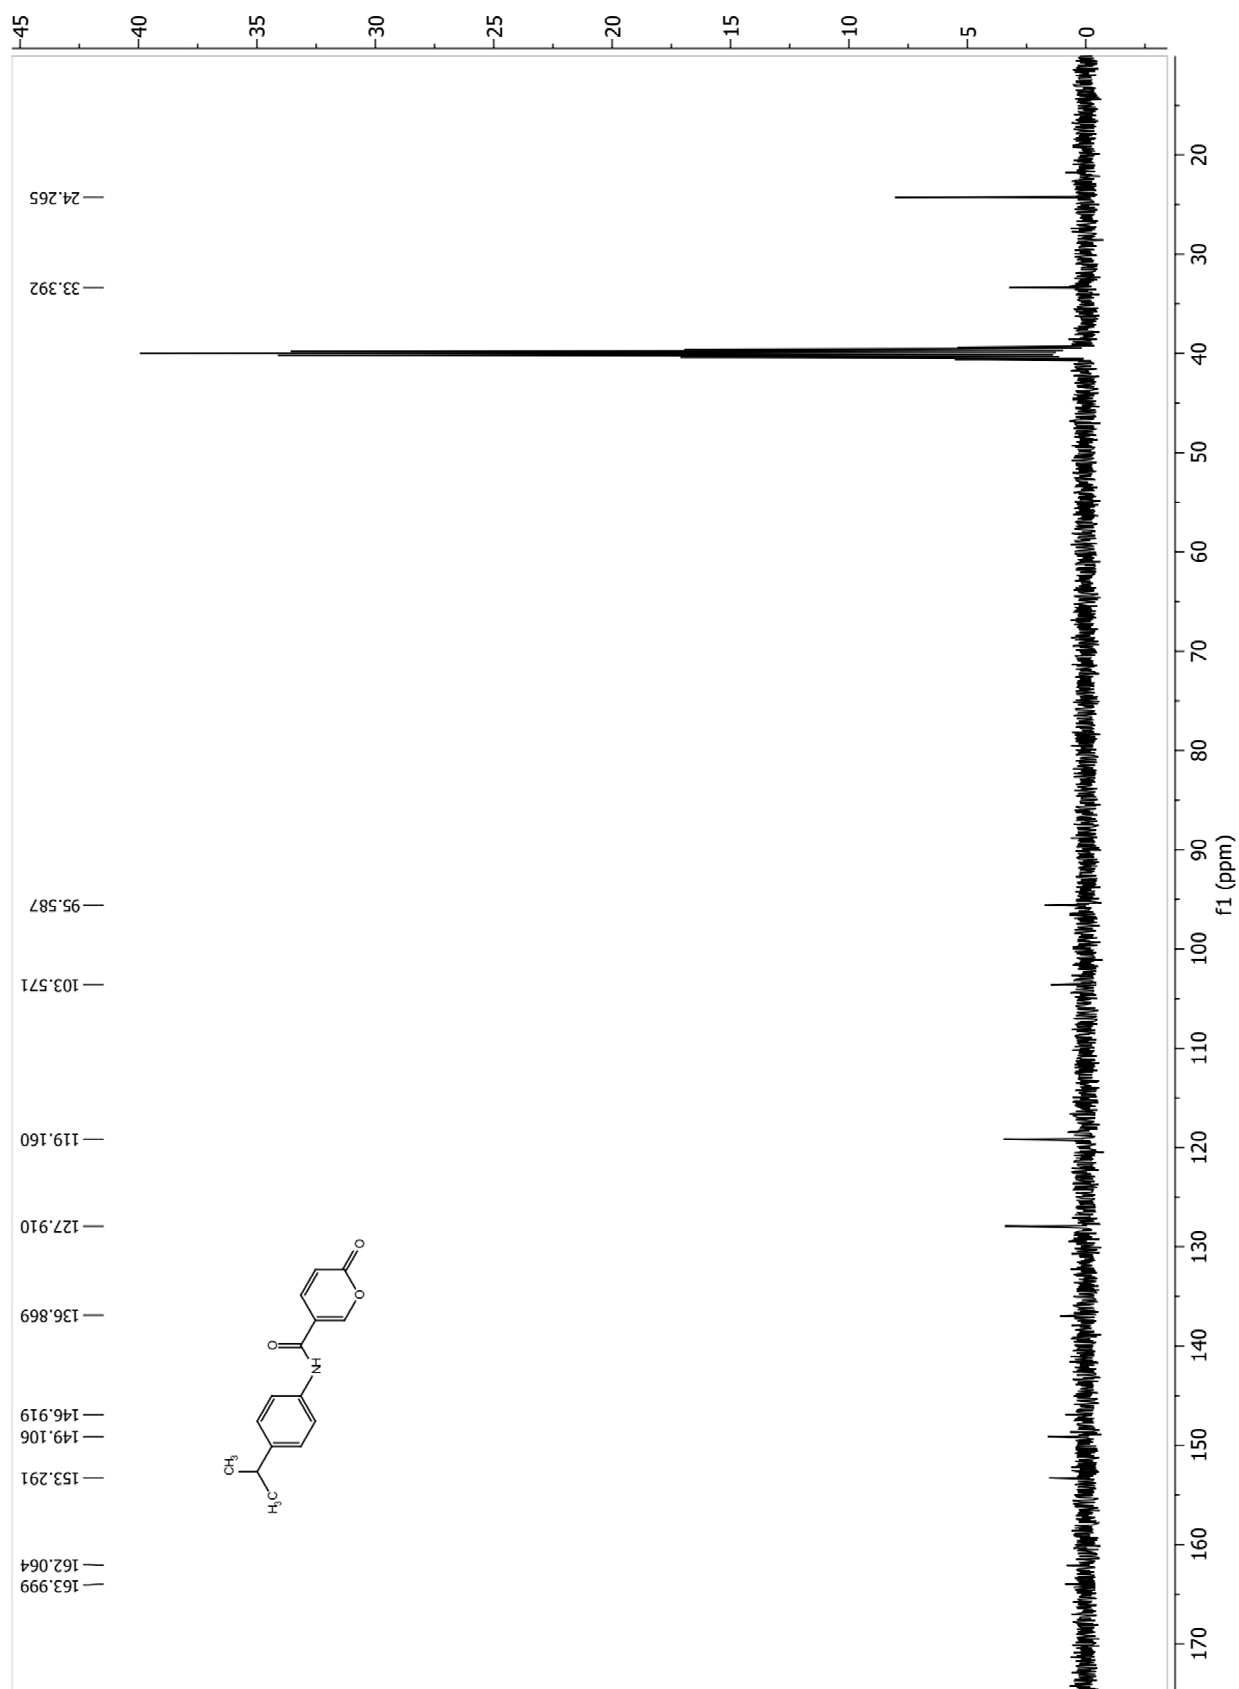

$^1\text{H}$ - $^{13}\text{C}$  HSQC spectrum of compound 5

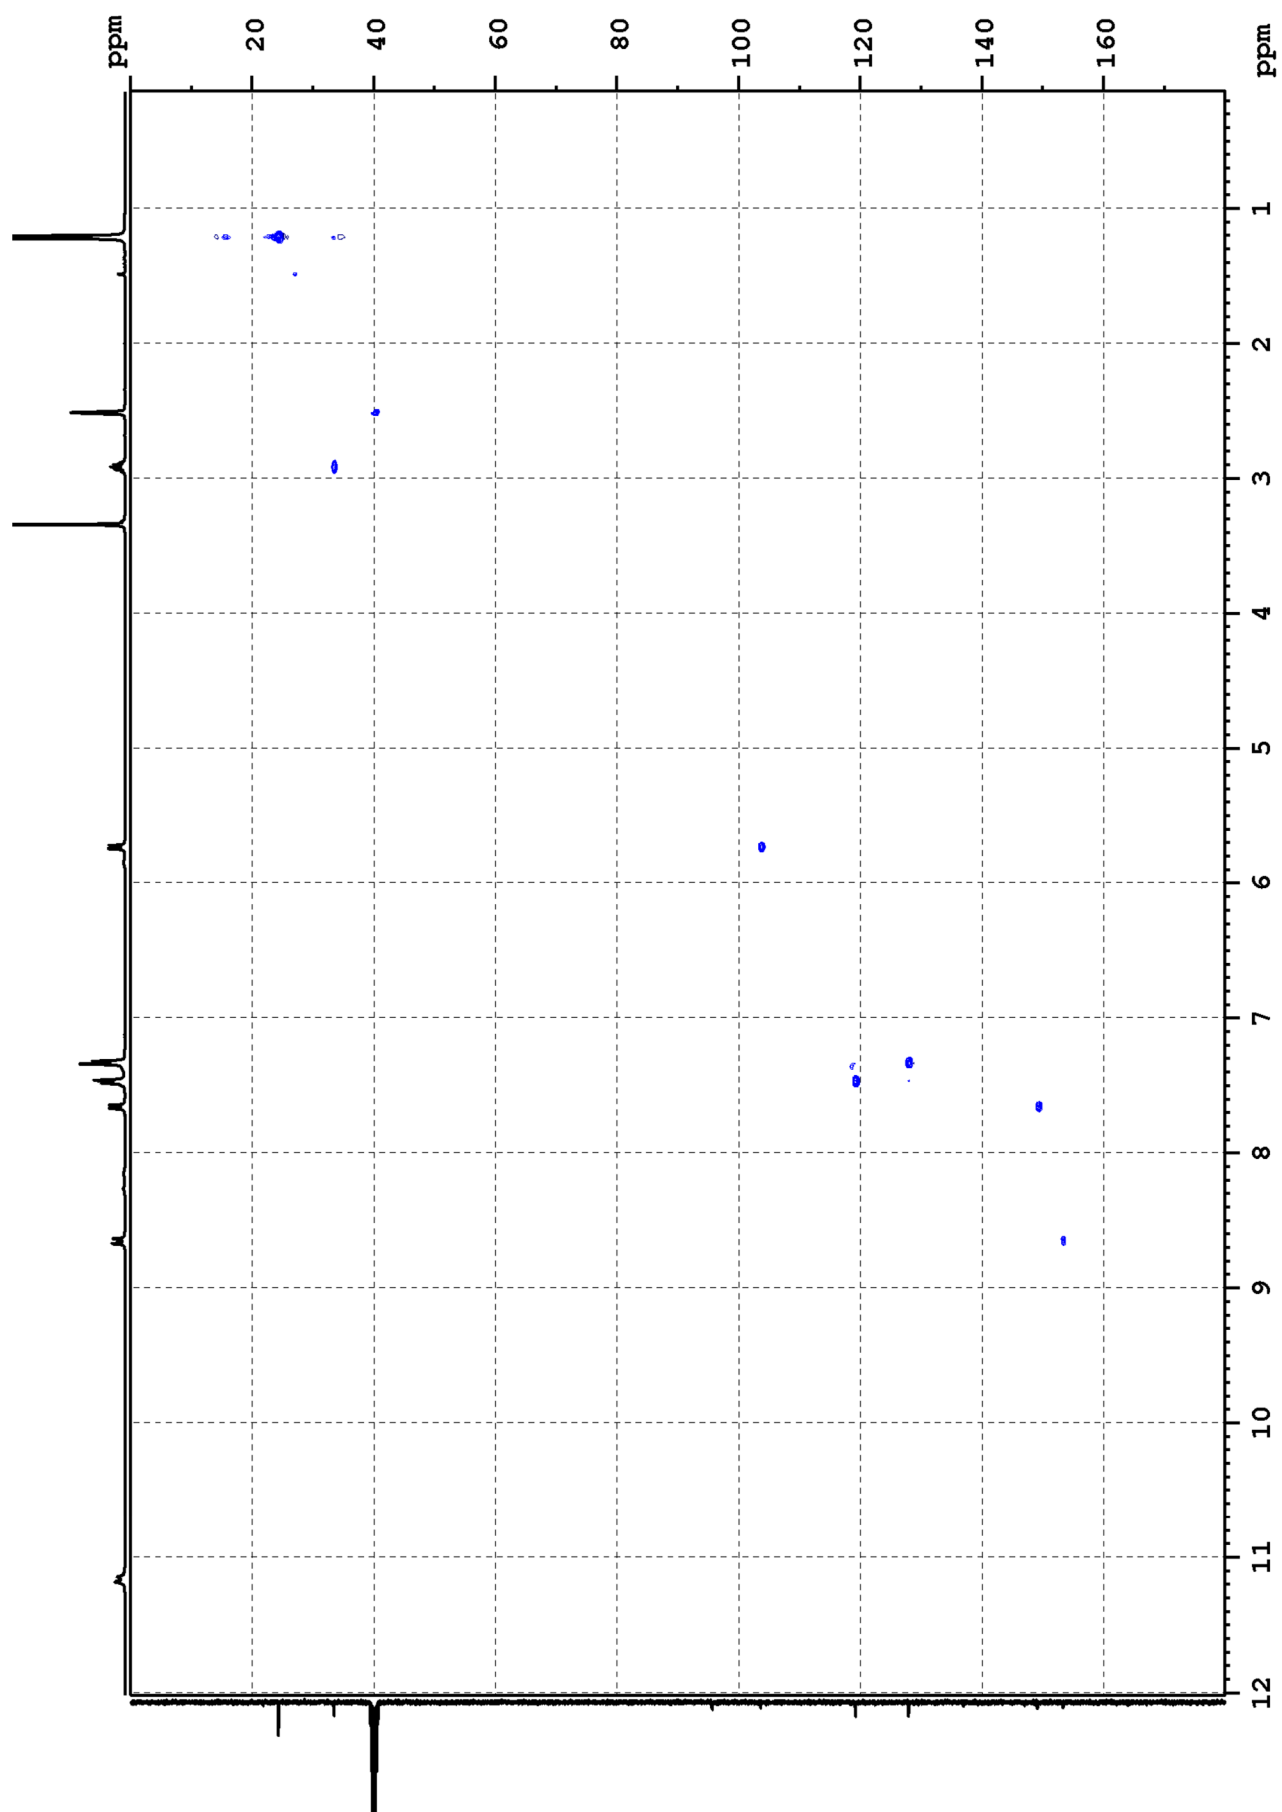

$^1\text{H}$  NMR spectrum of compound **6**

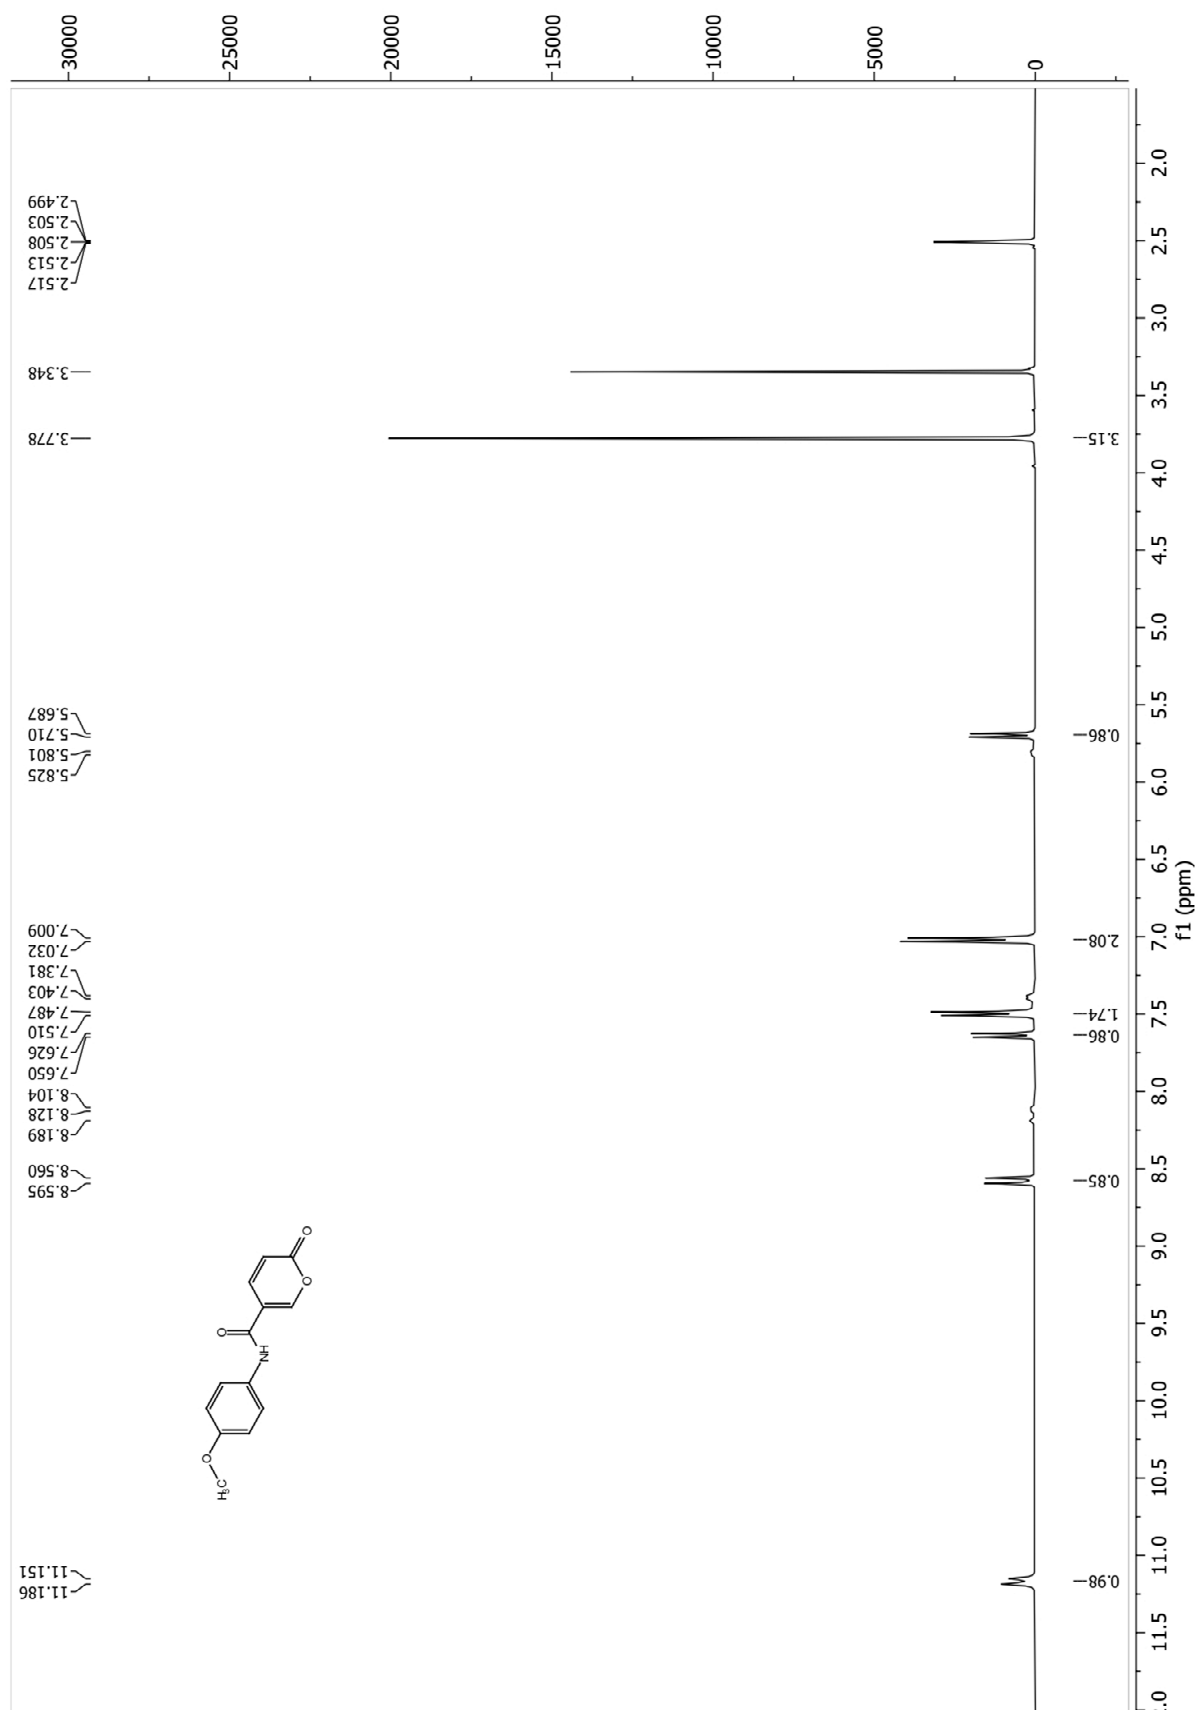

<sup>13</sup>C NMR spectrum of compound 6

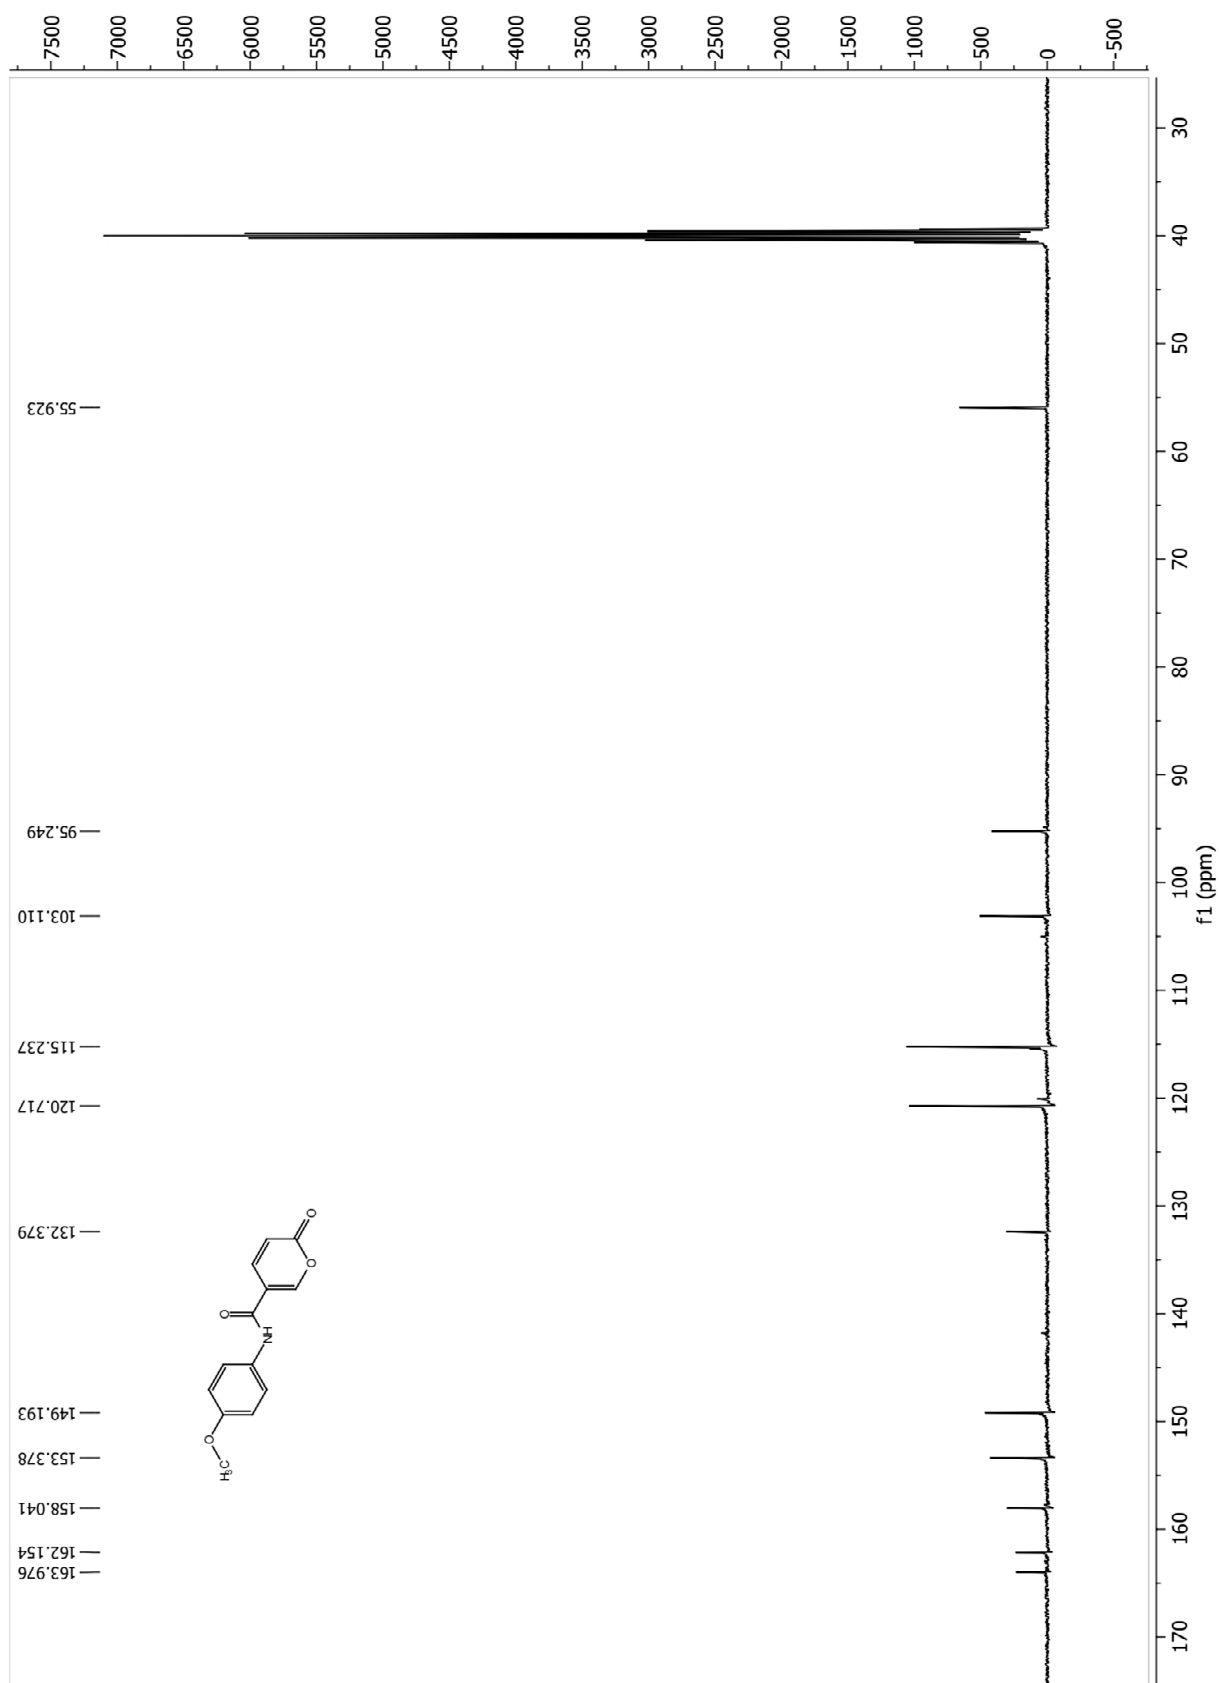

$^1\text{H}$  NMR spectrum of compound 7

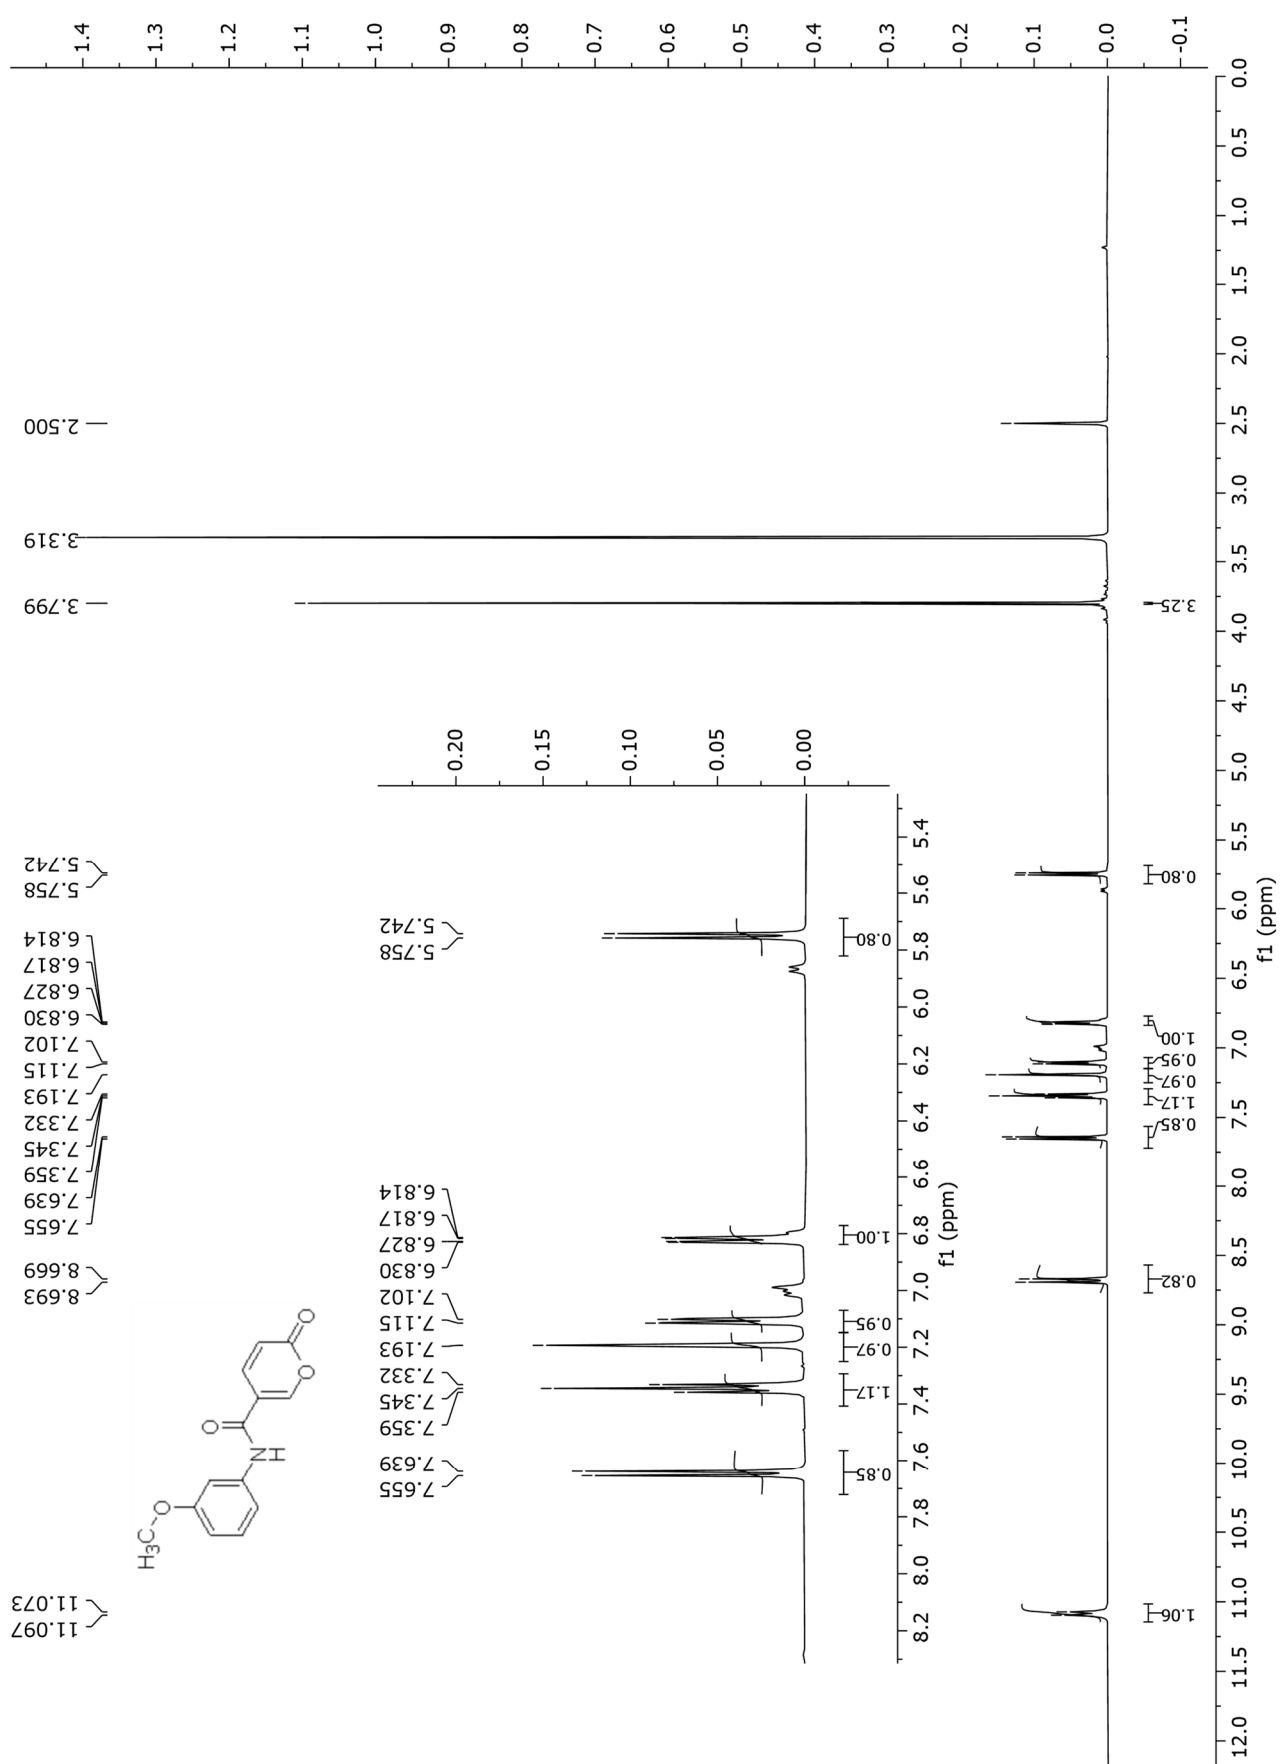

$^{13}\text{C}$  NMR spectrum of compound 7

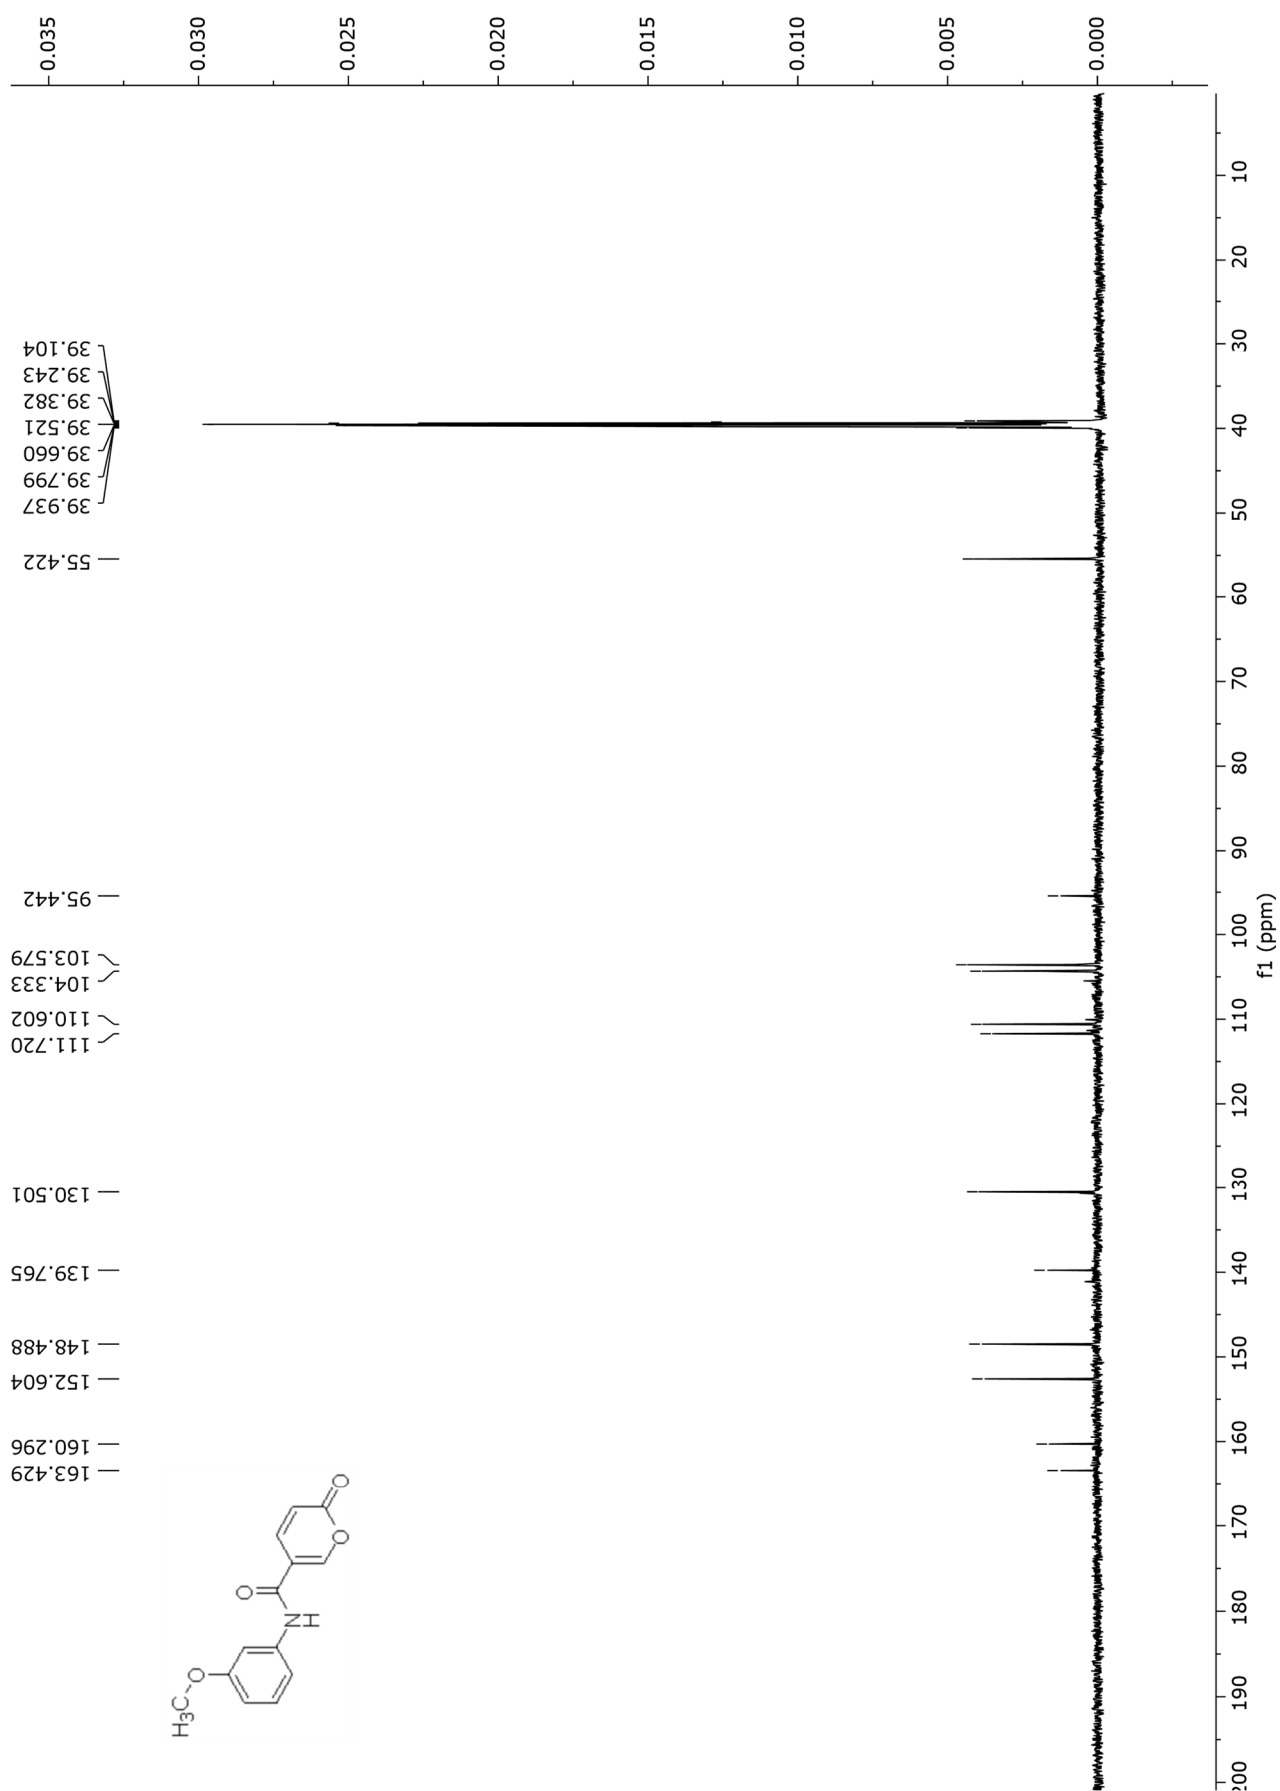



<sup>1</sup>H NMR spectrum of compound 8

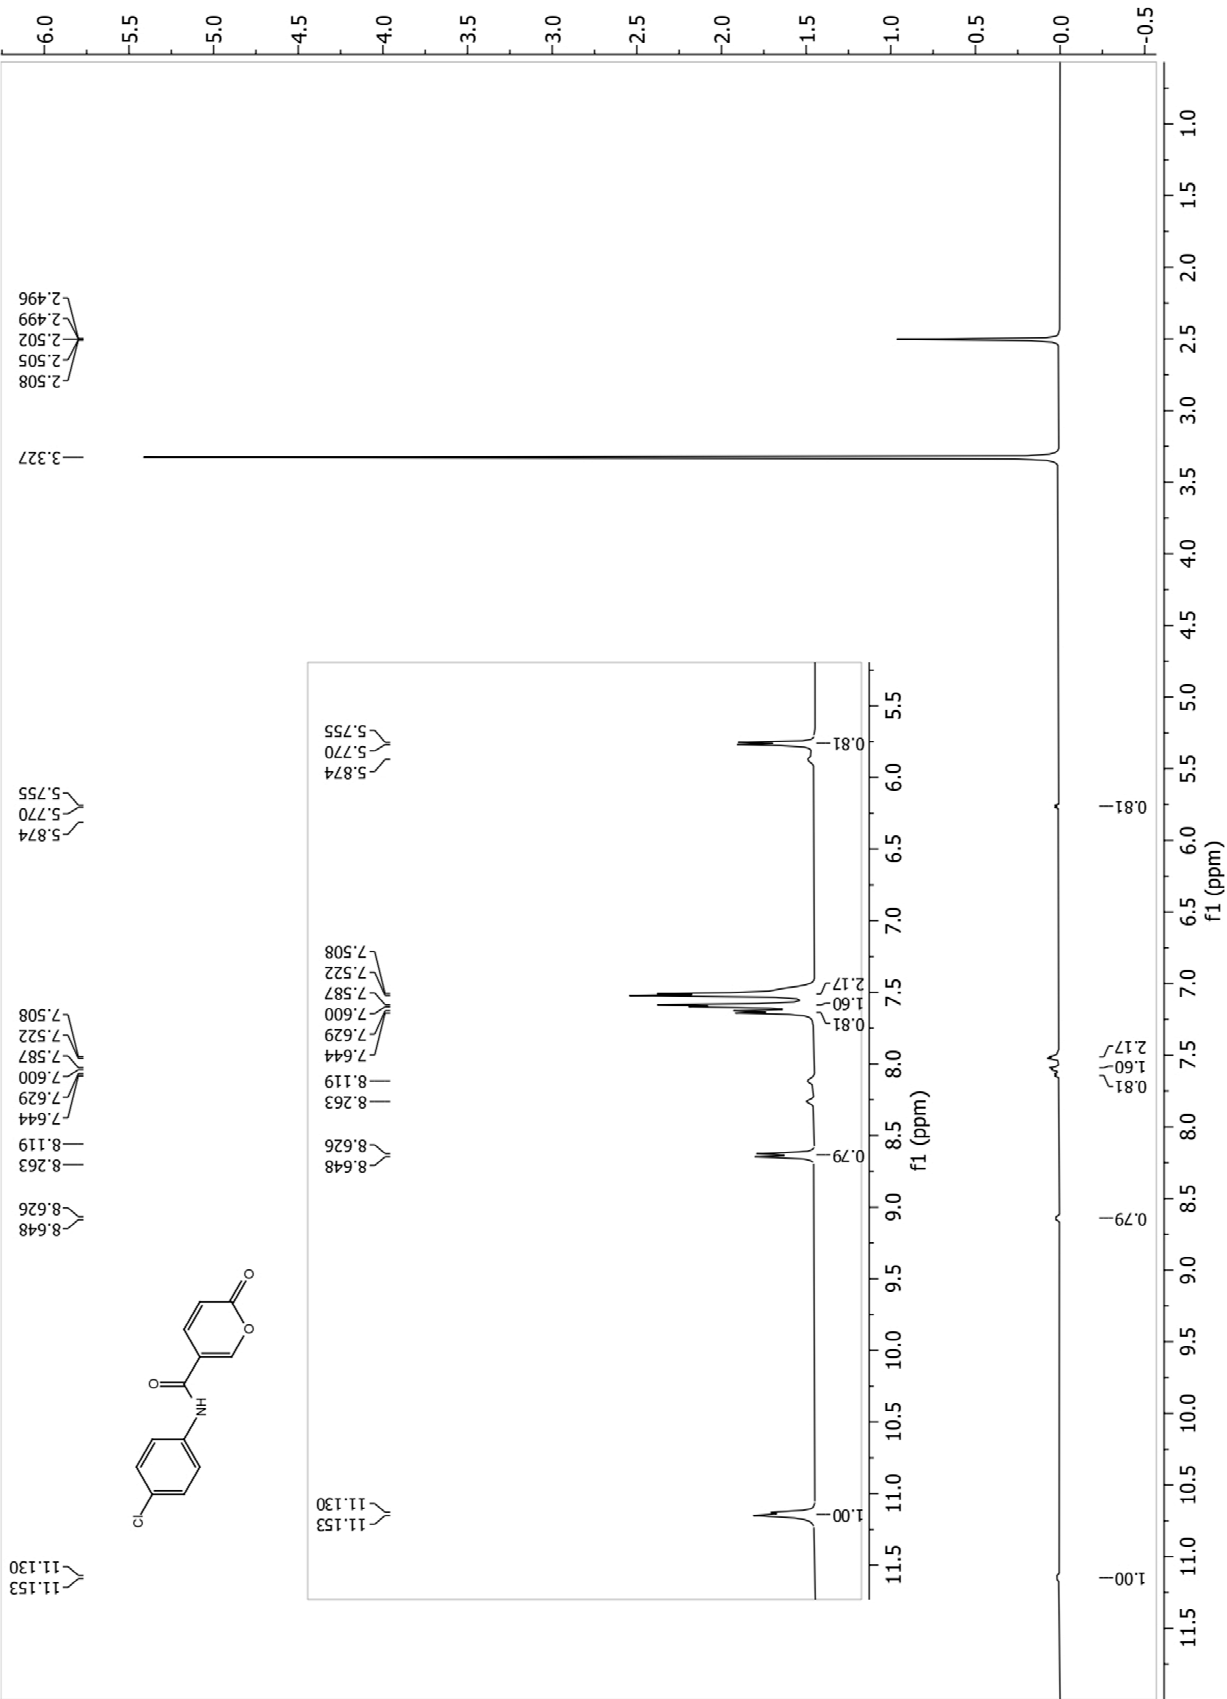

$^{13}\text{C}$  NMR spectrum of compound 8

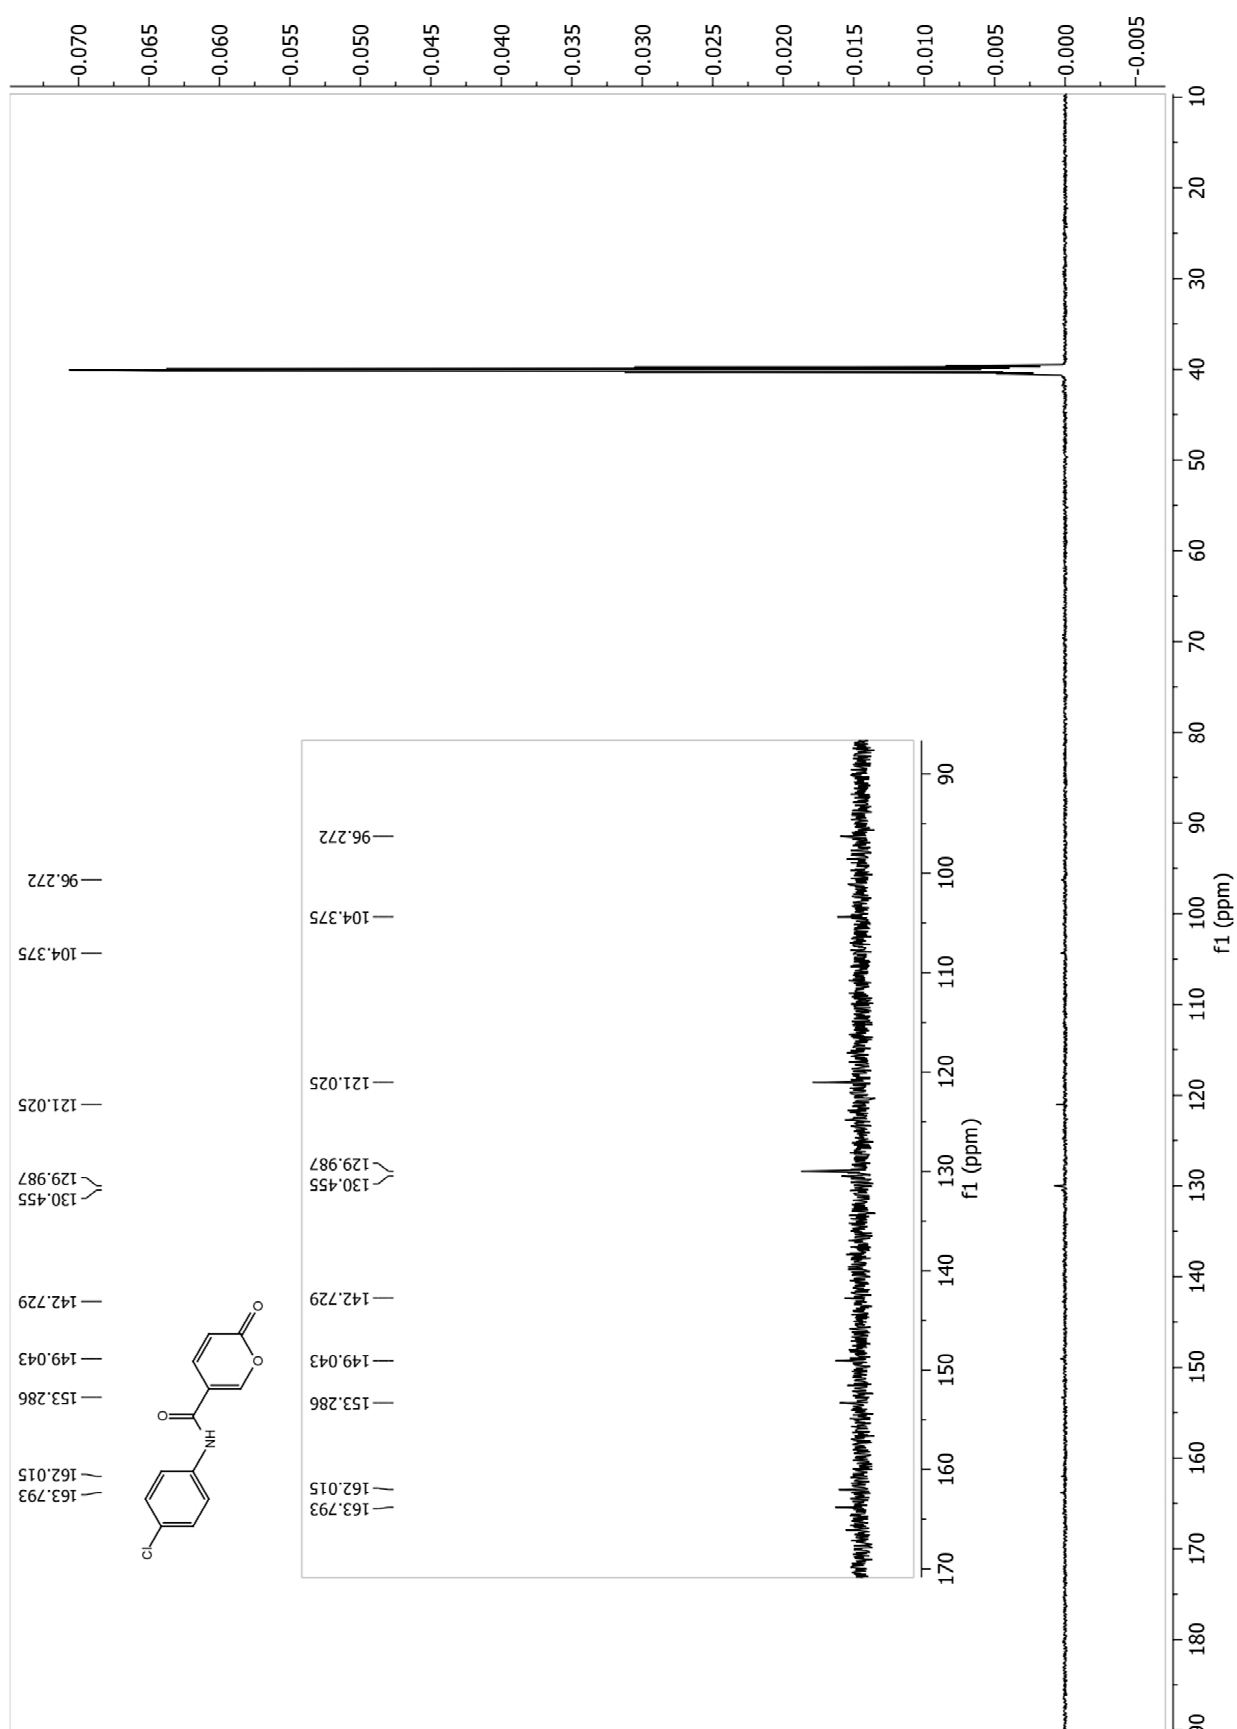

<sup>1</sup>H NMR spectrum of compound **9**

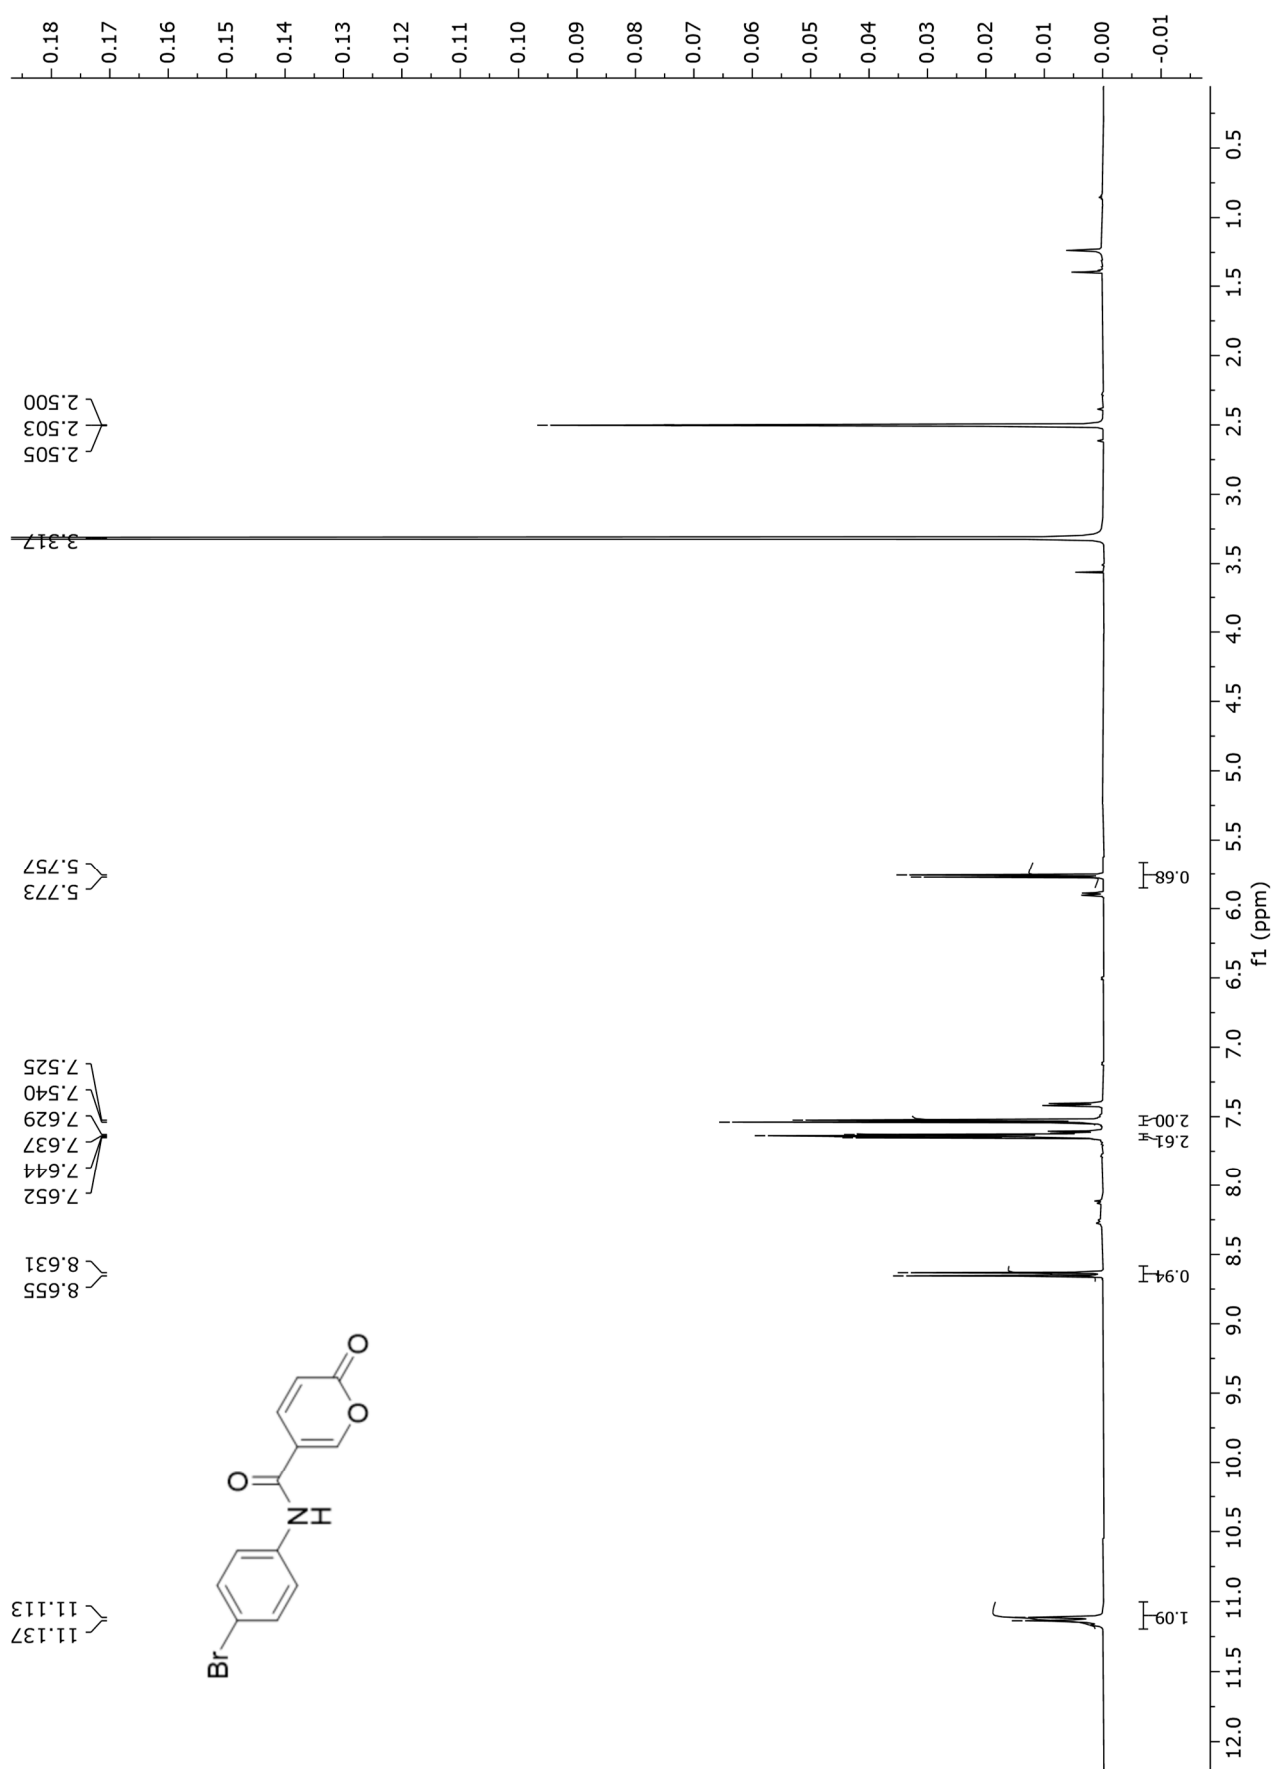

$^{13}\text{C}$  NMR spectrum of compound **9**

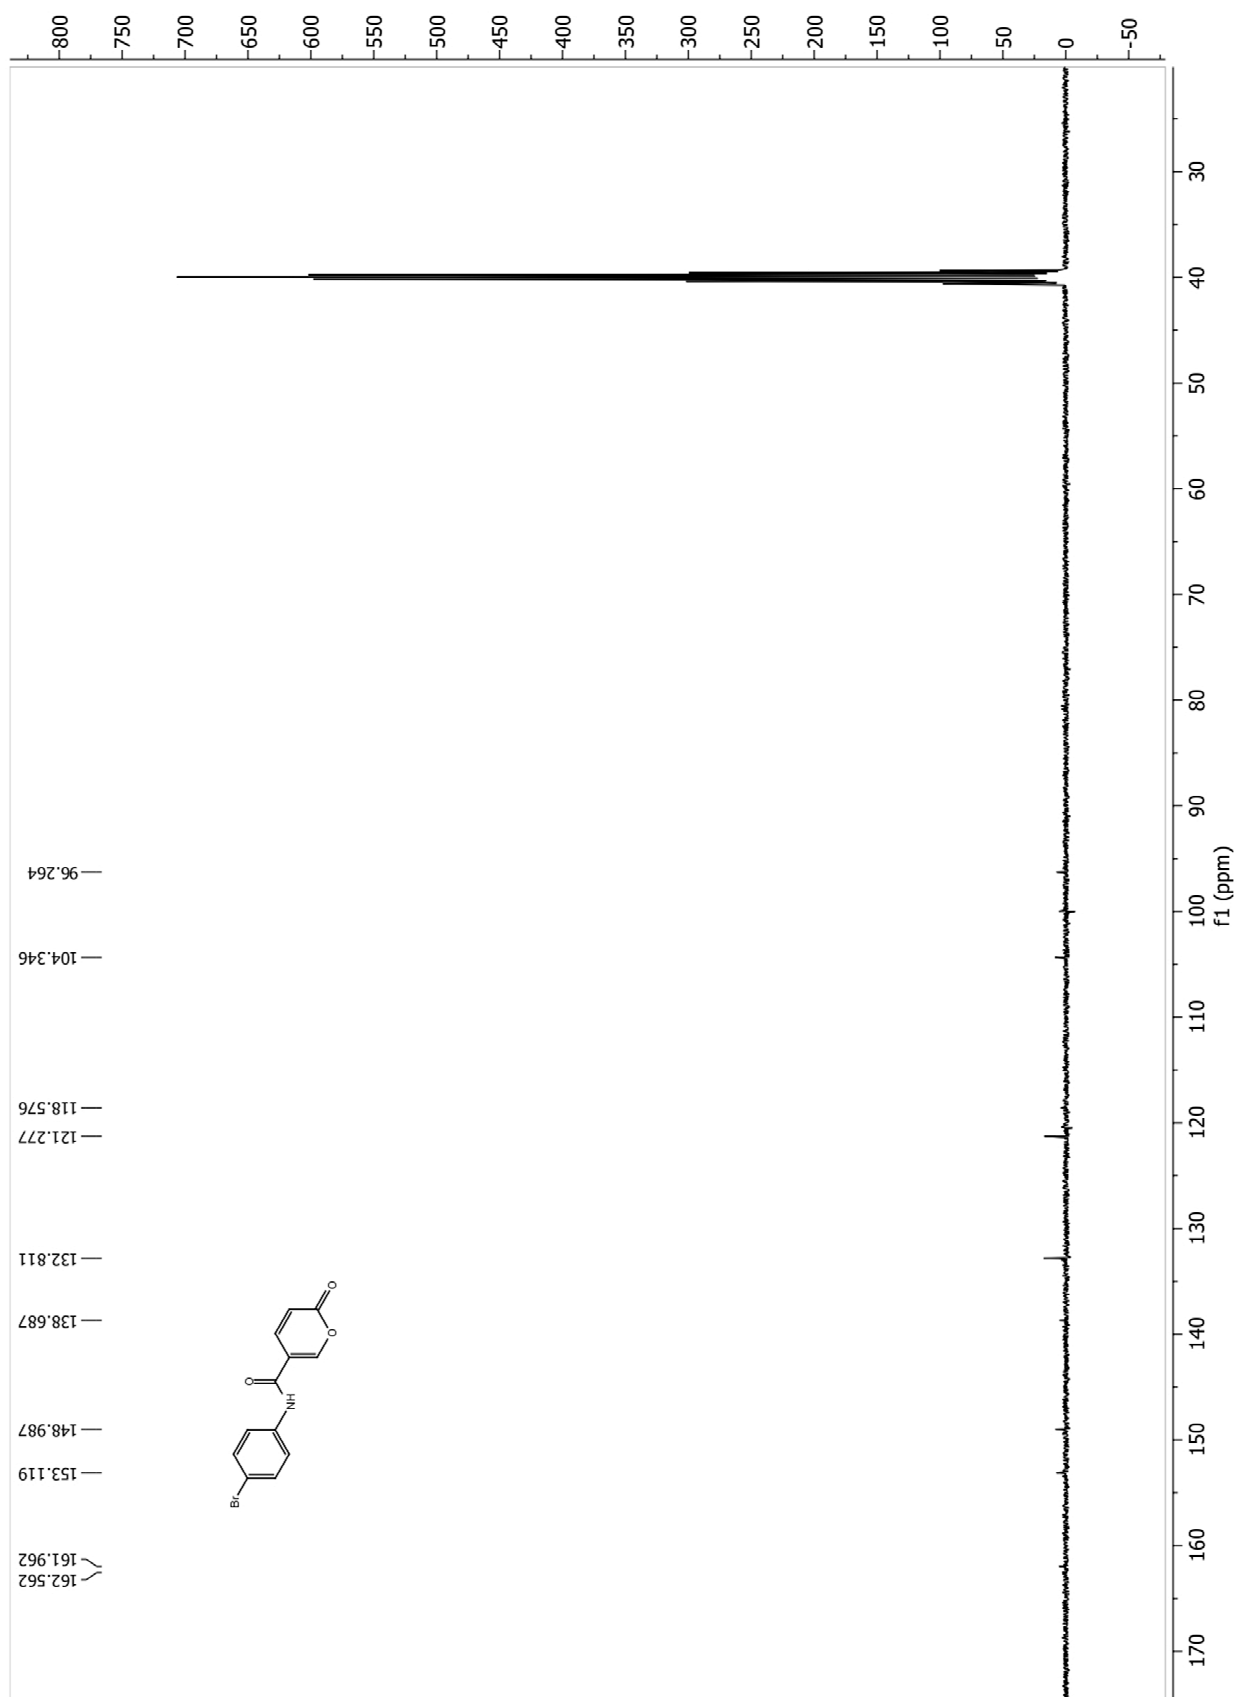

$^1\text{H}$  NMR spectrum of compound **10**

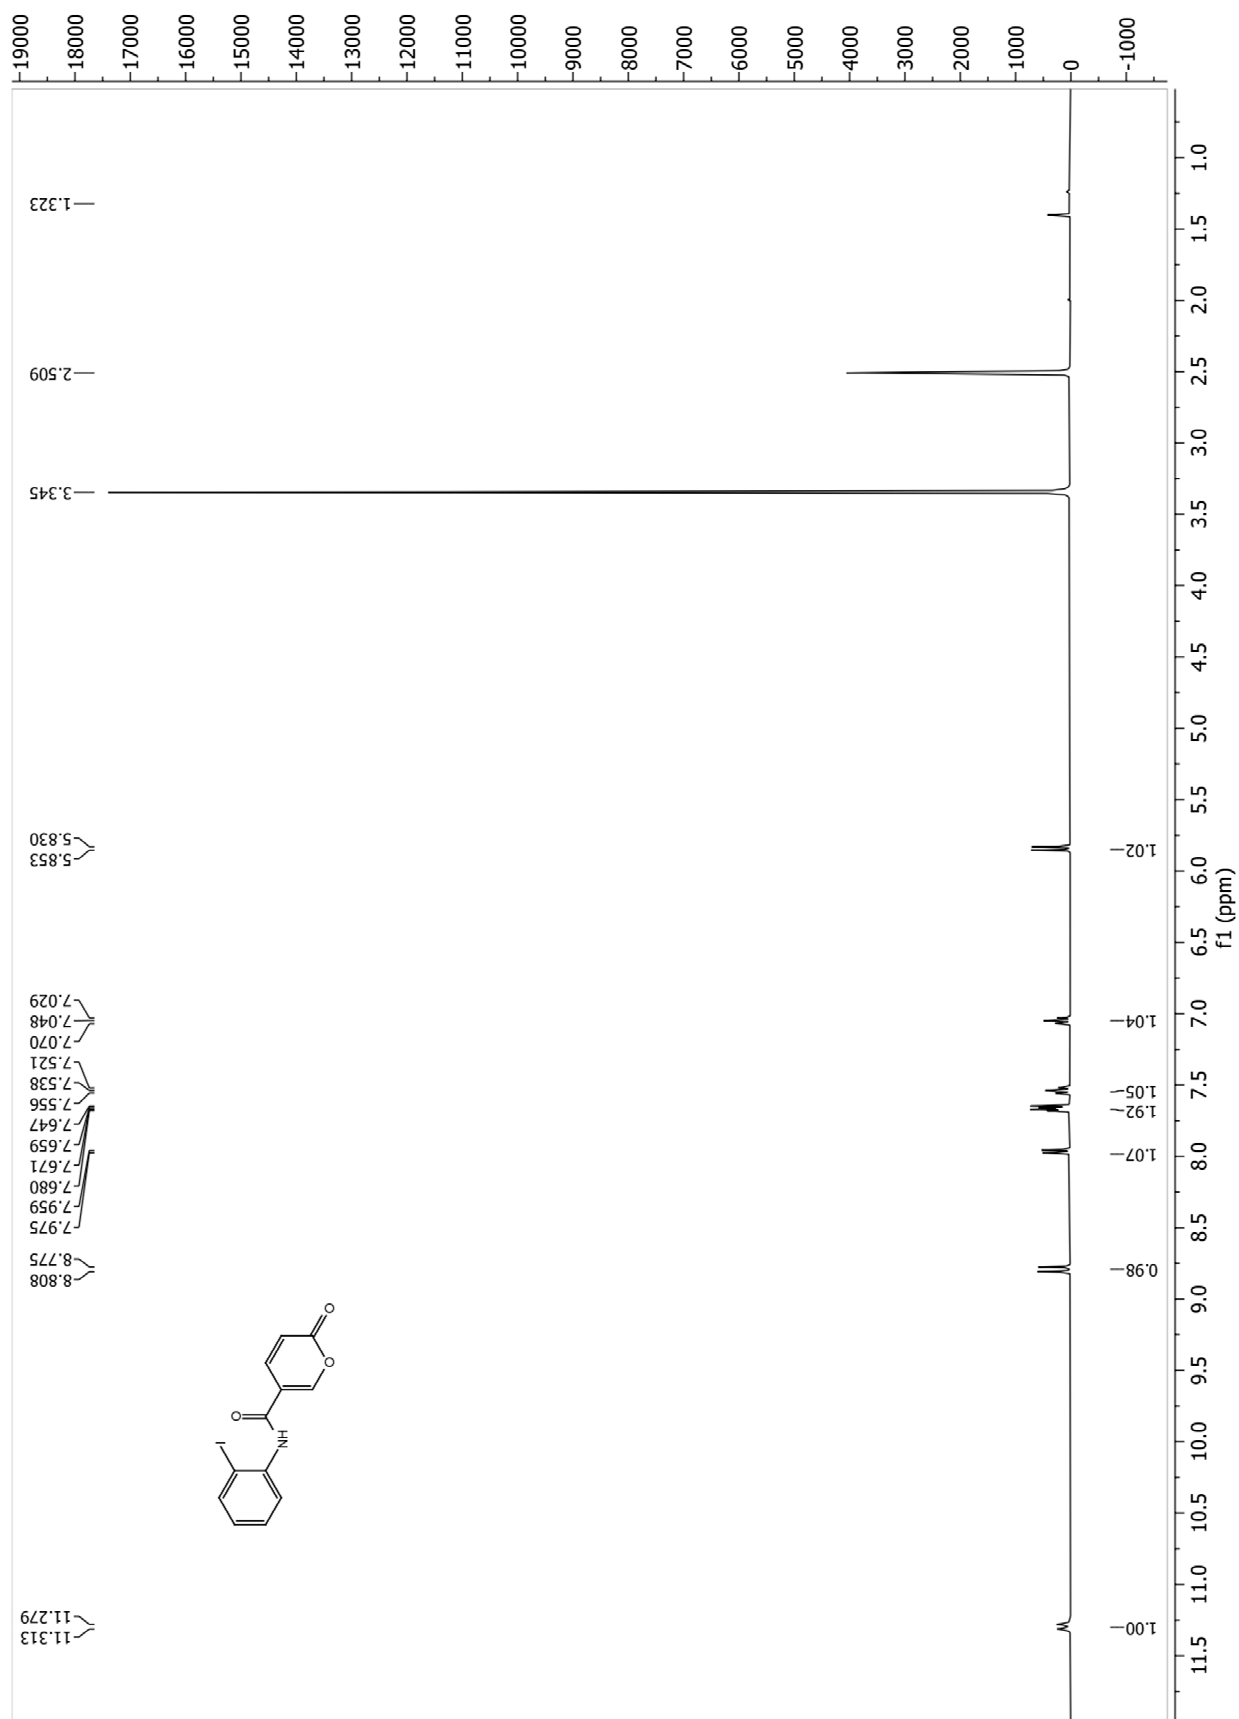

$^{13}\text{C}$  NMR spectrum of compound **10**

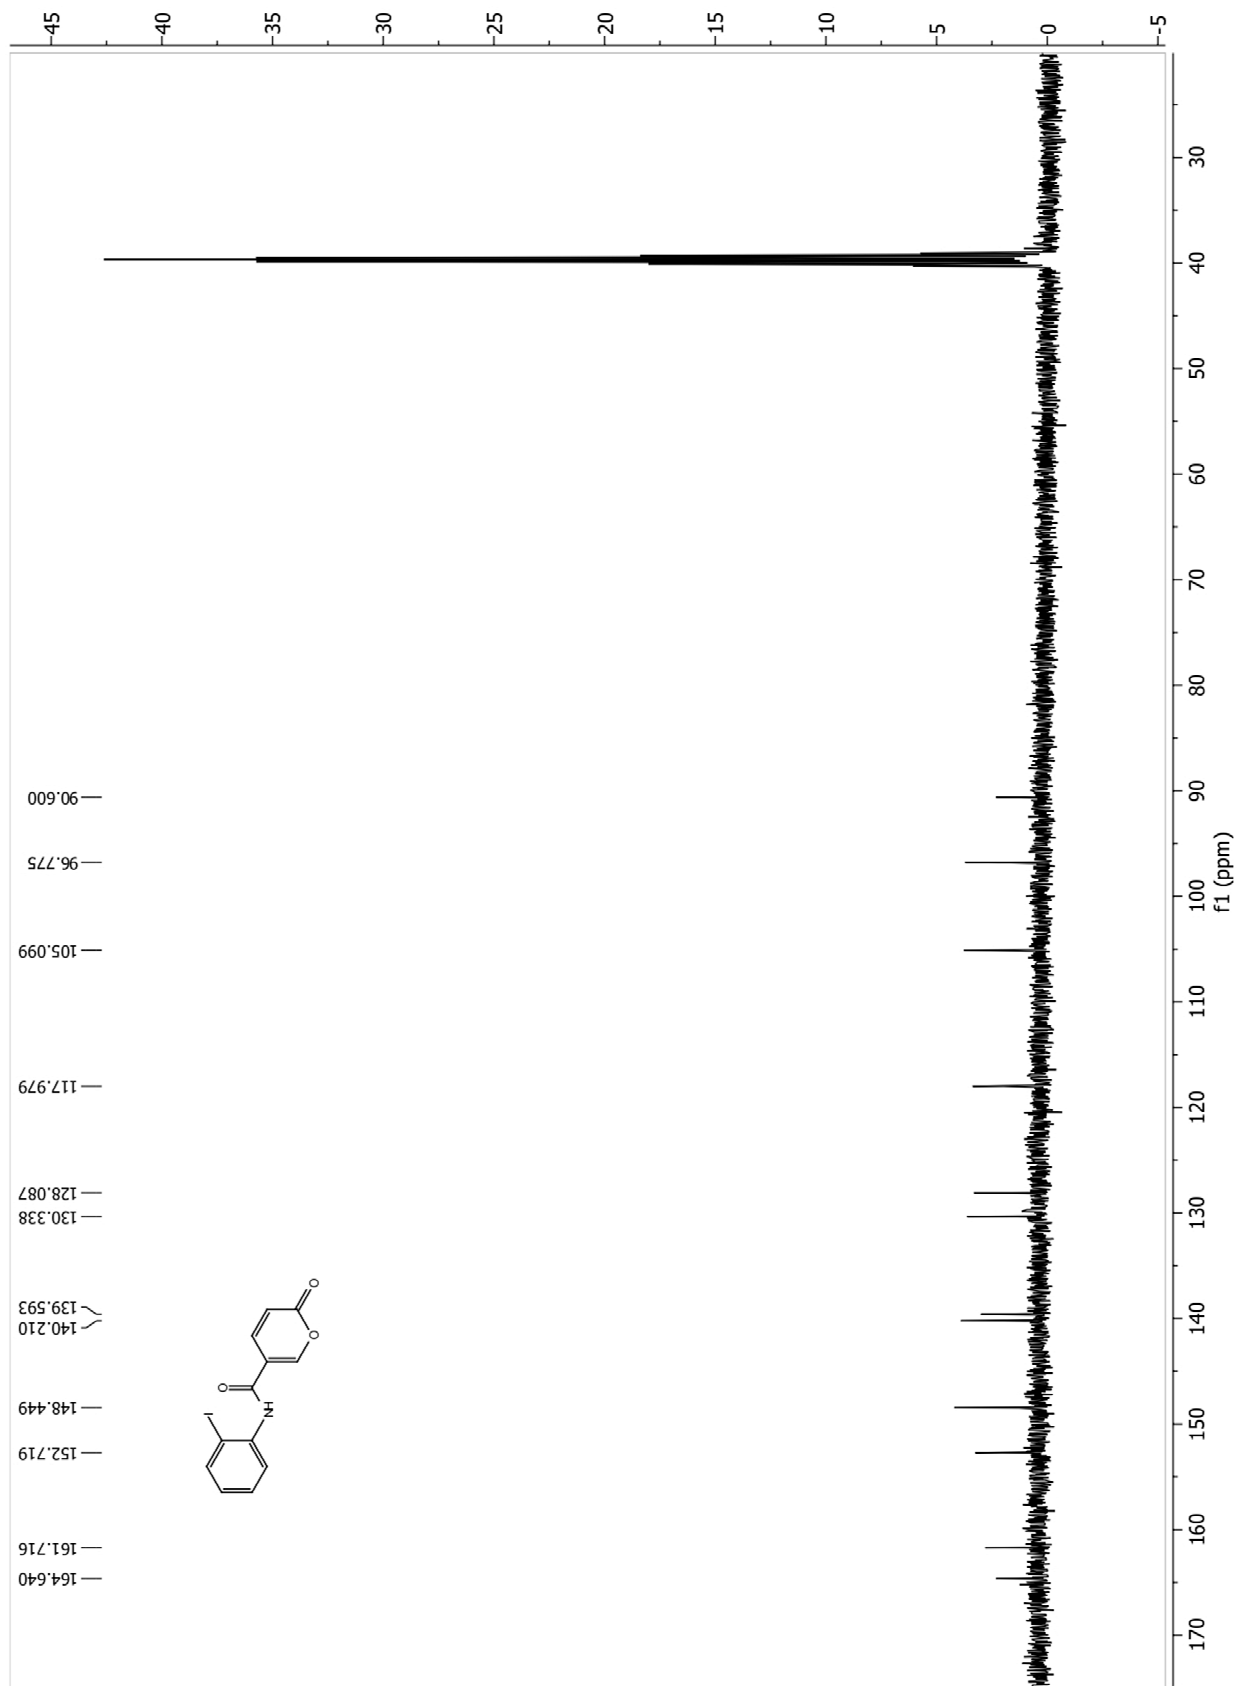

$^1\text{H}$  NMR spectrum of compound **11**

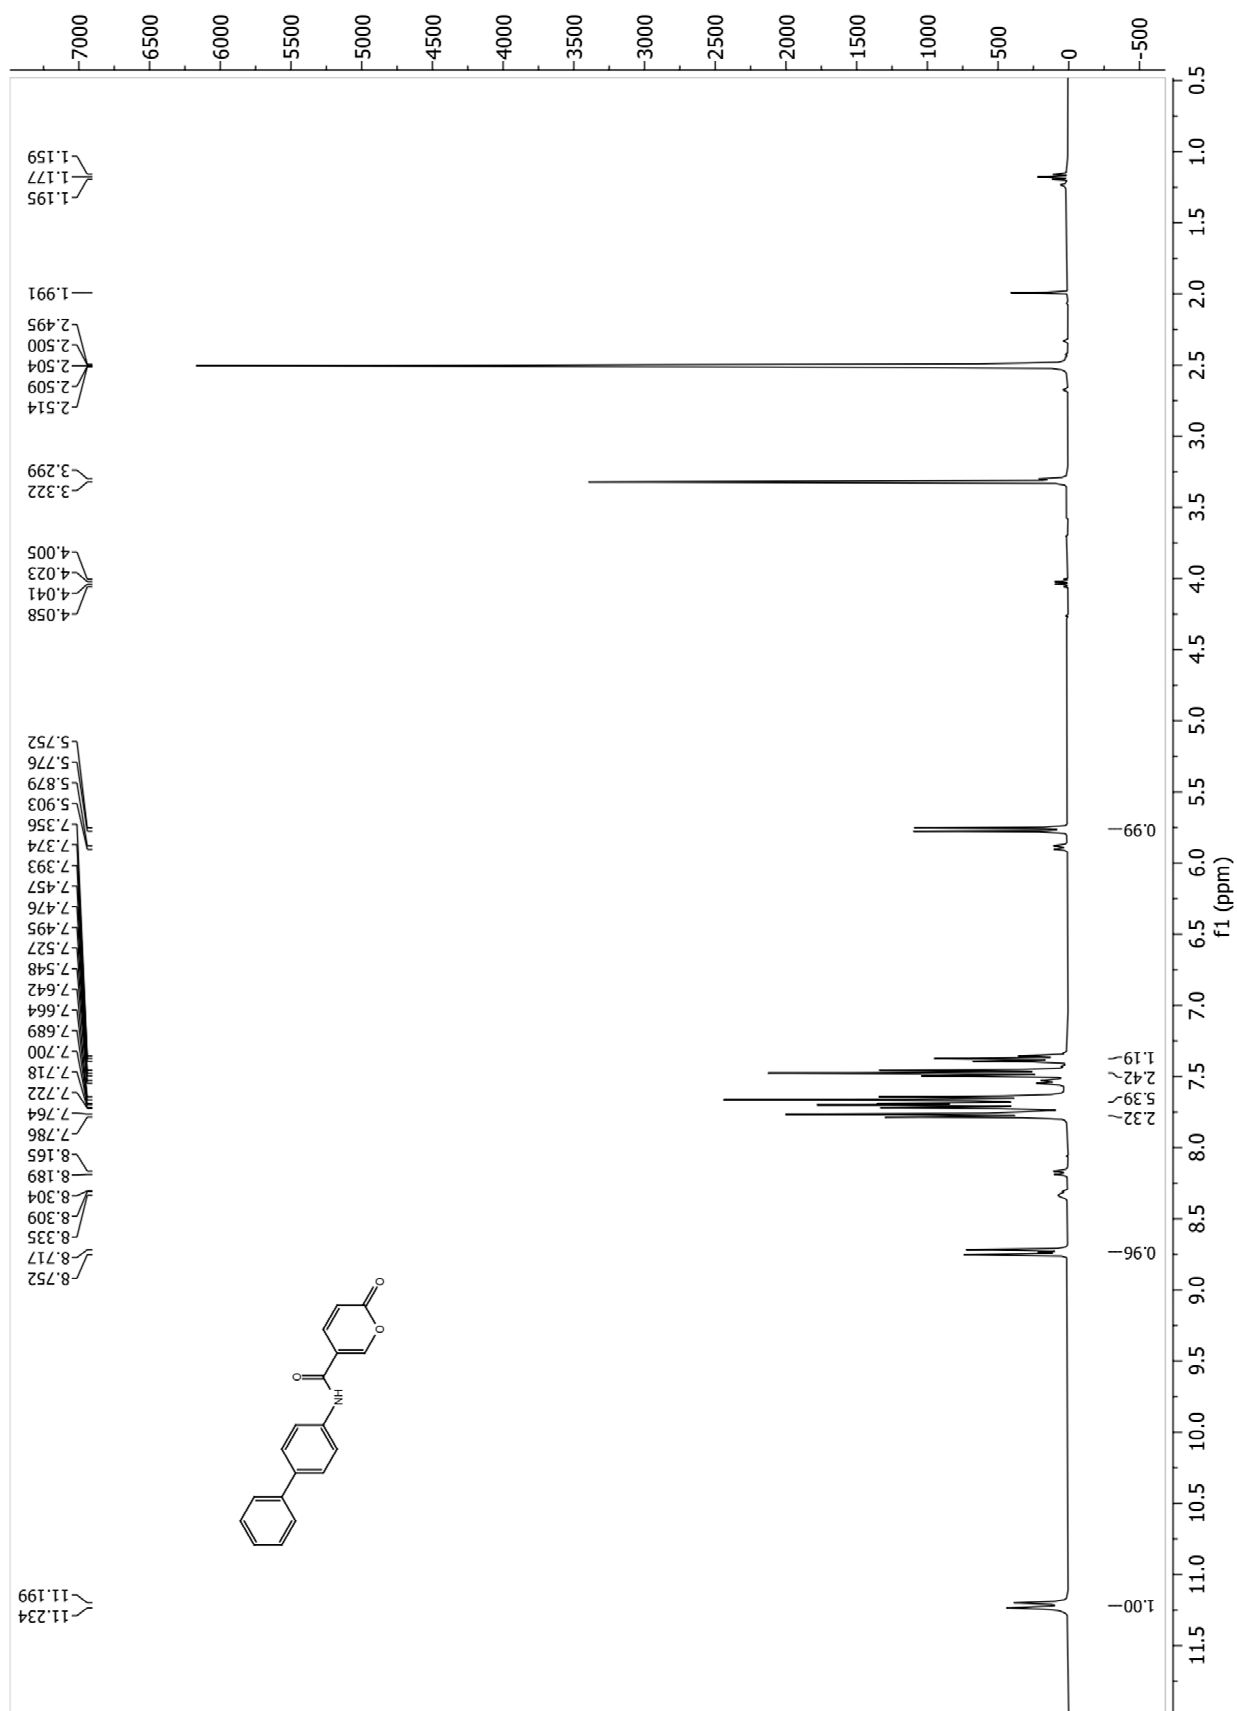

$^1\text{H}$ - $^1\text{H}$  NMR-NOESY spectrum of compound **11**

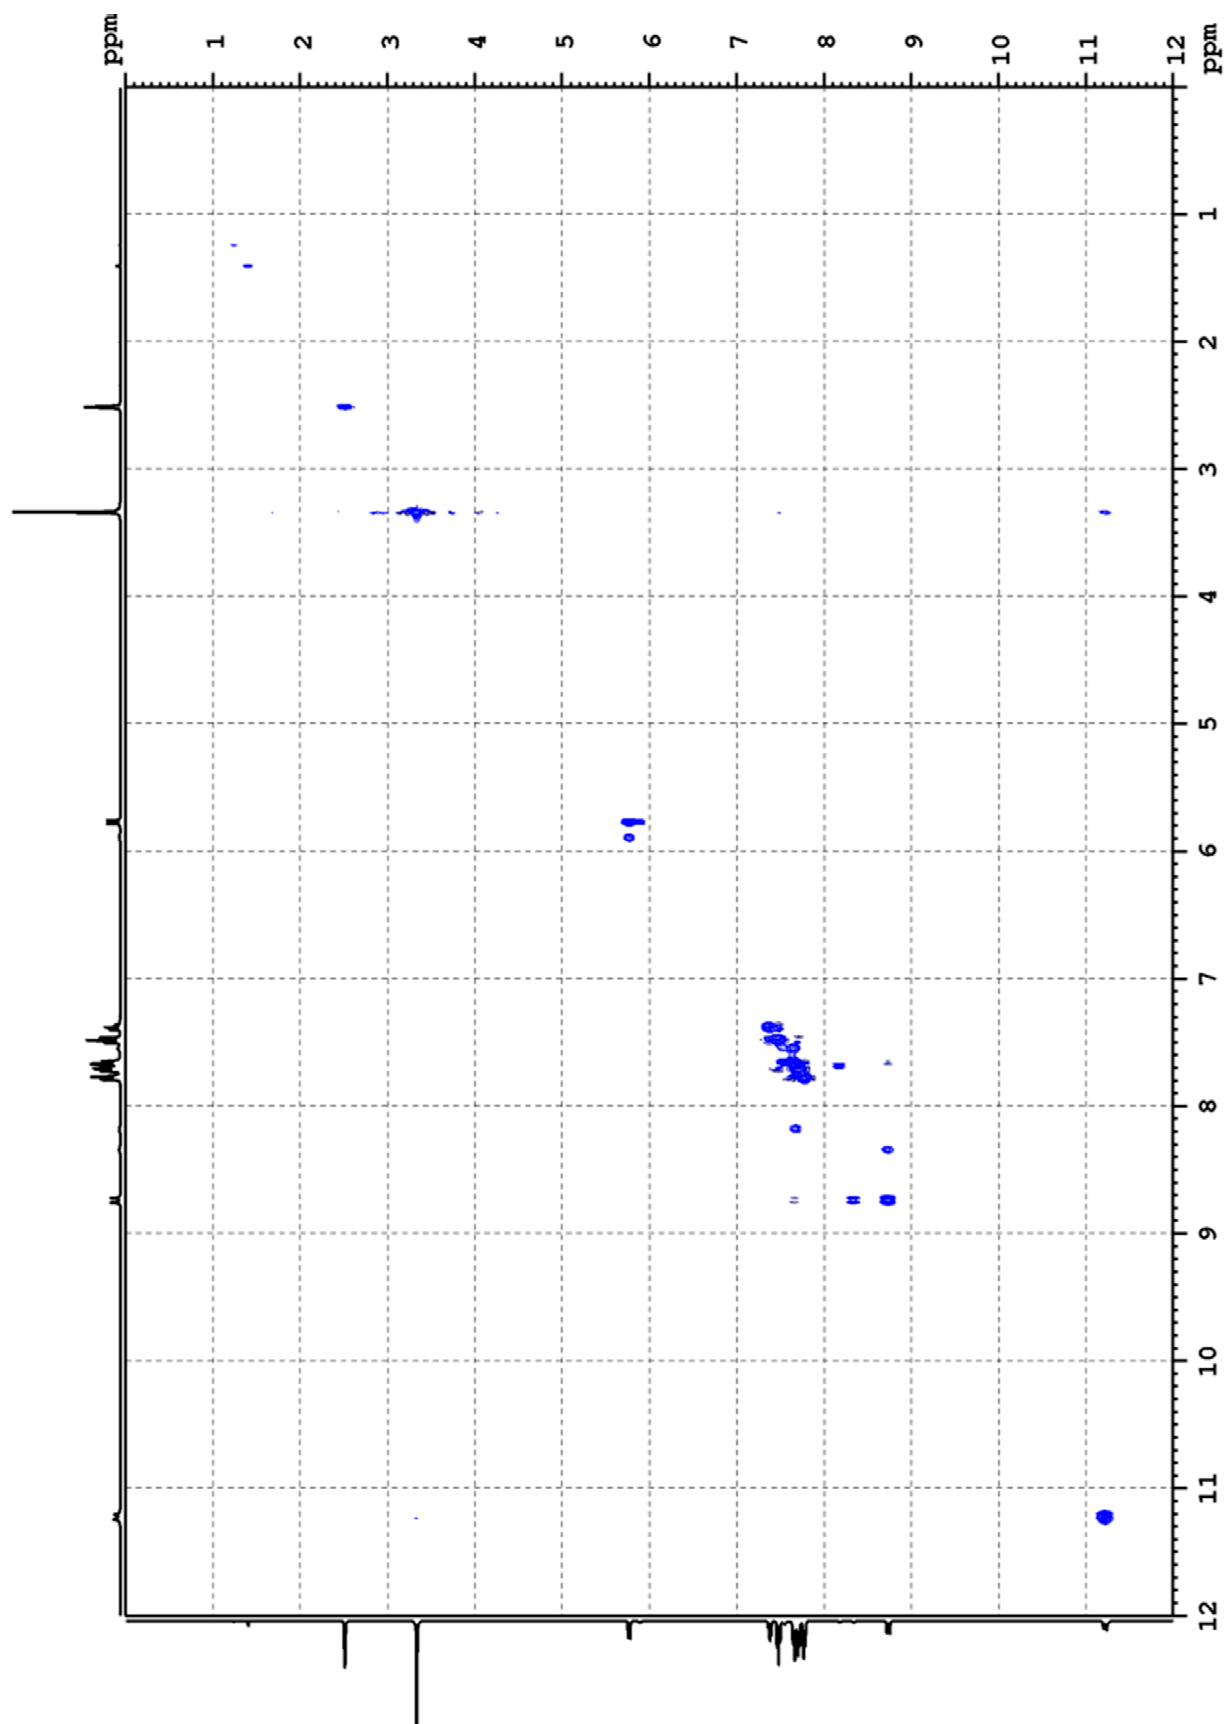



$^{13}\text{C}$  NMR spectrum of compound **11**

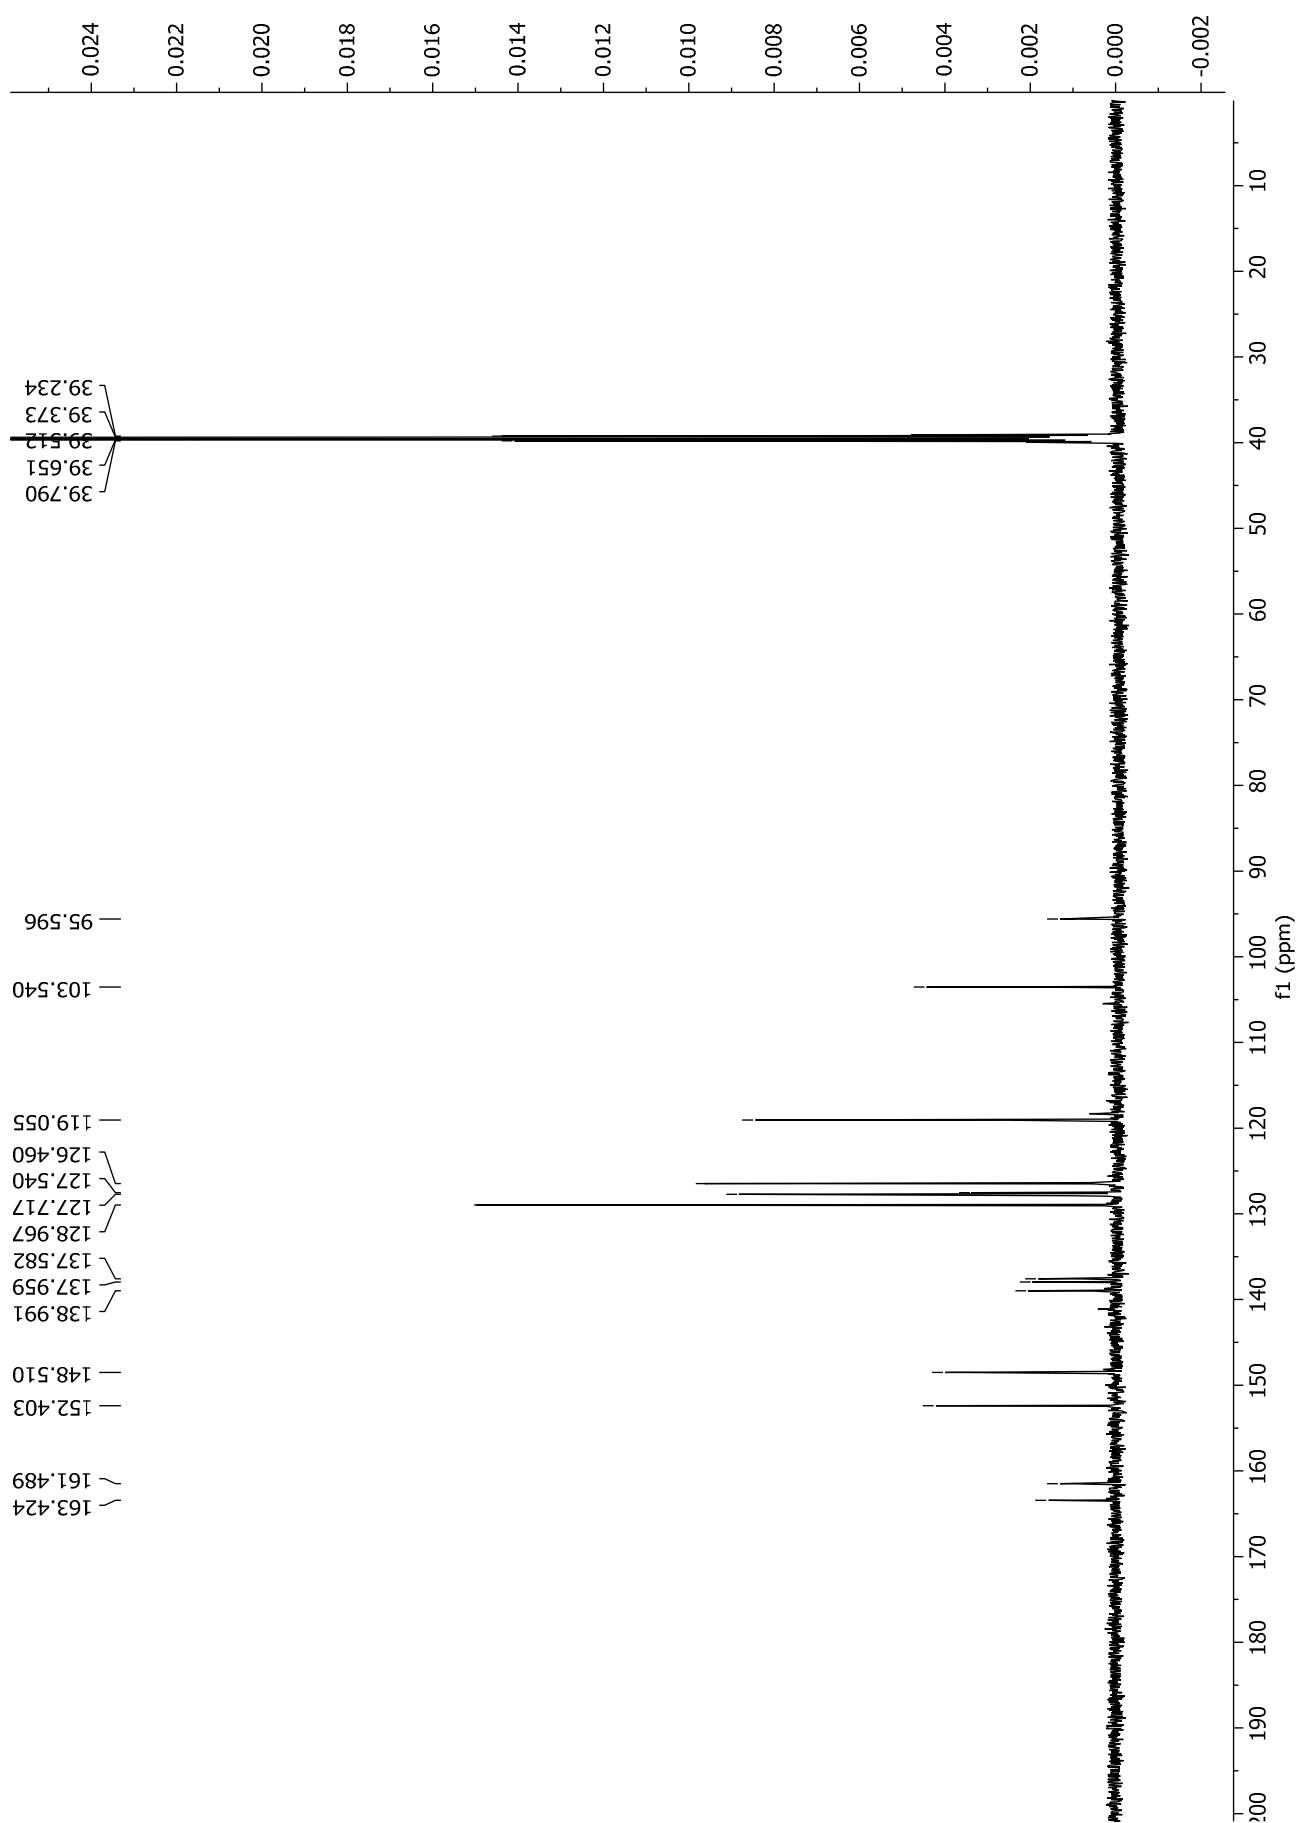

$^1\text{H}$ - $^{13}\text{C}$  HSQC spectrum of compound 11

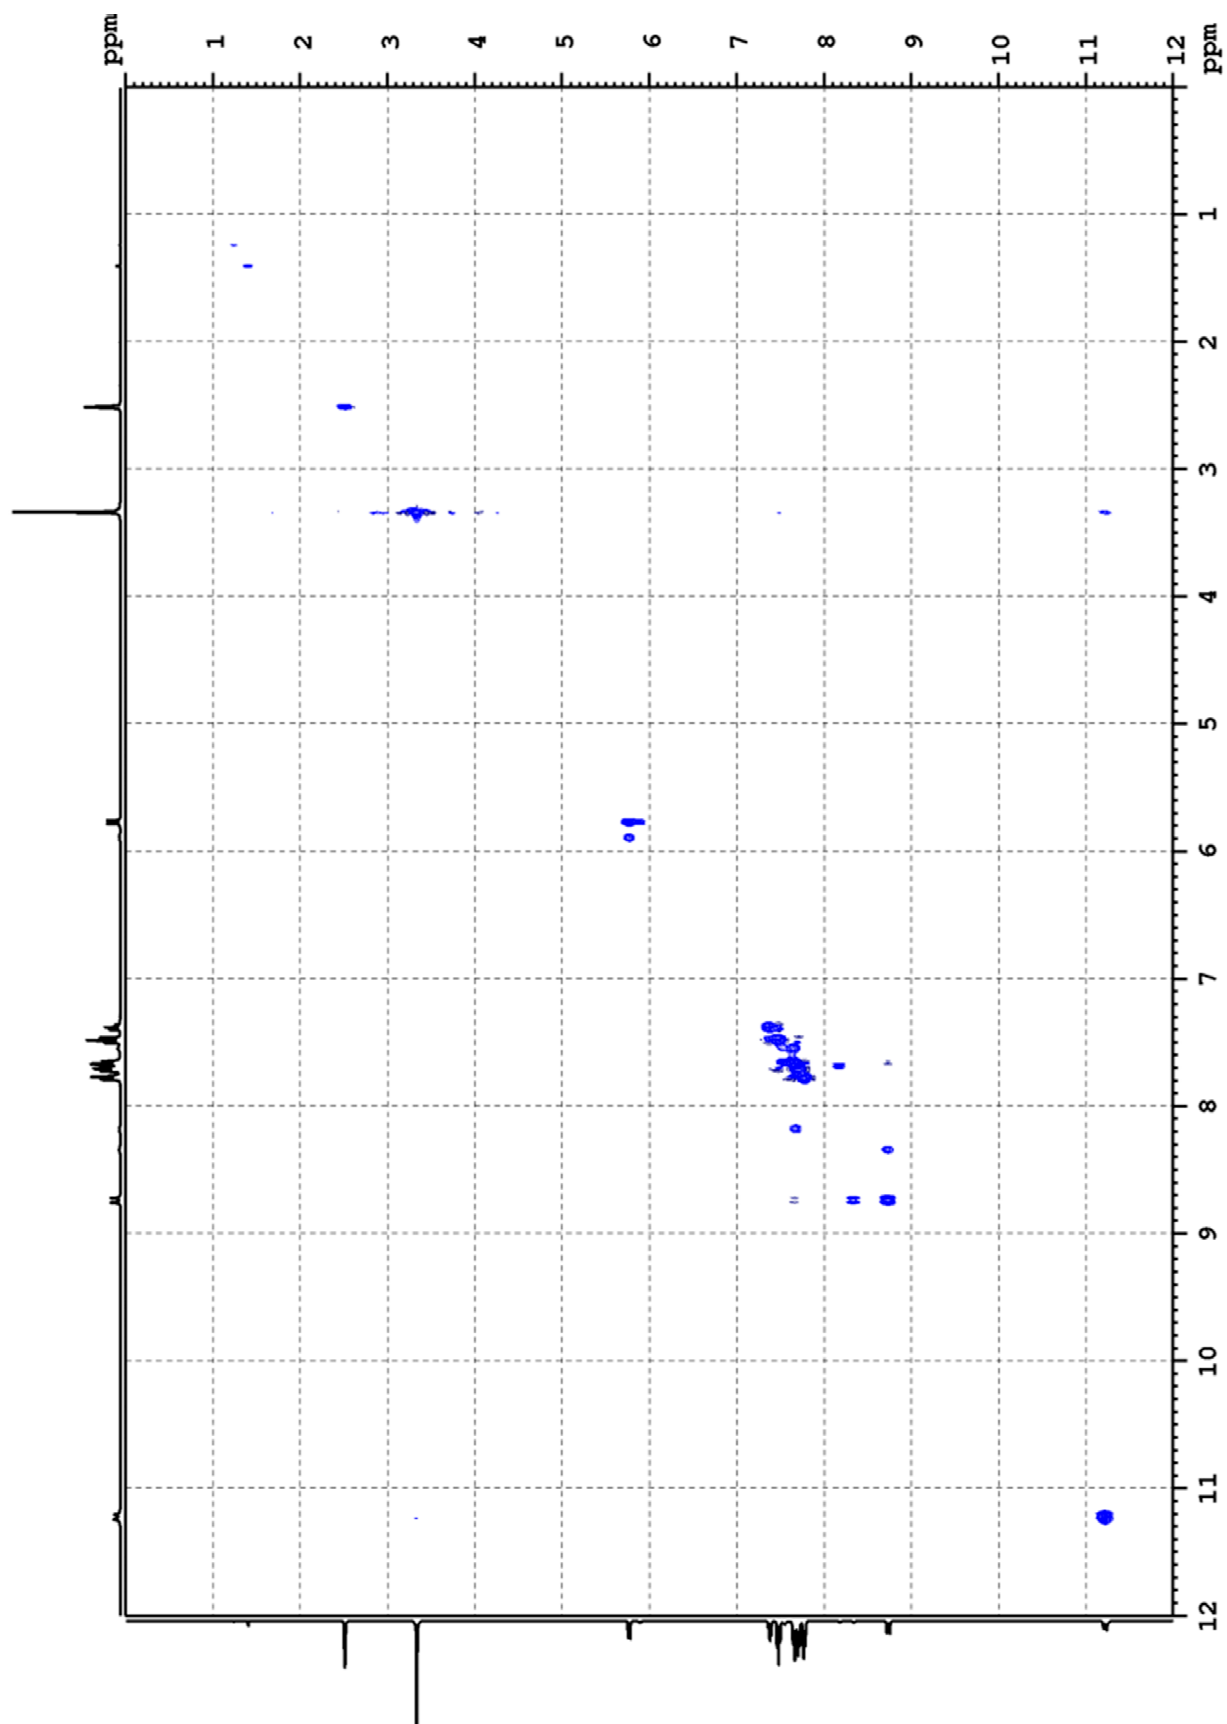

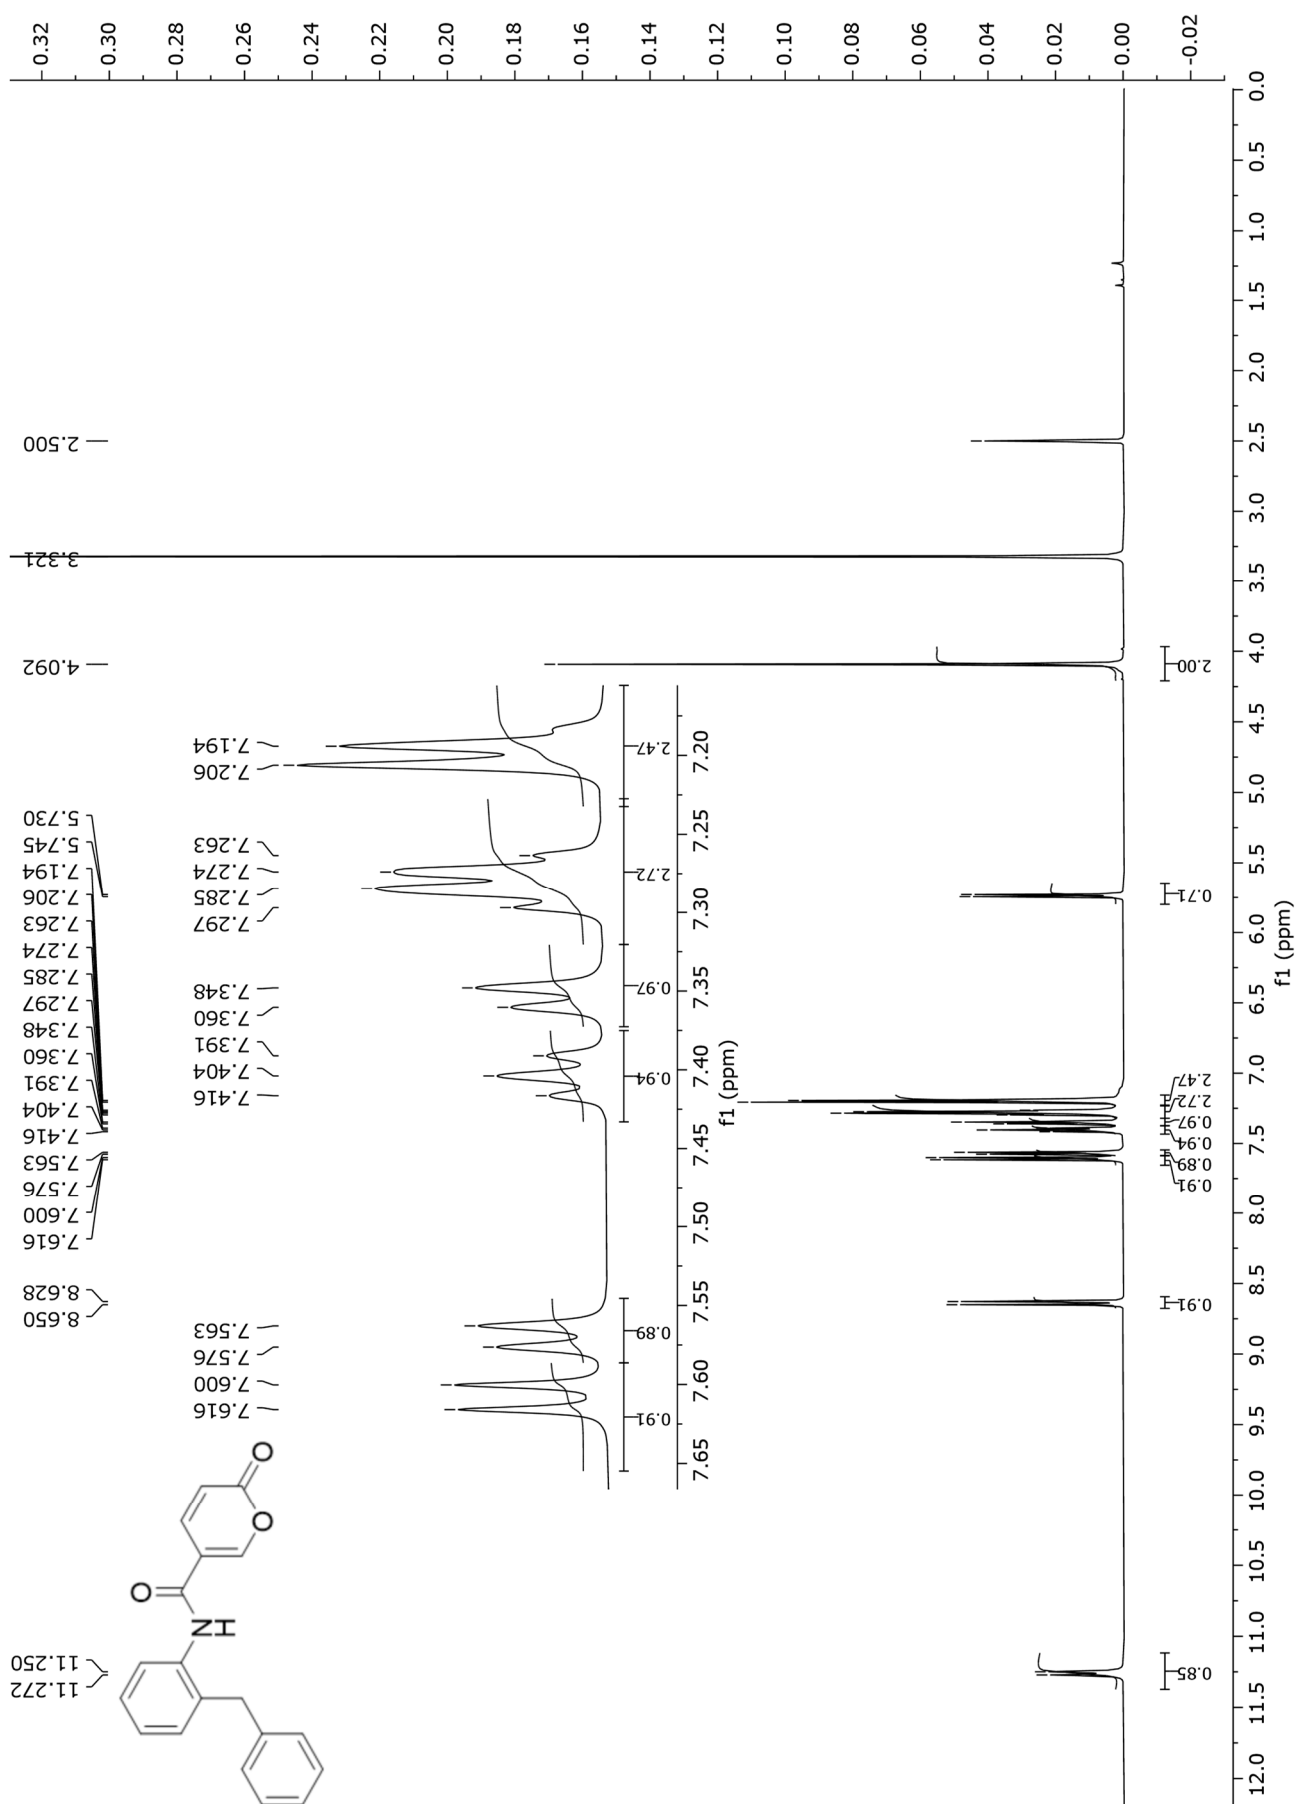

<sup>13</sup>C NMR spectrum of compound **12**

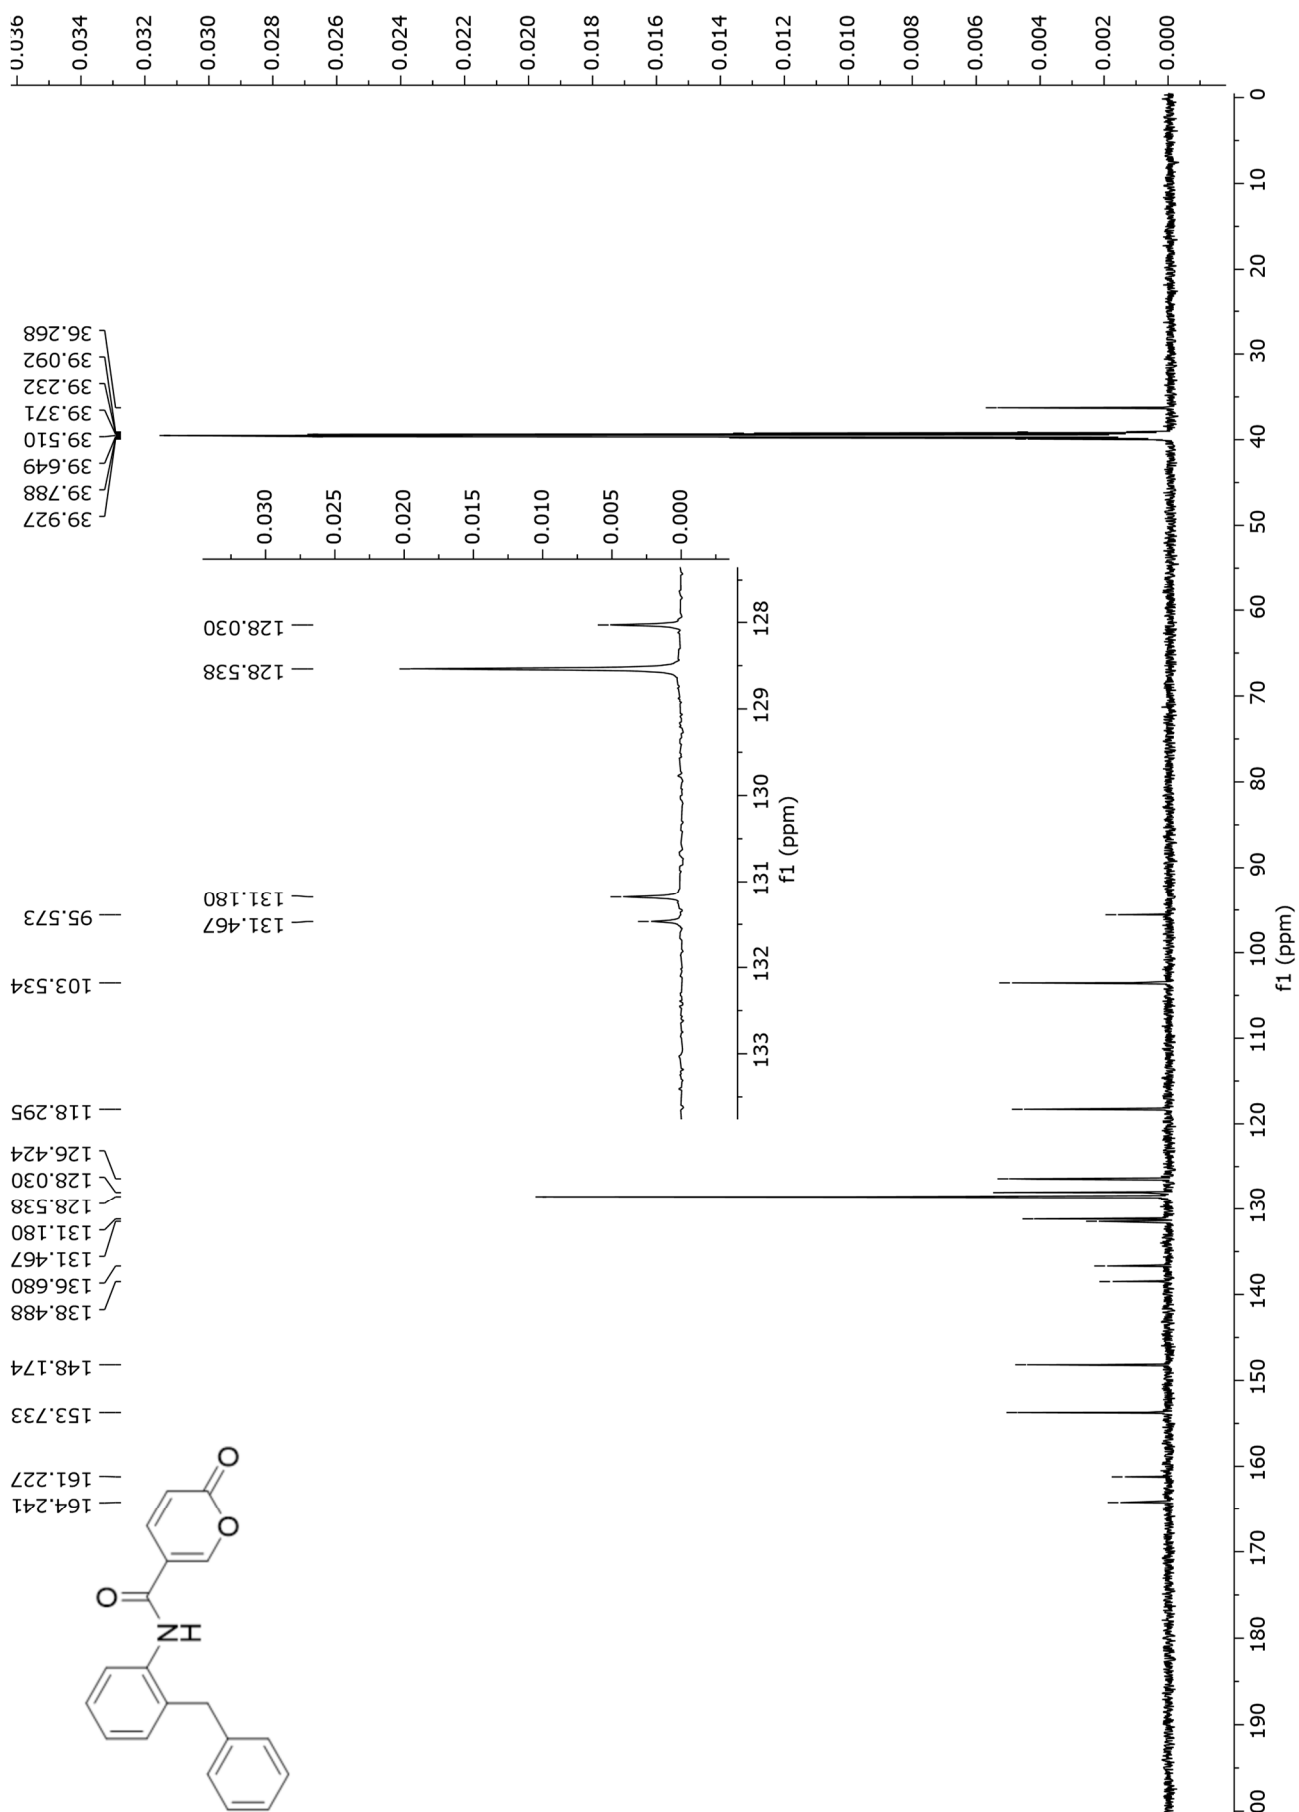

$^1\text{H}$  NMR spectrum of compound **13**

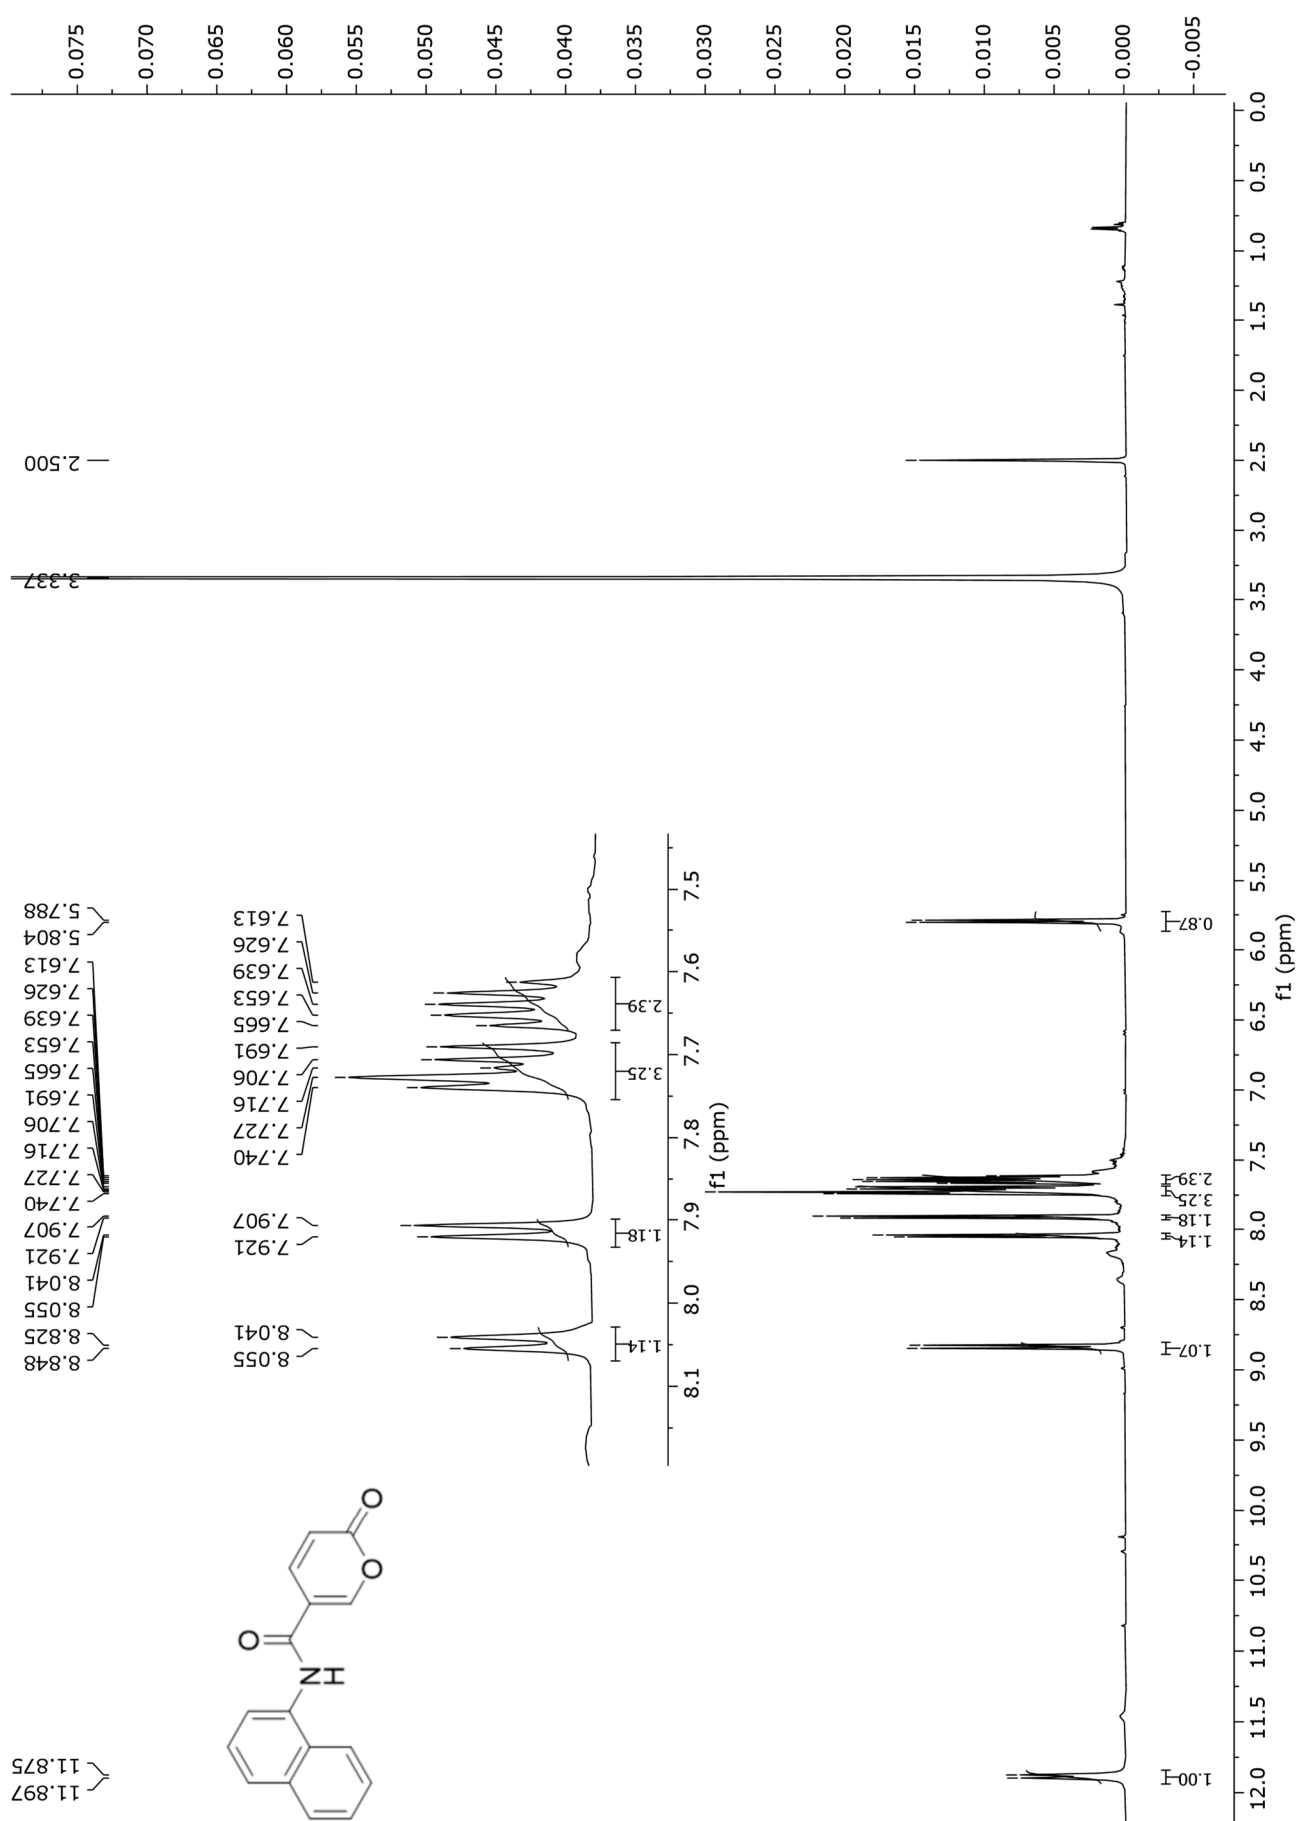

<sup>13</sup>C NMR spectrum of compound **13**

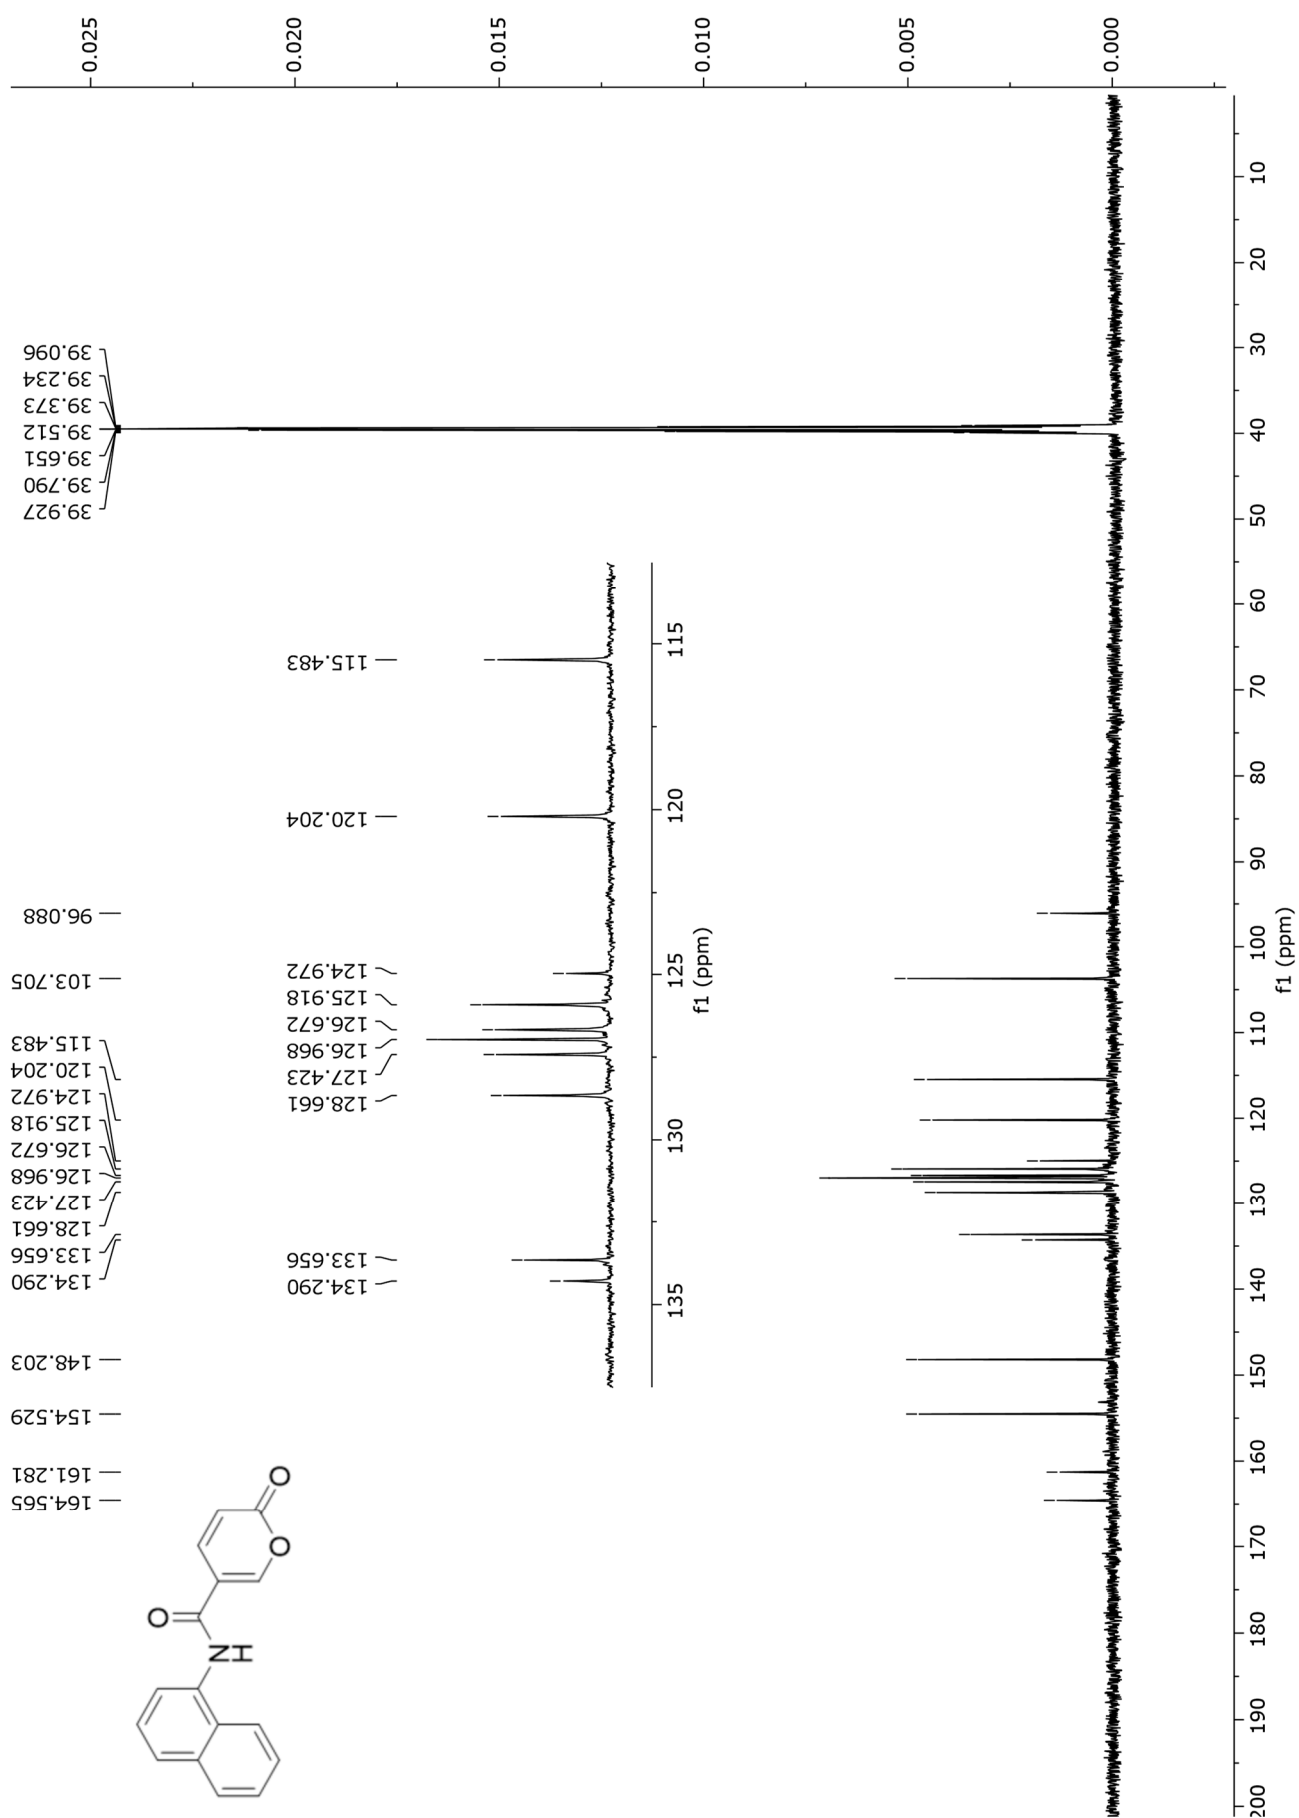

$^1\text{H}$  NMR spectrum of compound **14**

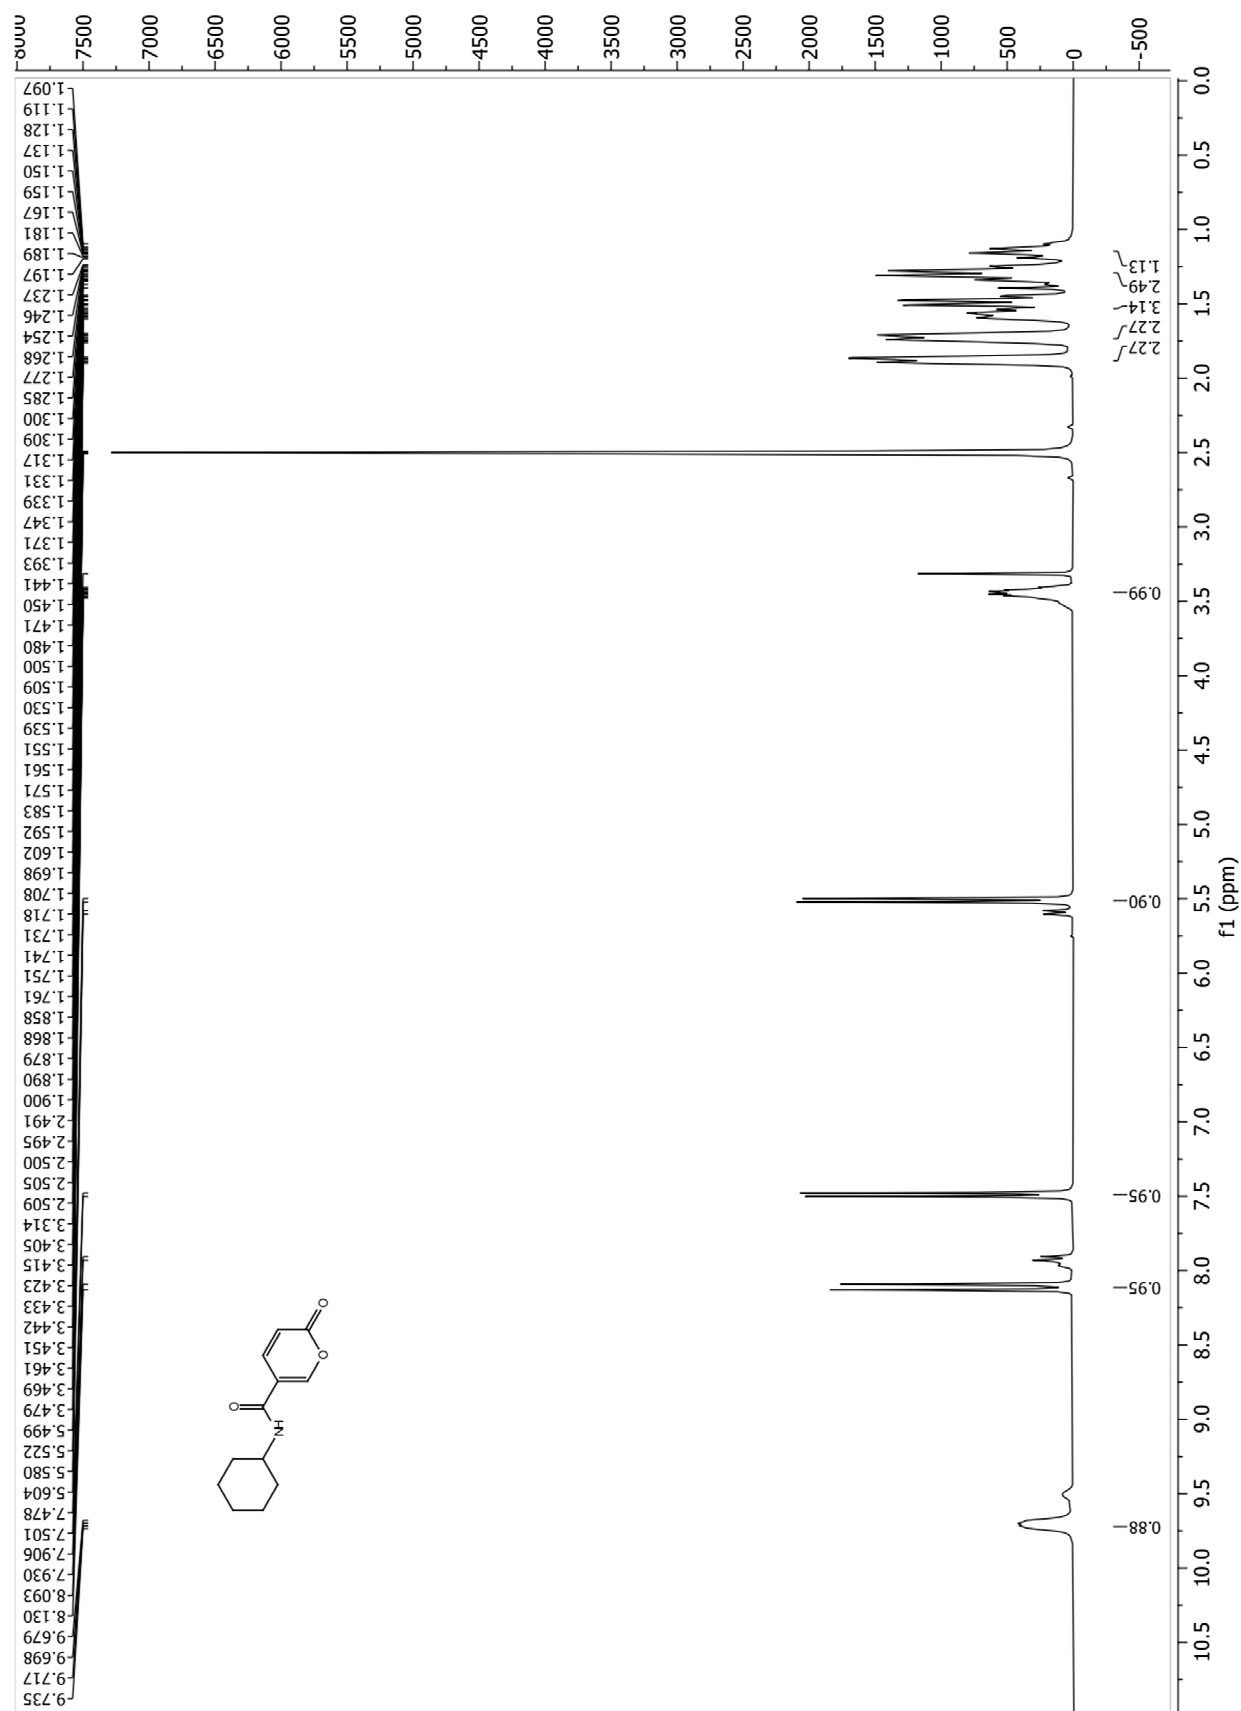

$^1\text{H}$  NMR spectrum of compound **14** without (a) and in presence (b) of  $\text{D}_2\text{O}$

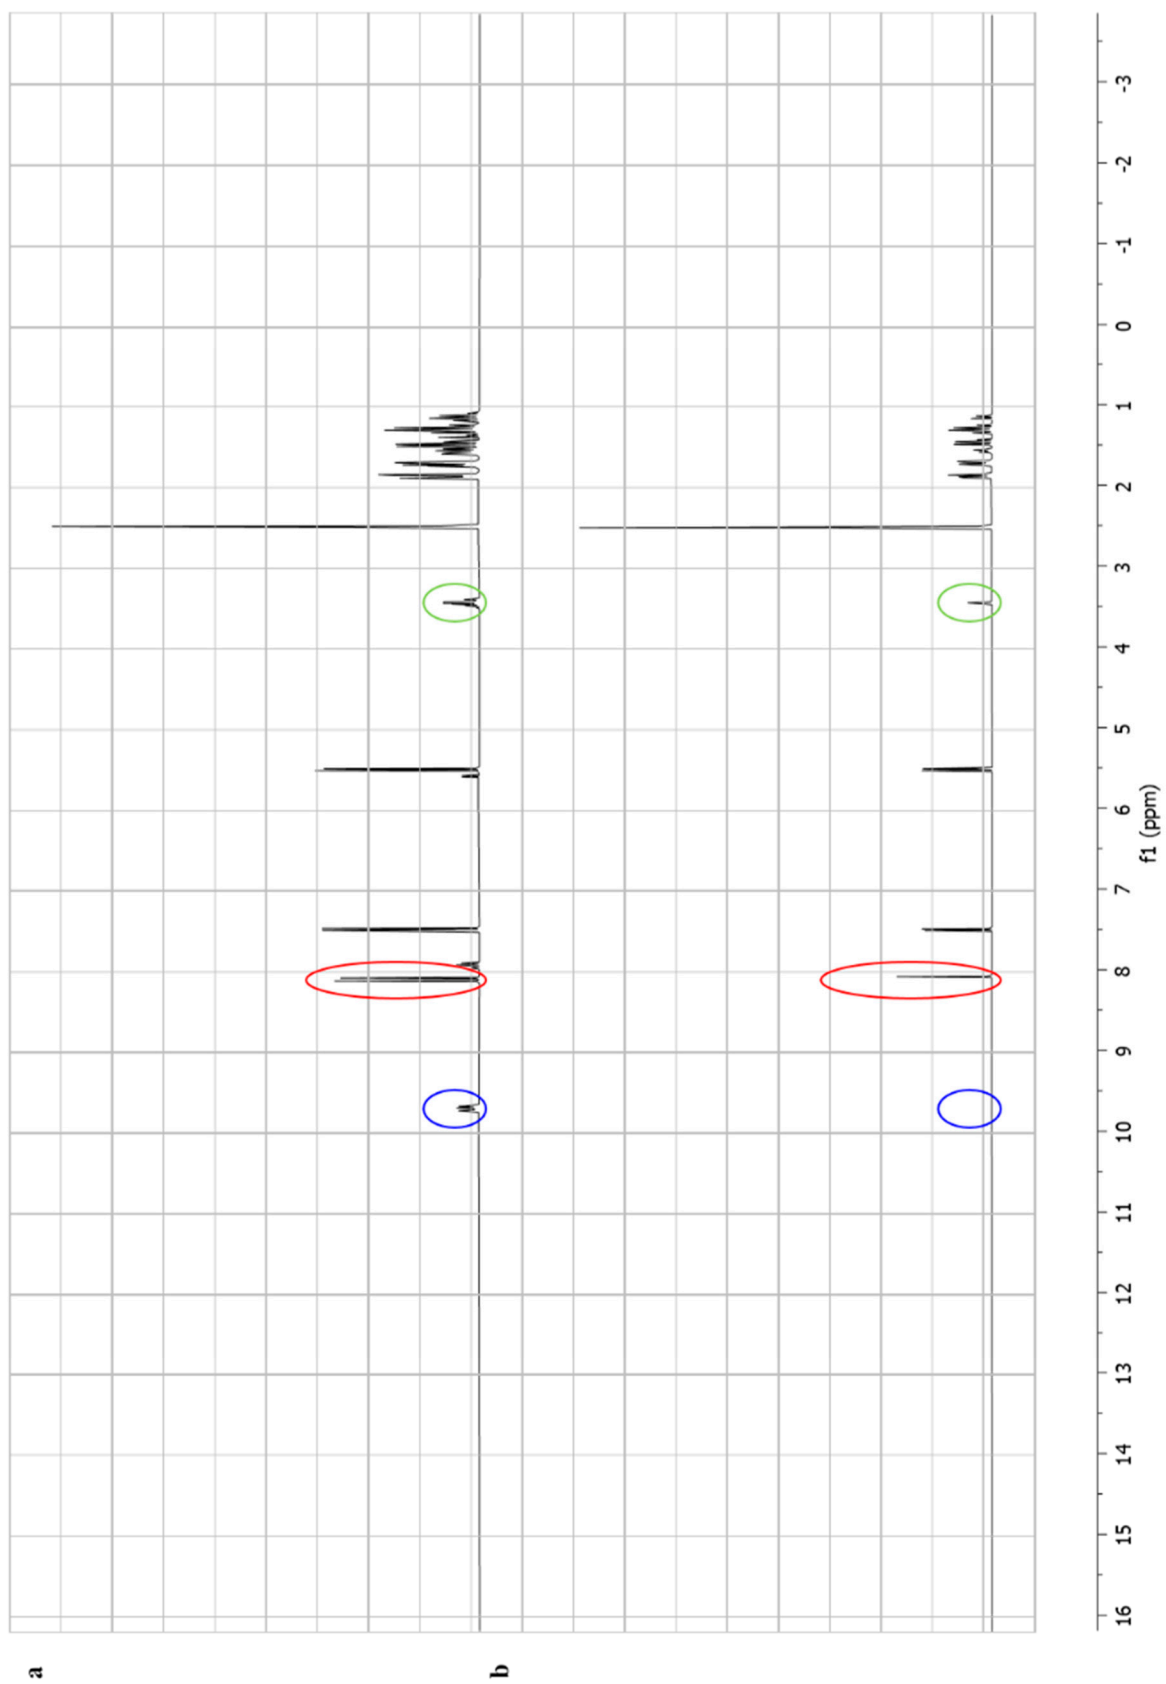



$^1\text{H}$ - $^1\text{H}$  NMR-COSY spectrum of compound **14**

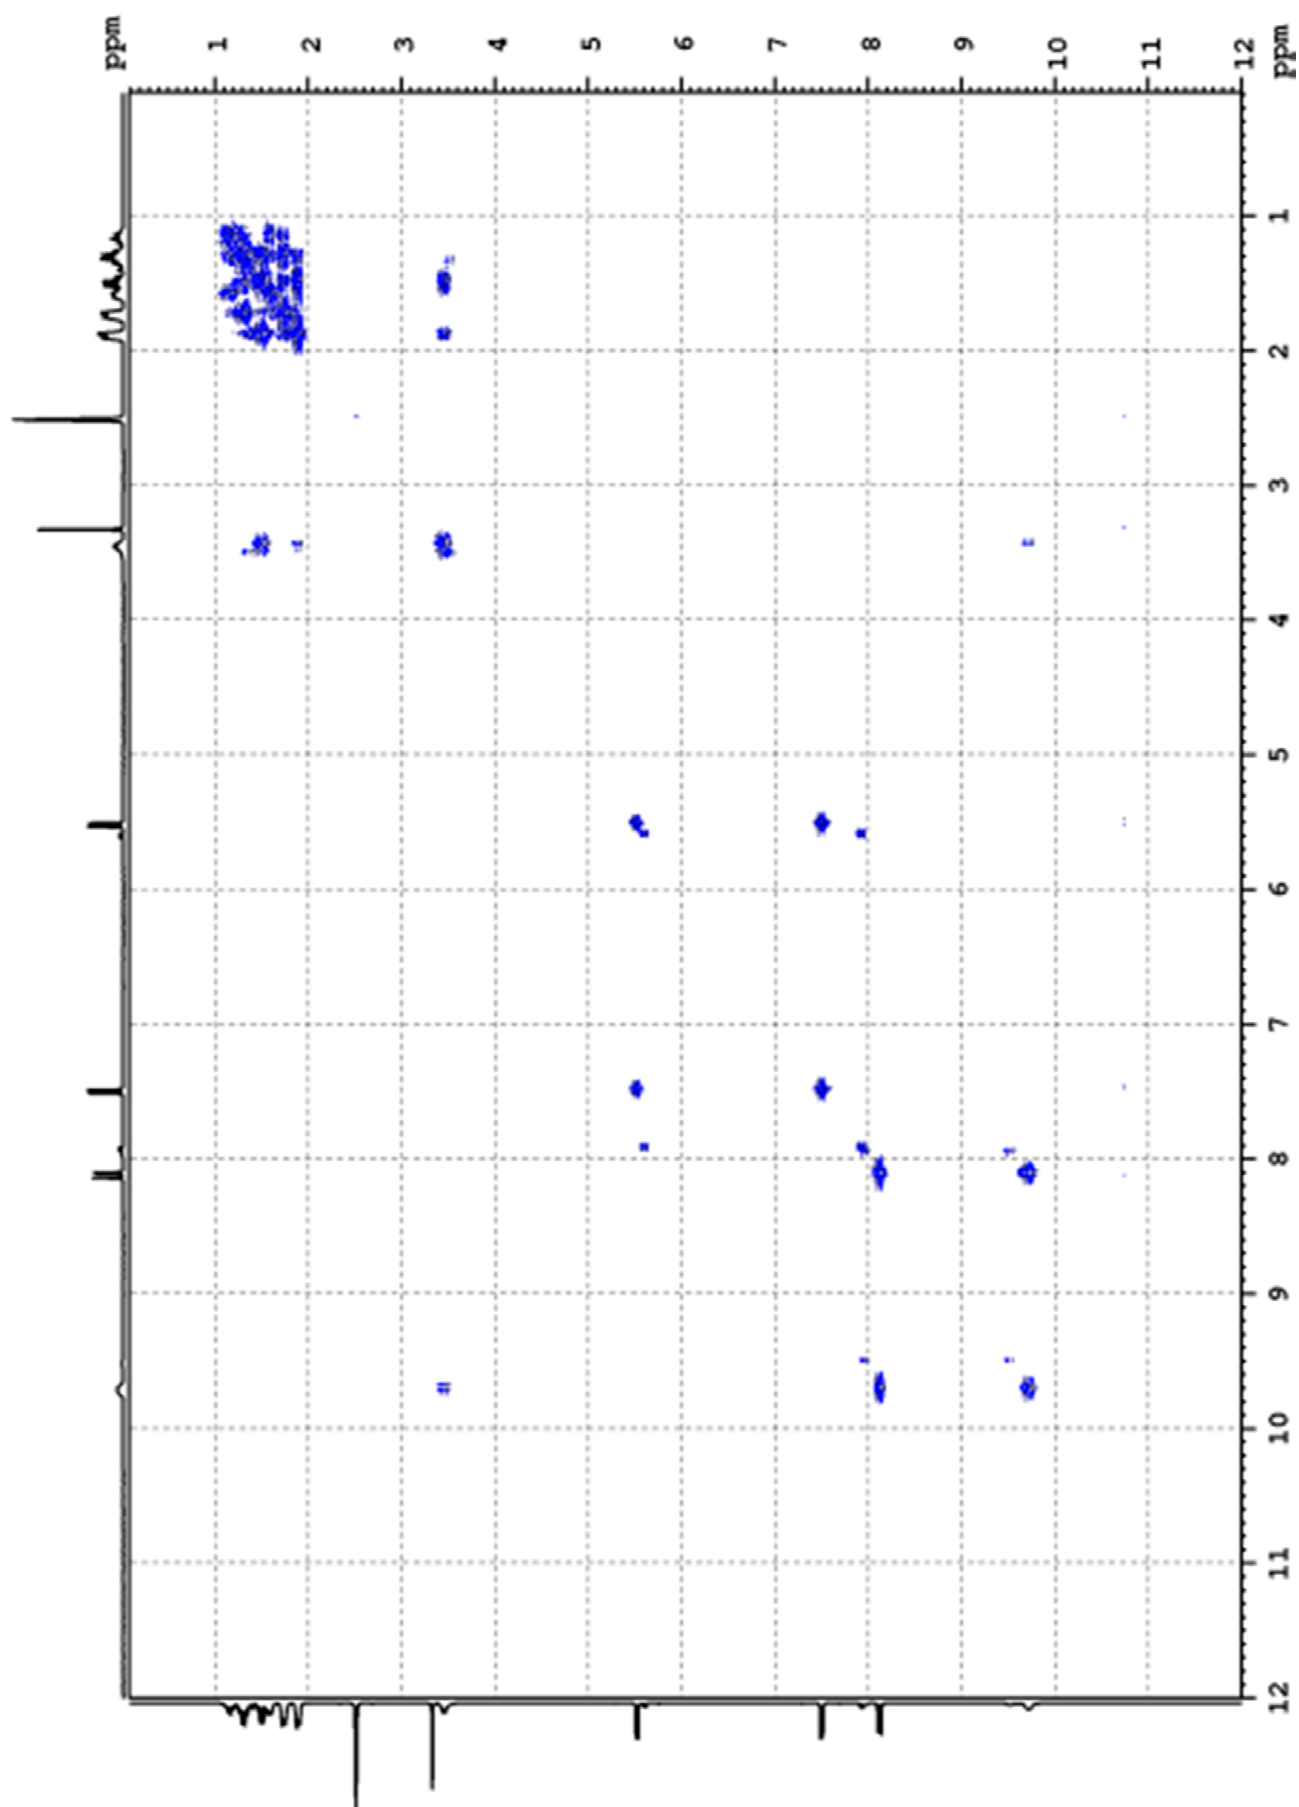

$^1\text{H}$ - $^1\text{H}$  NMR-NOESY spectrum of compound **14**

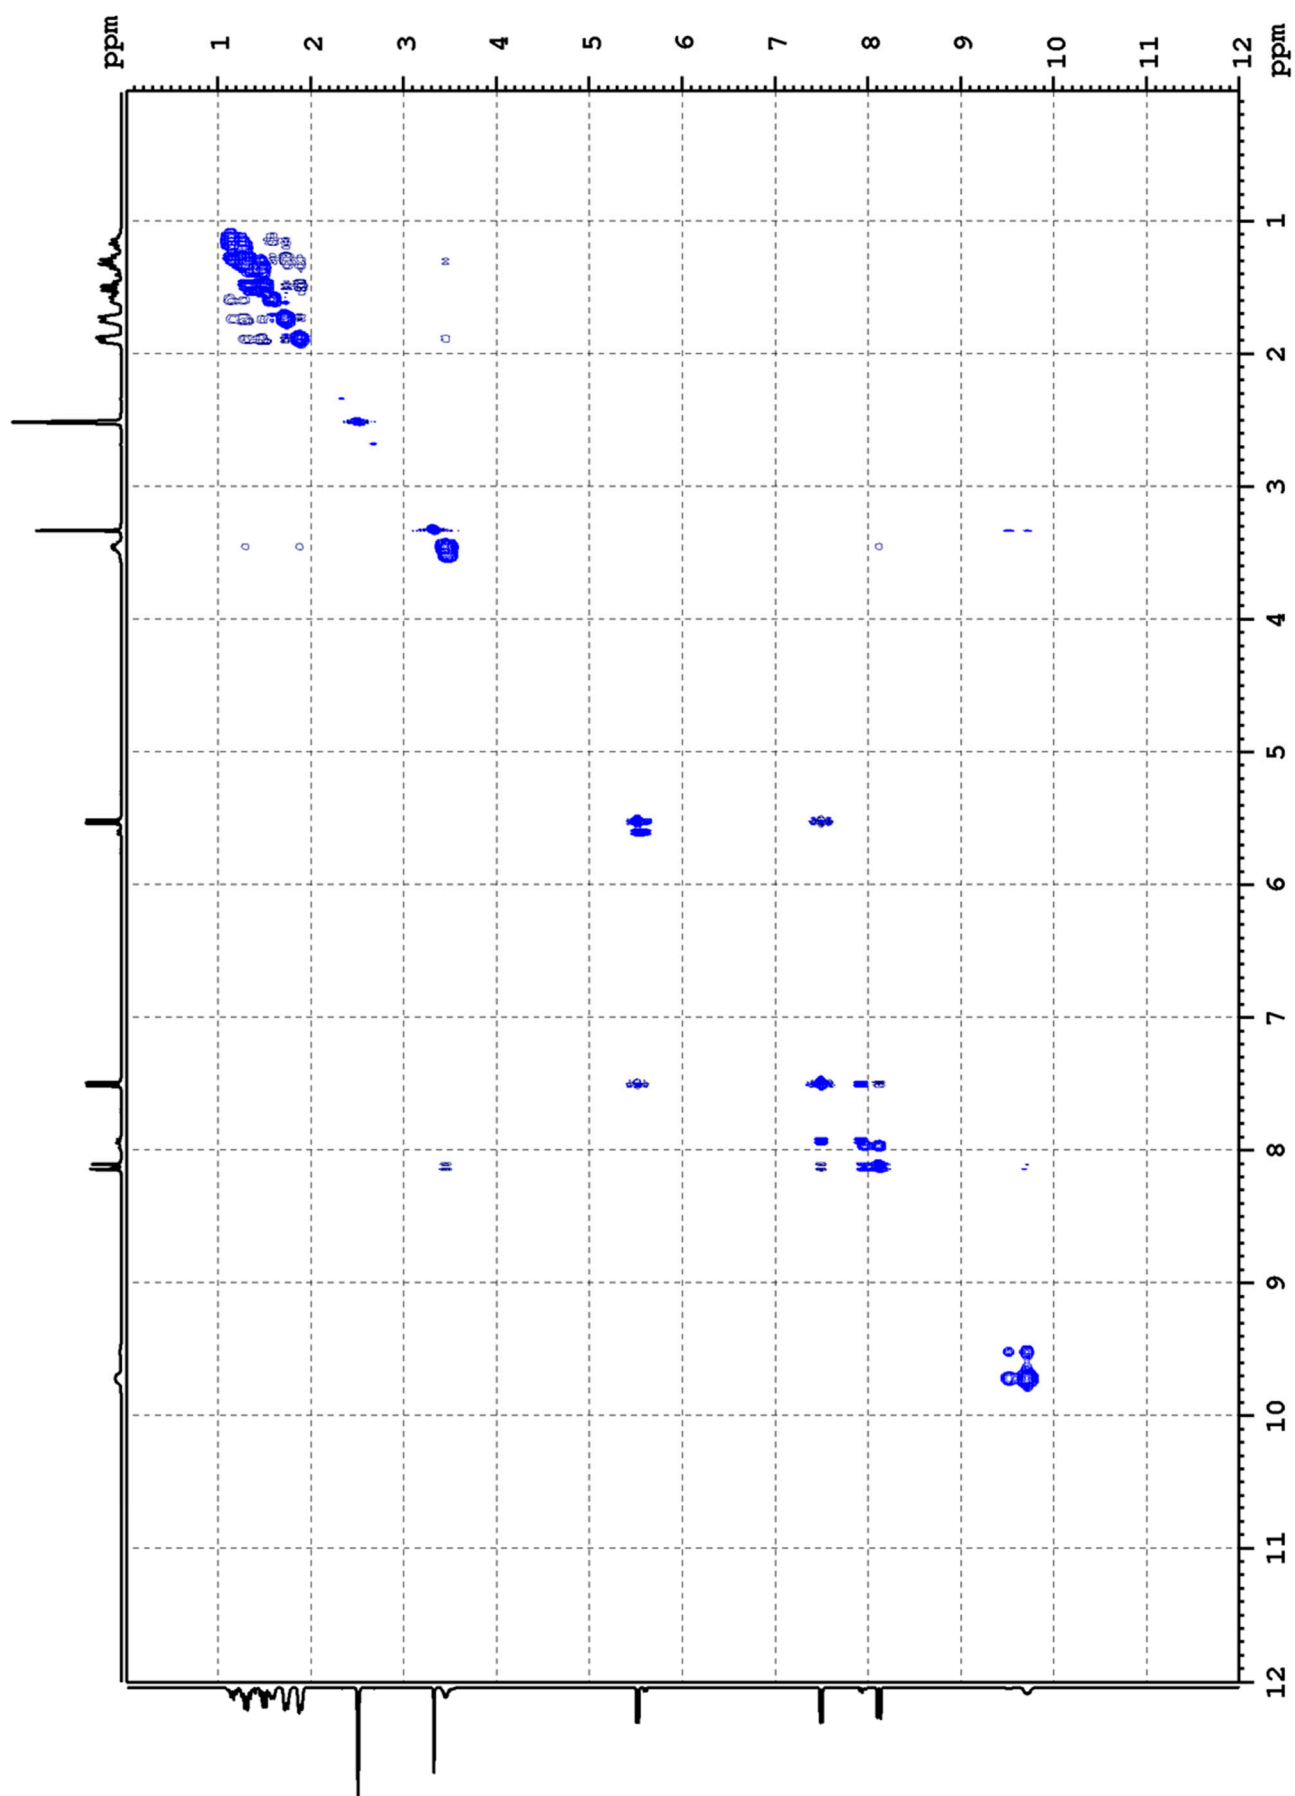

$^{13}\text{C}$  NMR spectrum of compound **14**

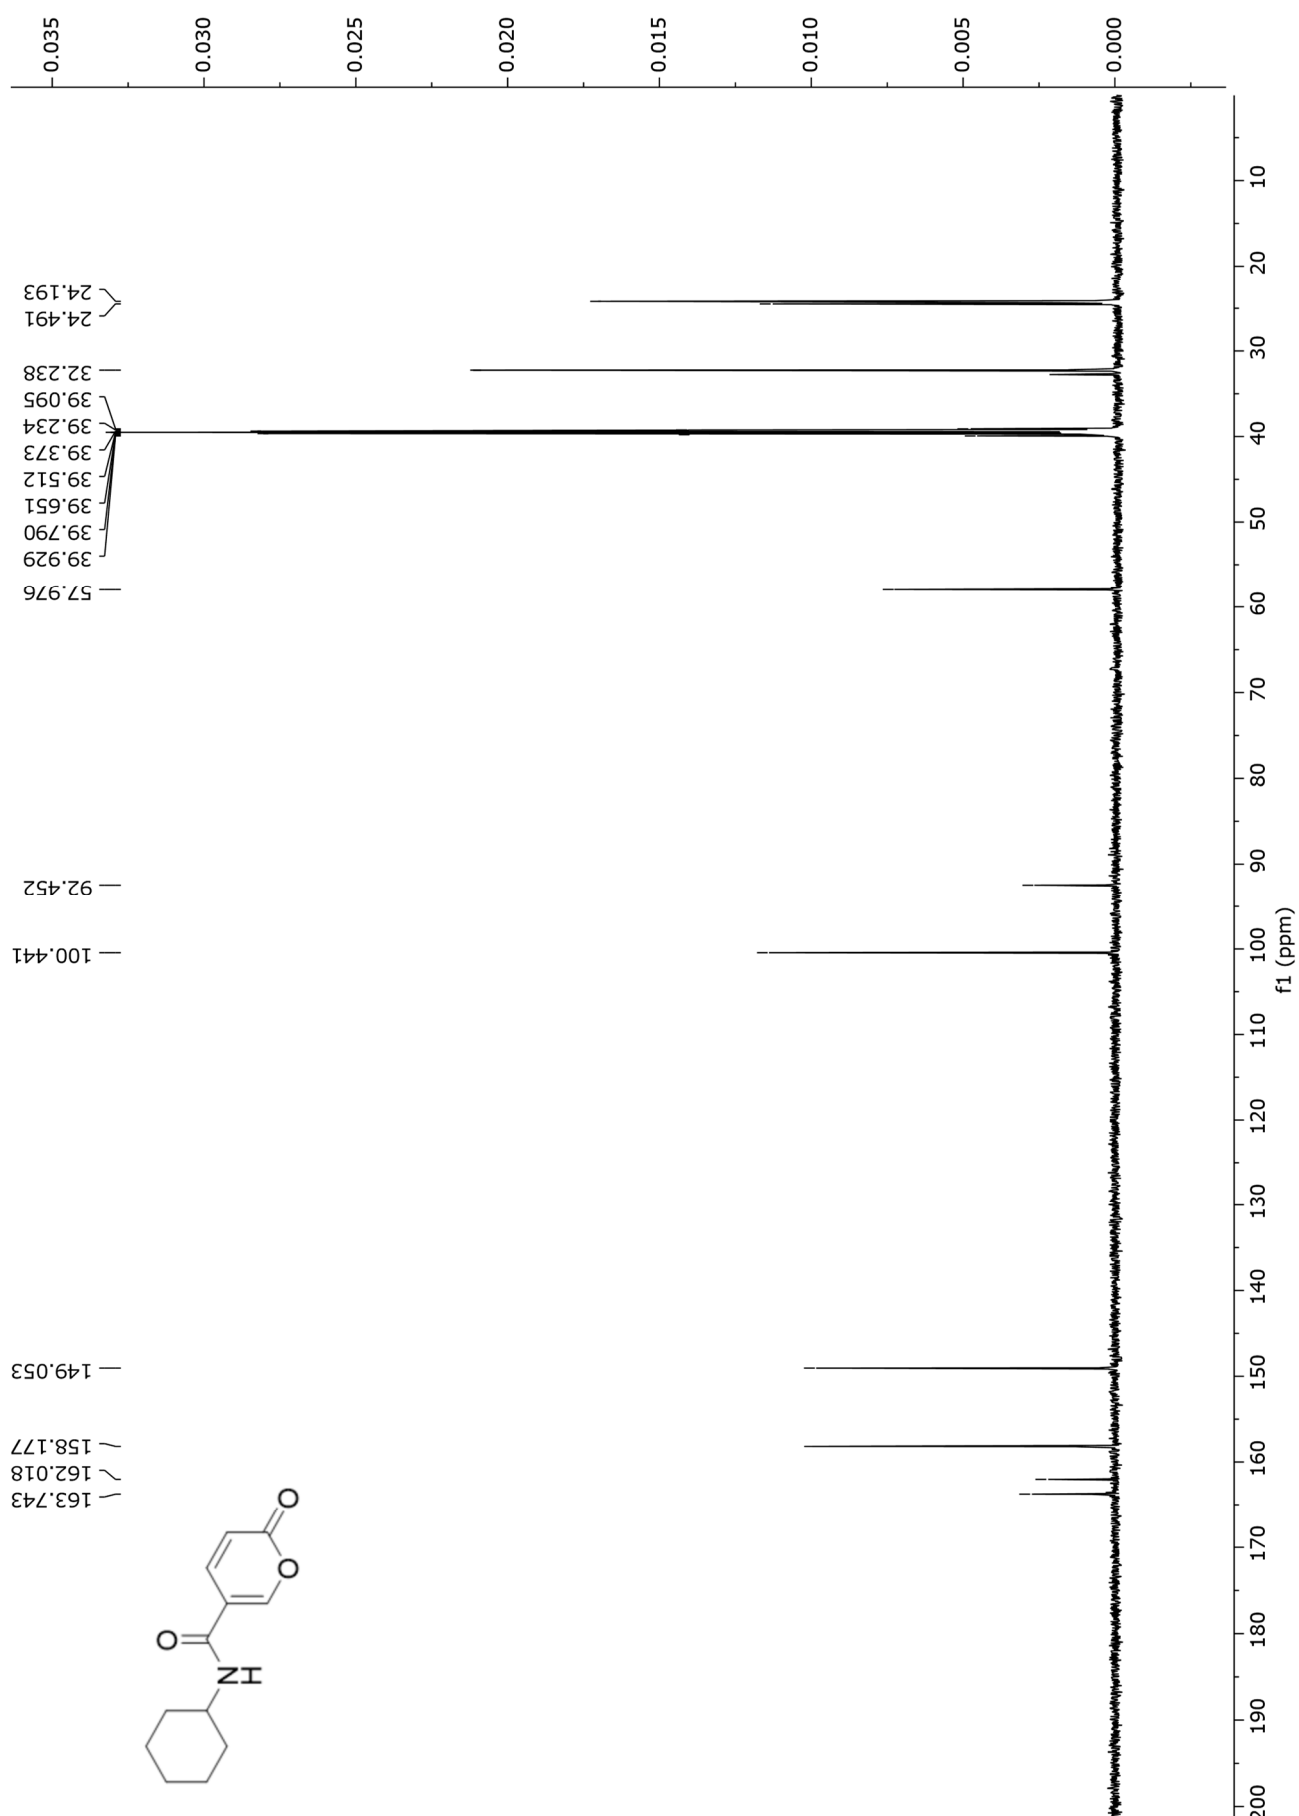

$^1\text{H}$  NMR spectrum of compound **15**

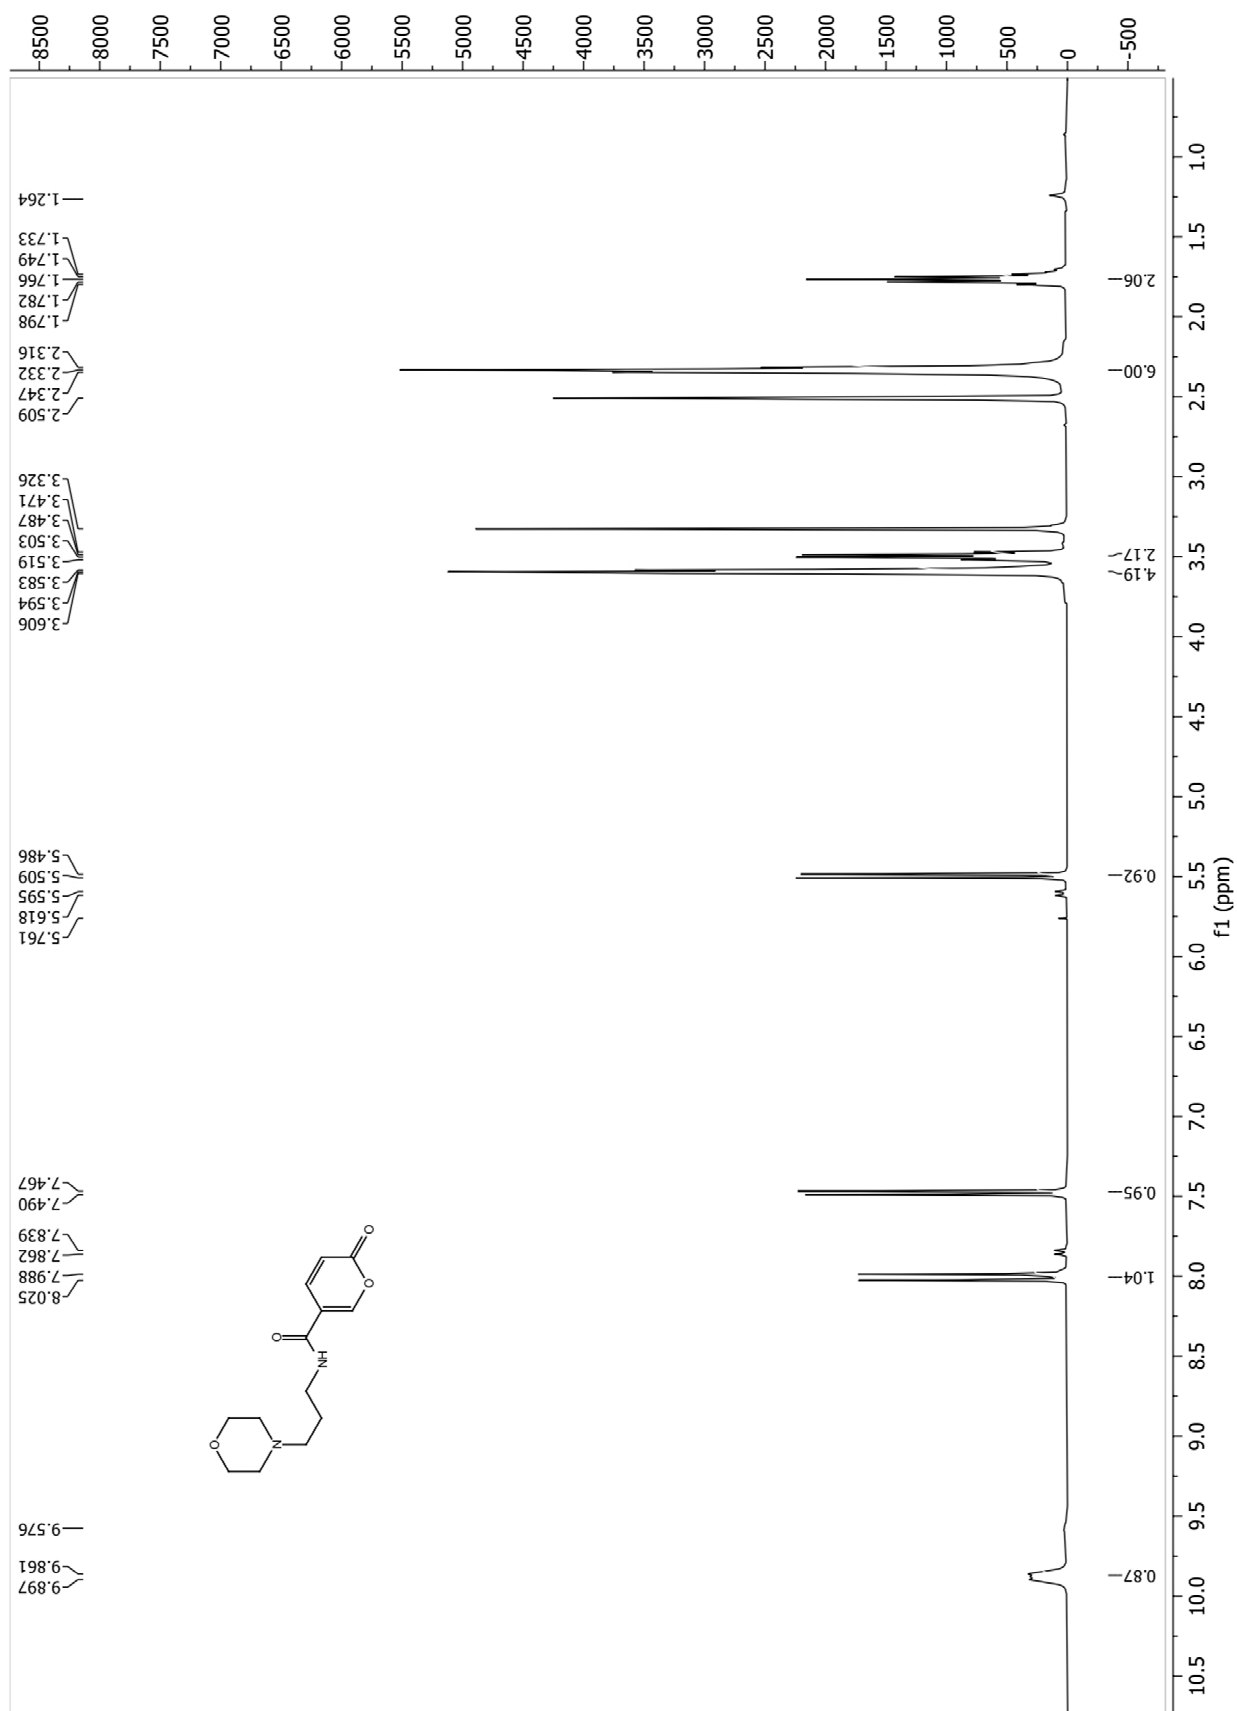

$^{13}\text{C}$  NMR spectrum of compound **15**

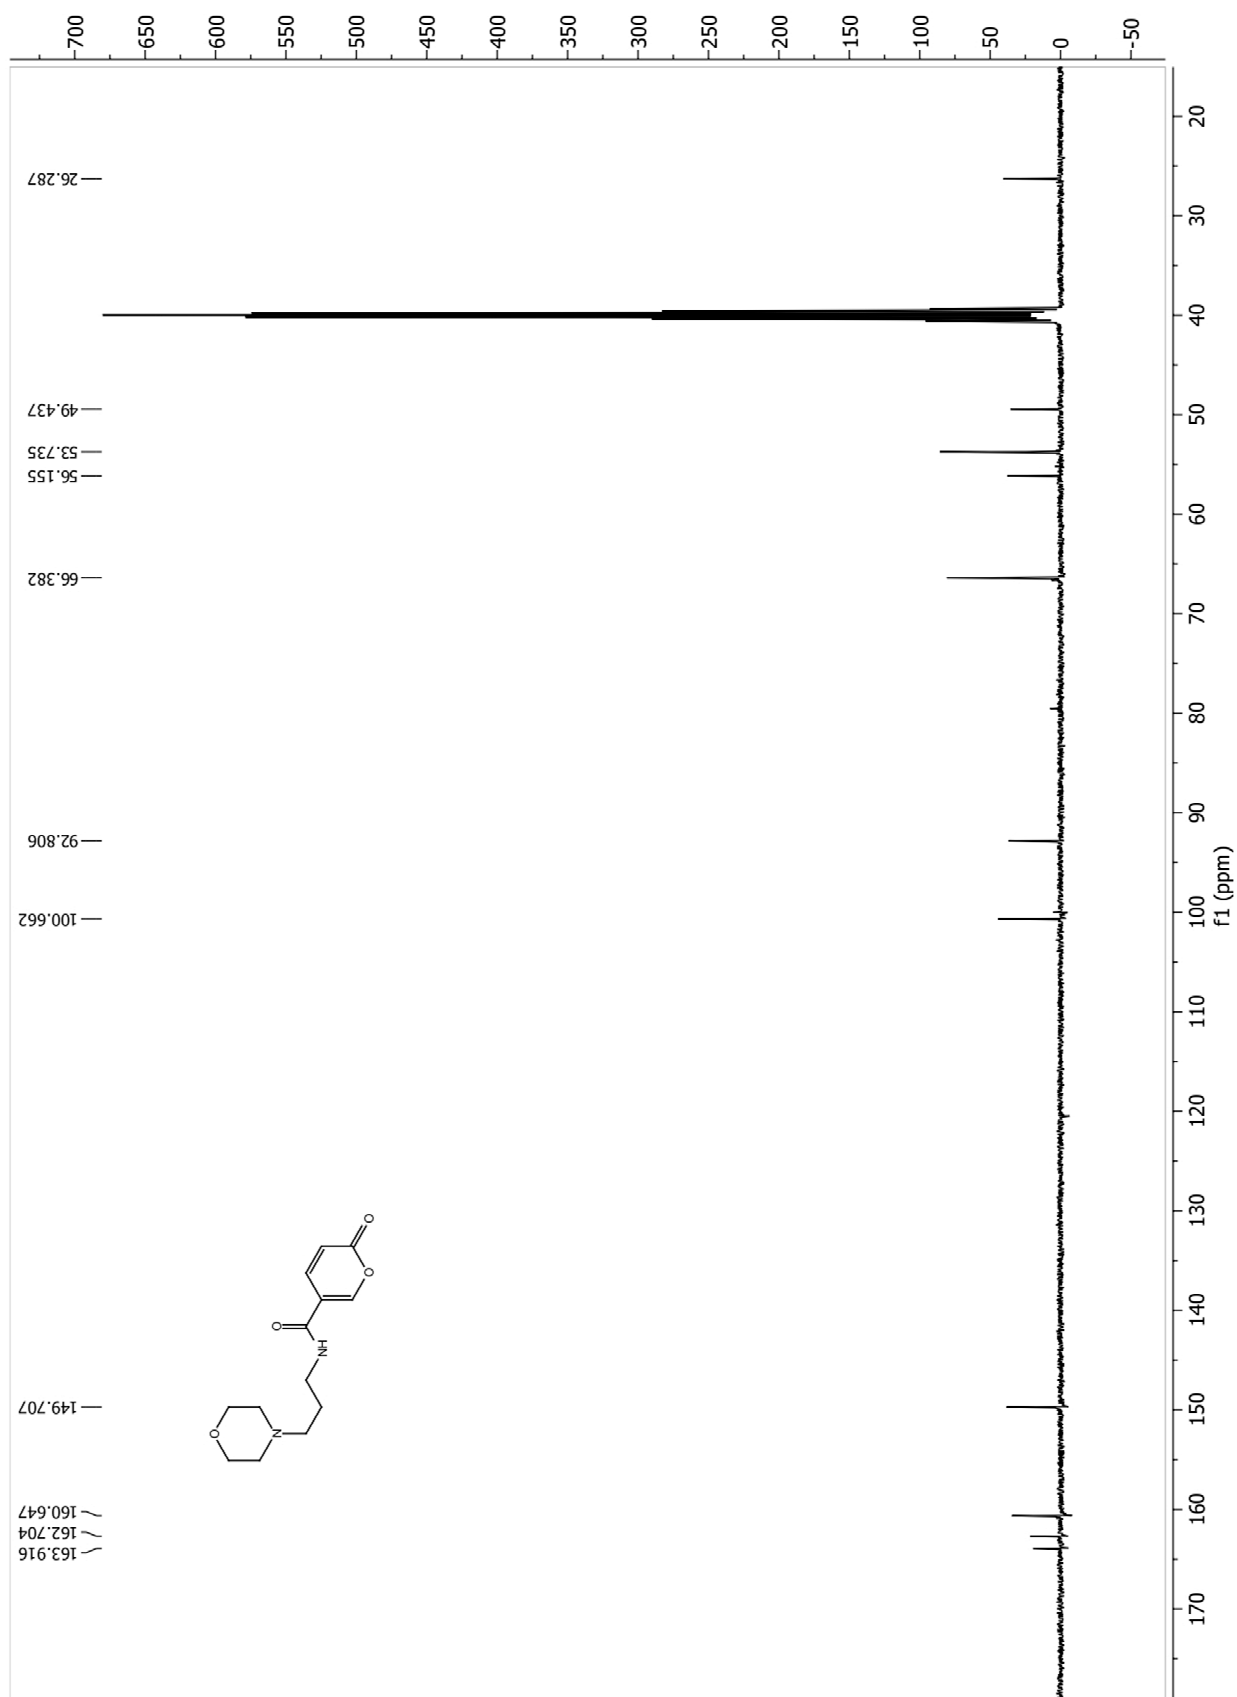

## HPLC chromatograms of compounds 2-15

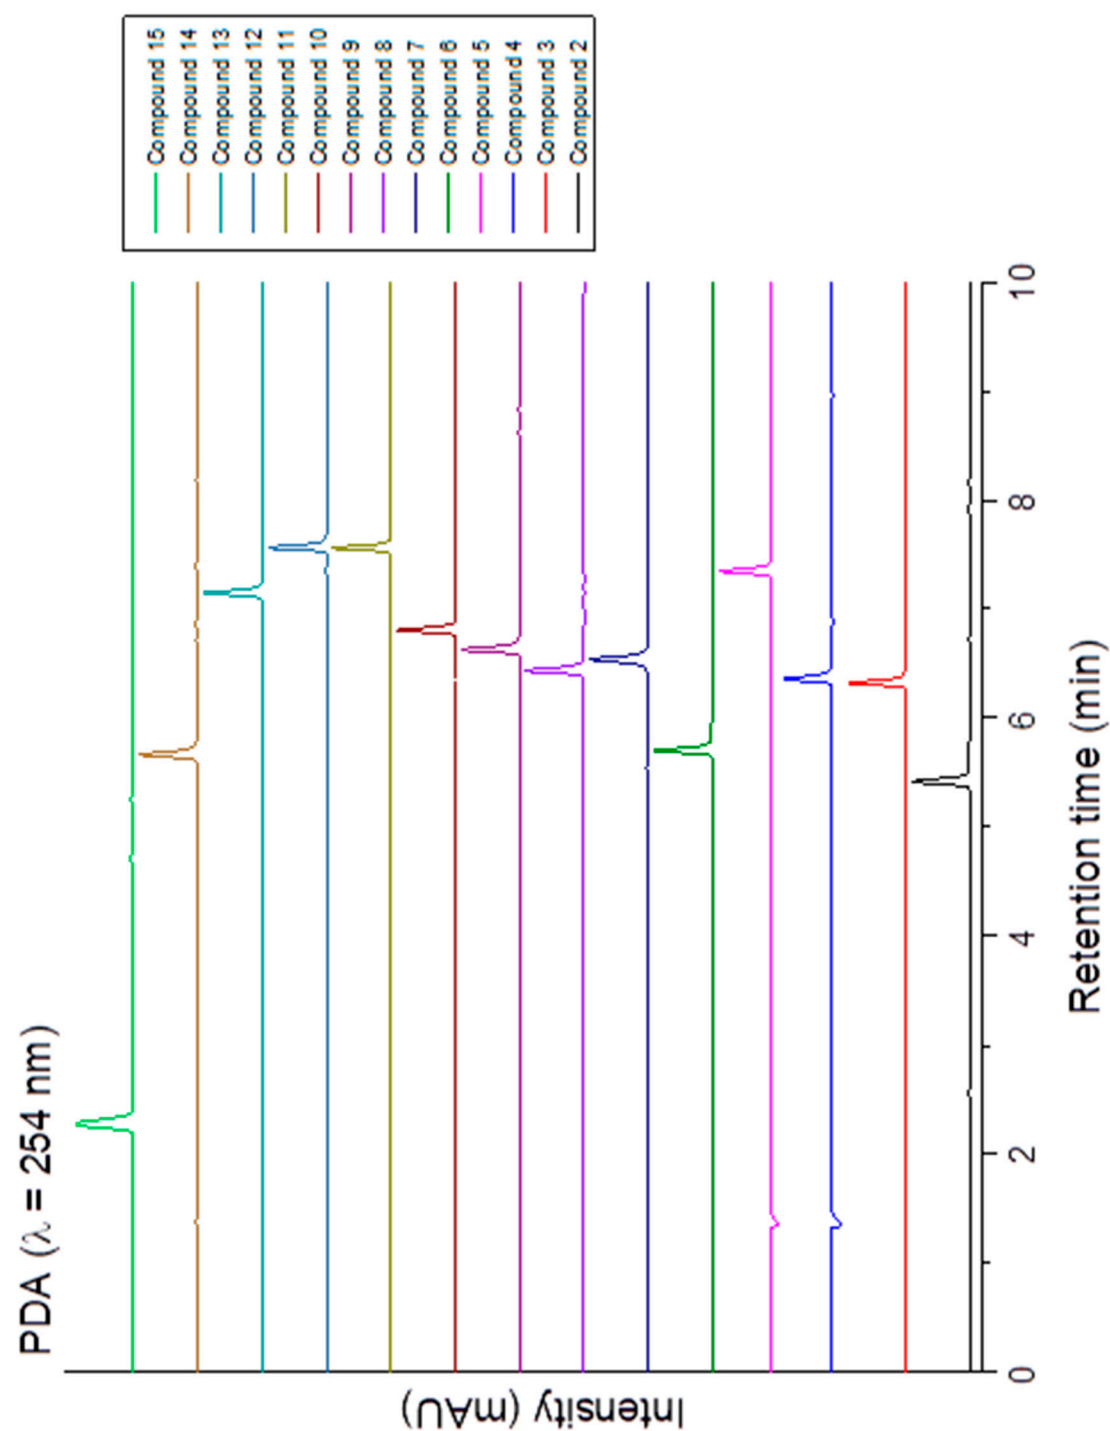

Enzyme inhibition curves of compounds 2-15

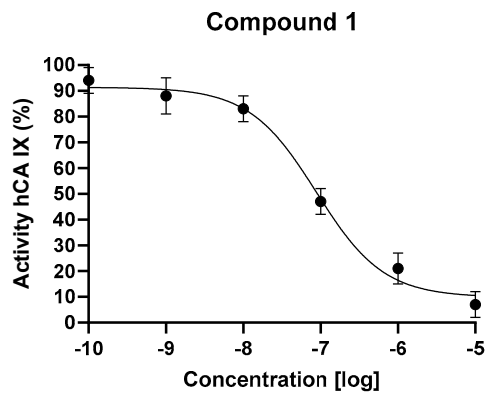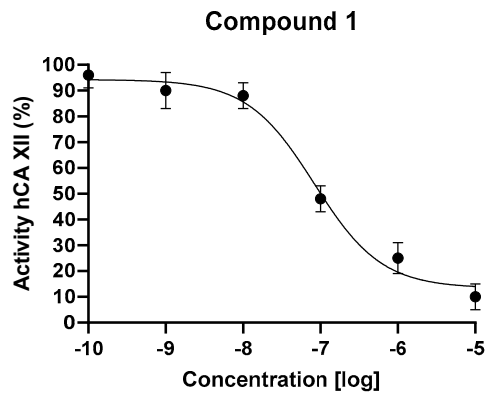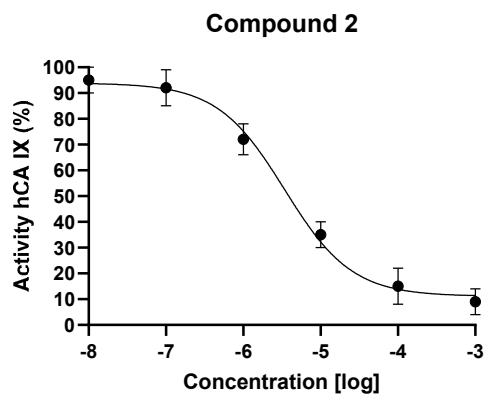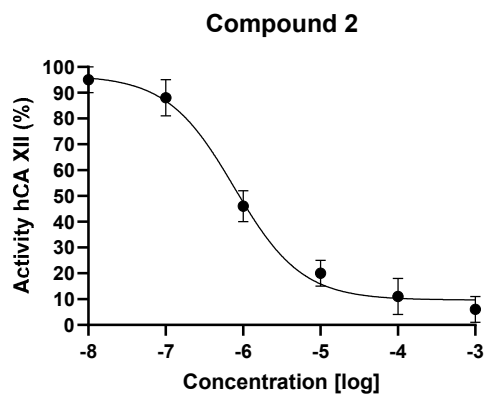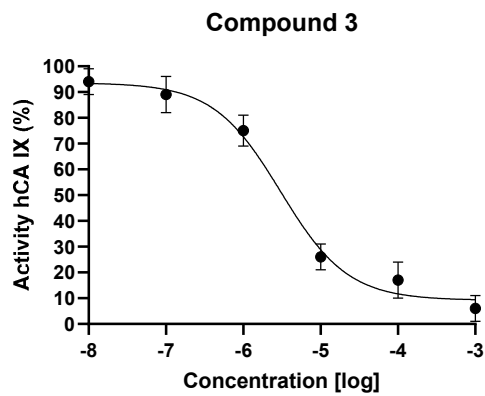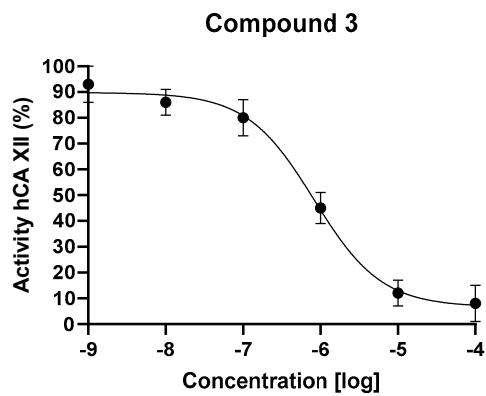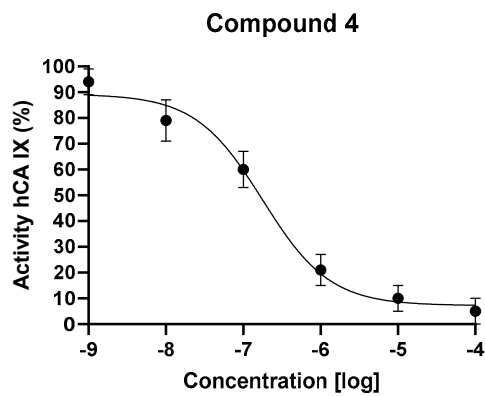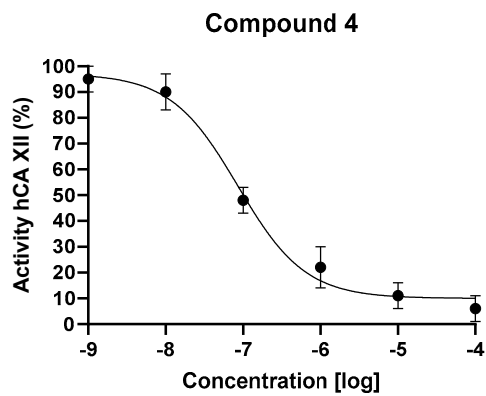

**Compound 9**

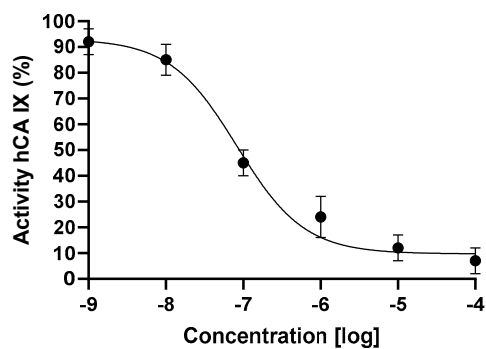

**Compound 9**

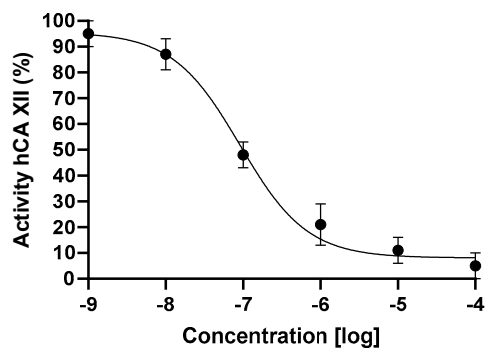

**Compound 10**

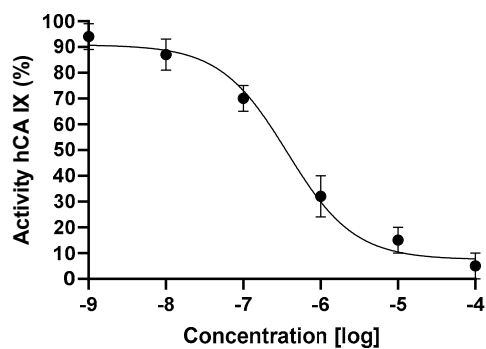

**Compound 10**

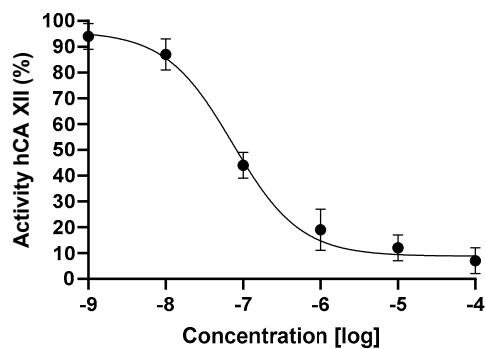

**Compound 11**

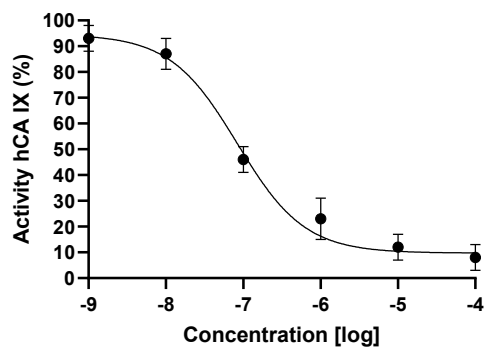

**Compound 11**

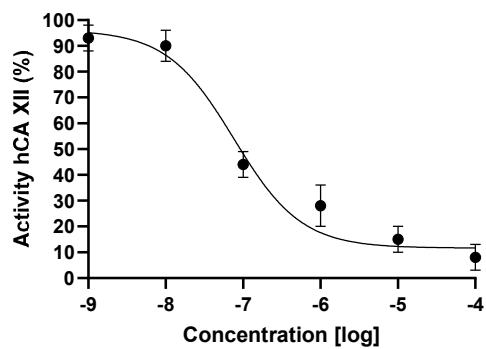

**Compound 12**

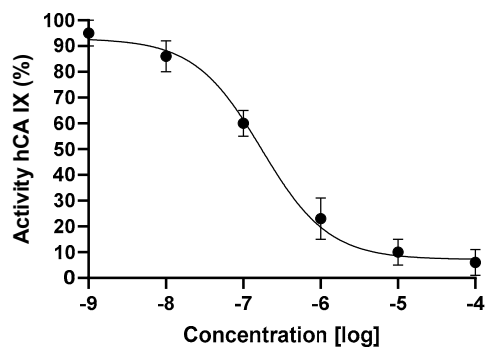

**Compound 12**

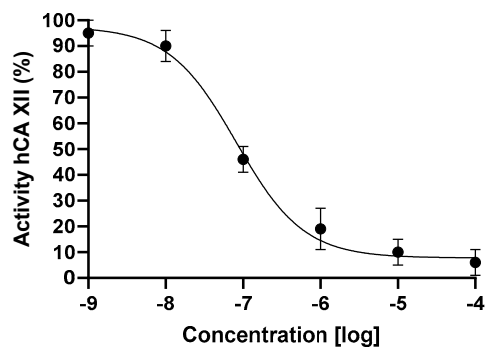



**Compound 13**

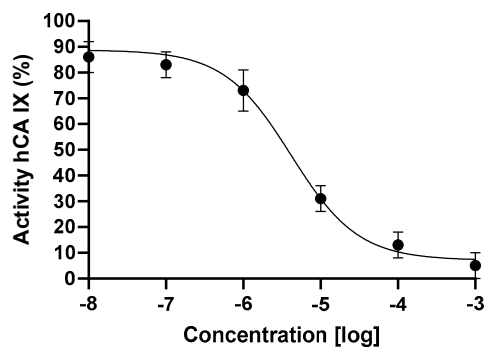

**Compound 13**

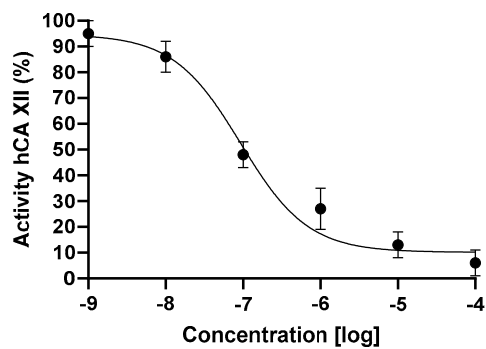

**Compound 14**

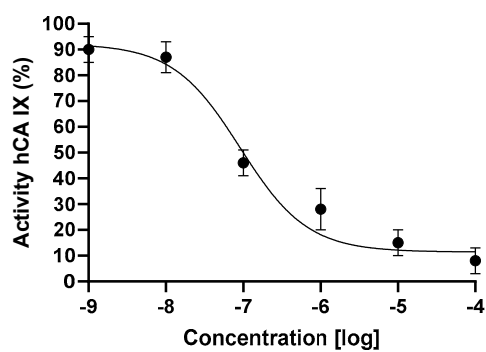

**Compound 14**

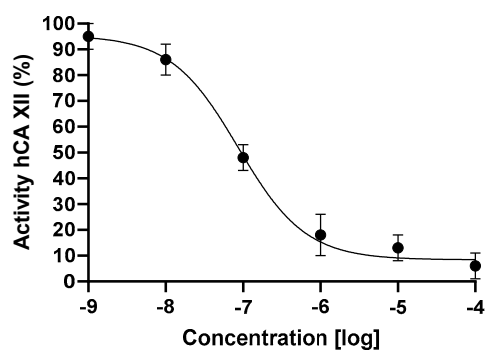

**Compound 15**

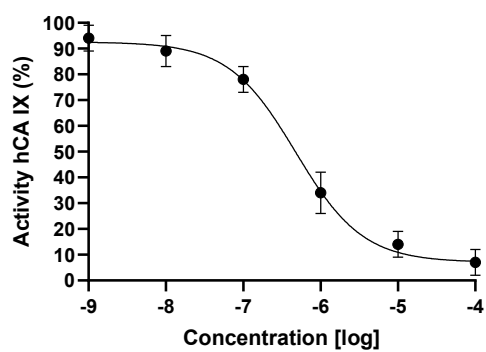

**Compound 15**

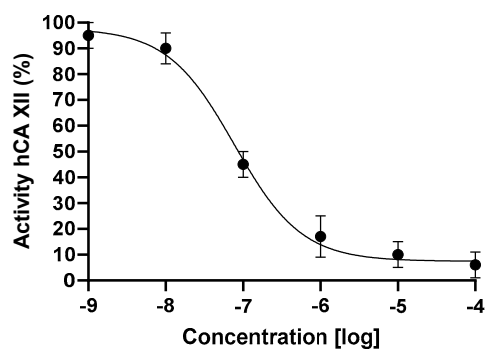

**Table S2.** Instrument parameters for exact mass determination

| <b>Positive Ion Mode</b> |                                                                                                                                                                                                                        |
|--------------------------|------------------------------------------------------------------------------------------------------------------------------------------------------------------------------------------------------------------------|
| <b><i>Compound</i></b>   | <b>Instrument parameters</b>                                                                                                                                                                                           |
| <b>7</b>                 | Spray Voltage ( kV ): 4.50, Sheath Gas Flow Rate: 7, Aux Gas Flow Rate: 0, Swe Gas Flow Rate: 0. Capillary Voltage (V): 30.00, Capillary Temperature: 270°C, T Lens voltage (V): 50.00, Skimmer Voltage (V): 22.00.    |
| <b>12</b>                | Spray Voltage ( kV ): 4.50, Sheath Gas Flow Rate: 7, Aux Gas Flow Rate: 0, Swe Gas Flow Rate: 0. Capillary Voltage (V): 67.50, Capillary Temperature: 270°C, T Lens voltage (V): 95.00, Skimmer Voltage (V): 20.00.    |
| <b>13</b>                | Spray Voltage ( kV ): 4.50, Sheath Gas Flow Rate: 7, Aux Gas Flow Rate: 0, Swe Gas Flow Rate: 0. Capillary Voltage (V): 32.50, Capillary Temperature: 270°C, T Lens voltage (V): 85.00, Skimmer Voltage (V): 24.00.    |
| <b>14</b>                | Spray Voltage ( kV ): 2.50, Sheath Gas Flow Rate: 7, Aux Gas Flow Rate: 0, Swe Gas Flow Rate: 0. Capillary Voltage (V): 60.00, Capillary Temperature: 270°C, T Lens voltage (V): 100.00, Skimmer Voltage (V): 32.00.   |
| <b>Negative Ion Mode</b> |                                                                                                                                                                                                                        |
| <b><i>Compound</i></b>   | <b>Instrument parameters</b>                                                                                                                                                                                           |
| <b>9</b>                 | Spray Voltage ( kV ): 2.50, Sheath Gas Flow Rate: 5, Aux Gas Flow Rate: 2, Swe Gas Flow Rate: 0. Capillary Voltage (V): -90.00, Capillary Temperature: 200°C, T Lens voltage (V): -90.00, Skimmer Voltage (V): -26.00. |
| <b>11</b>                | Spray Voltage ( kV ): 2.50, Sheath Gas Flow Rate: 5, Aux Gas Flow Rate: 2, Swe Gas Flow Rate: 0. Capillary Voltage (V): -90.00, Capillary Temperature: 200°C, T Lens voltage (V): -90.00, Skimmer Voltage (V): -26.00. |

**Table S2.** Purification conditions for compounds 2-15.

| Entry | Structure                                                                           | Purification method                                                                |                                                                              |
|-------|-------------------------------------------------------------------------------------|------------------------------------------------------------------------------------|------------------------------------------------------------------------------|
|       |                                                                                     | Chromatography                                                                     | Crystallization                                                              |
| 1     | 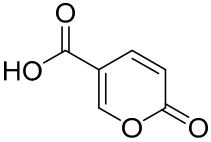   | Commercial                                                                         | /                                                                            |
| 2     |    | Stationary phase: silica gel<br>Mobile phase: ethyl acetate/cyclohexane (33% v/v)  |                                                                              |
| 3     |    | Stationary phase: silica gel<br>Mobile phase: ethyl acetate/cyclohexane (33% v/v). | Mixture of dichloromethane/cyclohexane (4:1 ratio v/v).                      |
| 4     |   | Stationary phase: silica gel<br>Mobile phase: ethyl acetate/cyclohexane (33% v/v). | Mixture of dichloromethane/cyclohexane (4:1 ratio v/v).                      |
| 5     |  | Stationary phase: silica gel<br>Mobile phase: ethyl acetate/cyclohexane (33% v/v). | Mixture of dichloromethane/cyclohexane (4:1 ratio v/v).                      |
| 6     |  | Stationary phase: silica gel<br>Mobile phase: ethyl acetate/cyclohexane (33% v/v). | Mixture of dichloromethane/cyclohexane (4:1 ratio v/v).                      |
| 7     |  | Stationary phase: silica gel<br>Mobile phase: ethyl acetate/cyclohexane (33% v/v). | Mixture of dichloromethane/cyclohexane (4:1 ratio v/v).                      |
| 8     |  | Stationary phase: silica gel<br>Mobile phase: ethyl acetate/cyclohexane (33% v/v). | Mixture of dichloromethane/cyclohexane (4:1 ratio v/v).                      |
| 9     |  | Stationary phase: silica gel<br>Mobile phase: ethyl acetate/cyclohexane (33% v/v)  | Mixture of dichloromethane/cyclohexane (4:1 ratio v/v). Performed two-times. |

|    |                                                                                     |                                                                                    |                                                                              |
|----|-------------------------------------------------------------------------------------|------------------------------------------------------------------------------------|------------------------------------------------------------------------------|
| 10 | 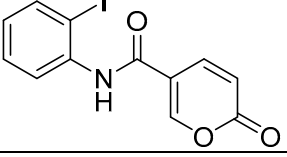   | Stationary phase: silica gel<br>Mobile phase: ethyl acetate/cyclohexane (33% v/v)  | Mixture of dichloromethane/cyclohexane (4:1 ratio v/v).                      |
| 11 |    | Stationary phase: silica gel<br>Mobile phase: ethyl acetate/cyclohexane (33% v/v). | Mixture of dichloromethane/cyclohexane (4:1 ratio v/v). Performed two-times. |
| 12 |    | Stationary phase: silica gel<br>Mobile phase: ethyl acetate/cyclohexane (33% v/v)  | Mixture of dichloromethane/cyclohexane (4:1 ratio v/v). Performed two-times. |
| 13 |    | Stationary phase: silica gel<br>Mobile phase: ethyl acetate/cyclohexane (33% v/v)  | Mixture of dichloromethane/cyclohexane (4:1 ratio v/v). Performed two-times. |
| 14 |   | Stationary phase: silica gel<br>Mobile phase: ethyl acetate/cyclohexane (33% v/v)  | Mixture of dichloromethane/cyclohexane (4:1 ratio v/v). Performed two-times. |
| 15 |  | Stationary phase: silica gel<br>Mobile phase: ethyl acetate/cyclohexane (33% v/v)  | Mixture of dichloromethane/cyclohexane (4:1 ratio v/v). Performed two-times. |

# High resolution mass analysis of compound 7

C:\Xcalibur\...\Secc\Compound7

6/23/2022 5:21:23 PM

Compound7 #1-19 RT: 0.02-0.26 AV: 19 NL: 2.07E8  
T: FTMS + p ESI Full ms [100.00-1000.00]

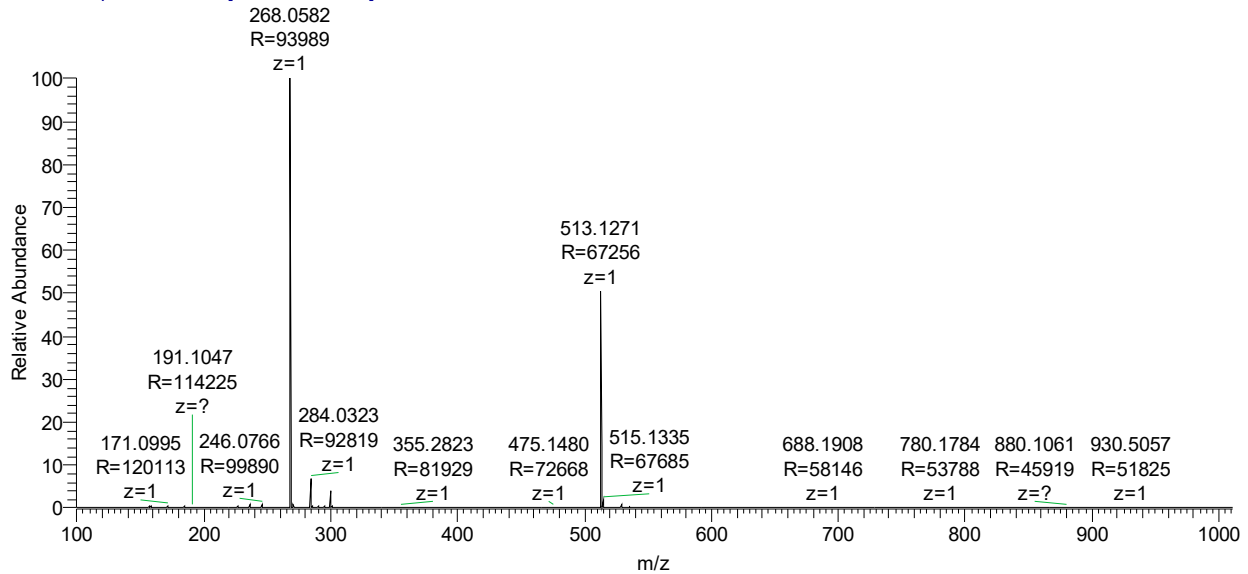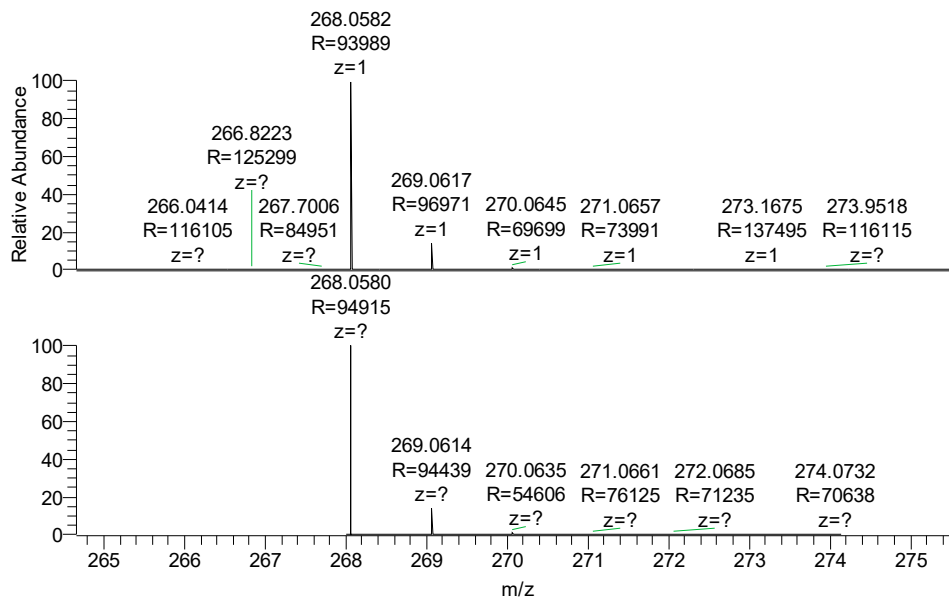

NL:  
2.07E8  
Compound7#1-19 RT:  
0.02-0.26 AV: 19 T: FTMS +  
p ESI Full ms  
[100.00-1000.00]

NL:  
2.01E4  
C<sub>13</sub> H<sub>11</sub> NO<sub>4</sub> +Na:  
C<sub>13</sub> H<sub>11</sub> N<sub>1</sub> O<sub>4</sub> Na<sub>1</sub>  
p (gss, s /p:40) Chrg 1  
R: 95000 Res .Pwr . @FWHM

# High resolution mass analysis of compound 9

C:\Xcalibur\...\Seccit\Compound9neg

6/23/2022 5:37:39 PM

Compound9neg #1-22 RT: 0.02-0.31 AV: 22 NL: 1.82E7  
T: FTMS - p ESI Full ms [100.00-1000.00]

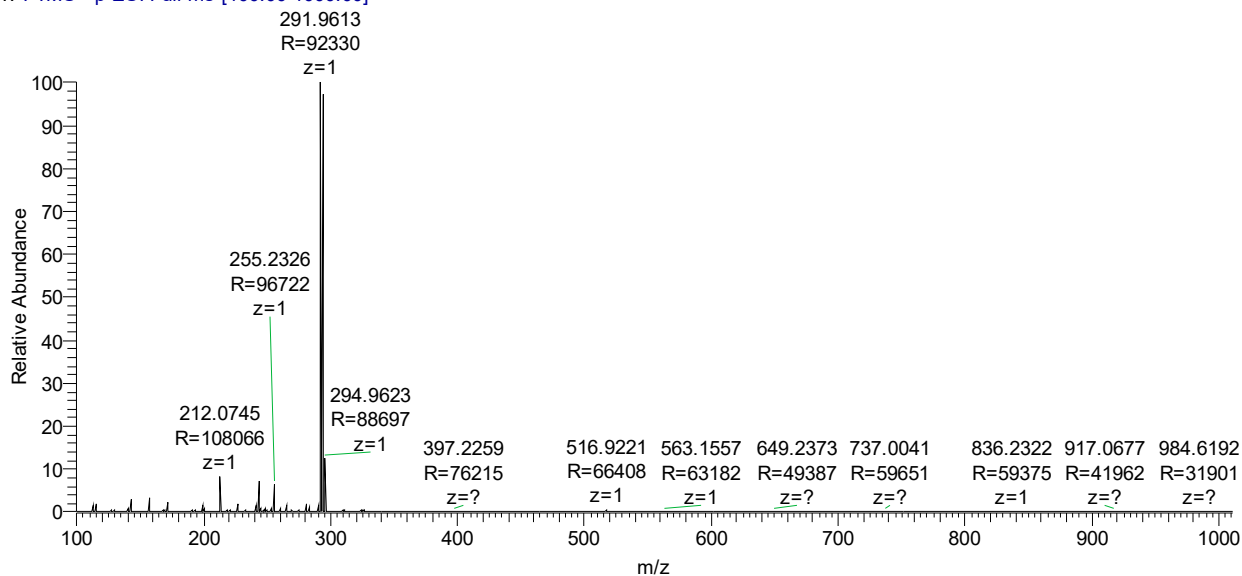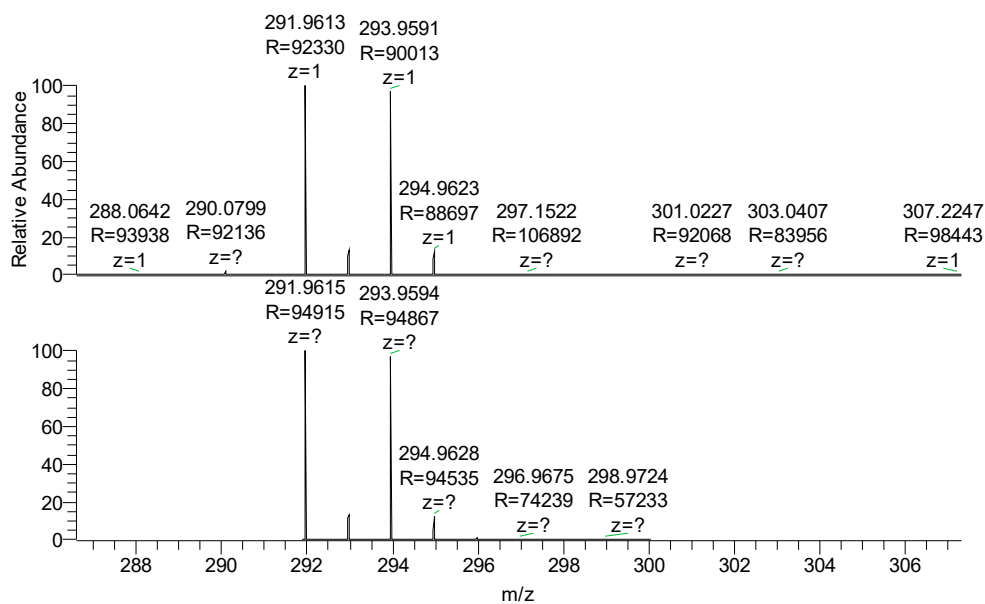

NL:  
1.82E7  
Compound9neg#1-22 RT:  
0.02-0.31 AV: 22 T: FTMS -  
p ESI Full ms  
[100.00-1000.00]

NL:  
1.03E4  
C<sub>12</sub>H<sub>8</sub>BrNO<sub>3</sub> + H:  
C<sub>12</sub>H<sub>7</sub>Br<sub>1</sub>N<sub>1</sub>O<sub>3</sub>  
p (gss, s /p:40) Chrg -1  
R: 95000 Res. Pwr. @FWHM

# High resolution mass analysis of compound 11

C:\Xcalibur\...\Secc\Compound11neg

6/23/2022 5:47:53 PM

Compound11neg #1-22 RT: 0.02-0.31 AV: 22 NL: 2.29E7

T: FTMS - p ESI Full ms [100.00-1000.00]

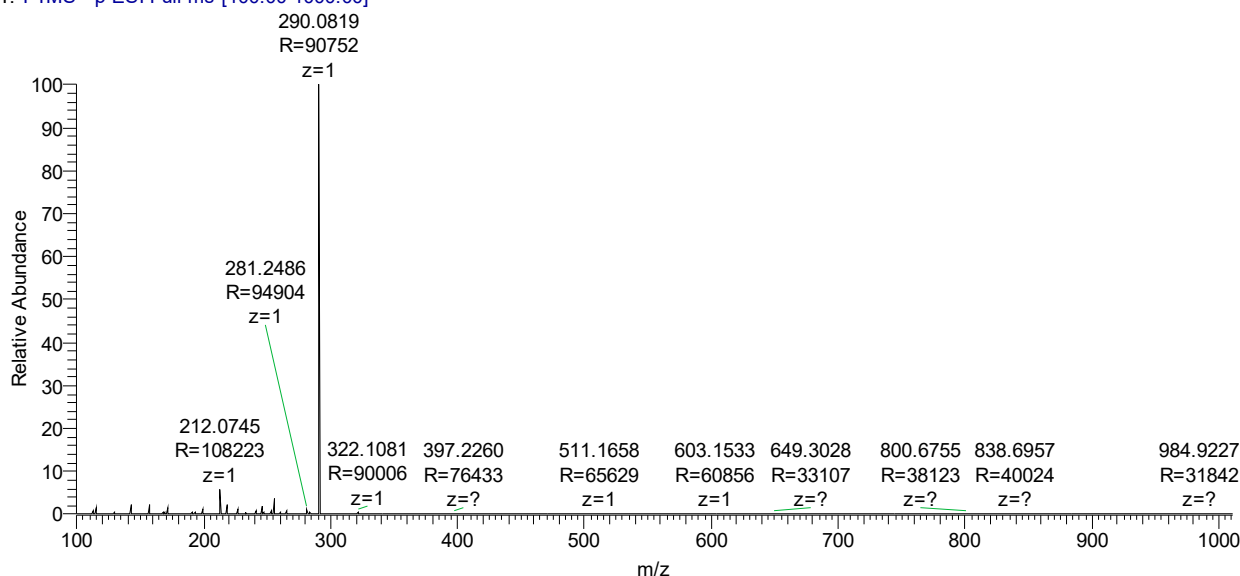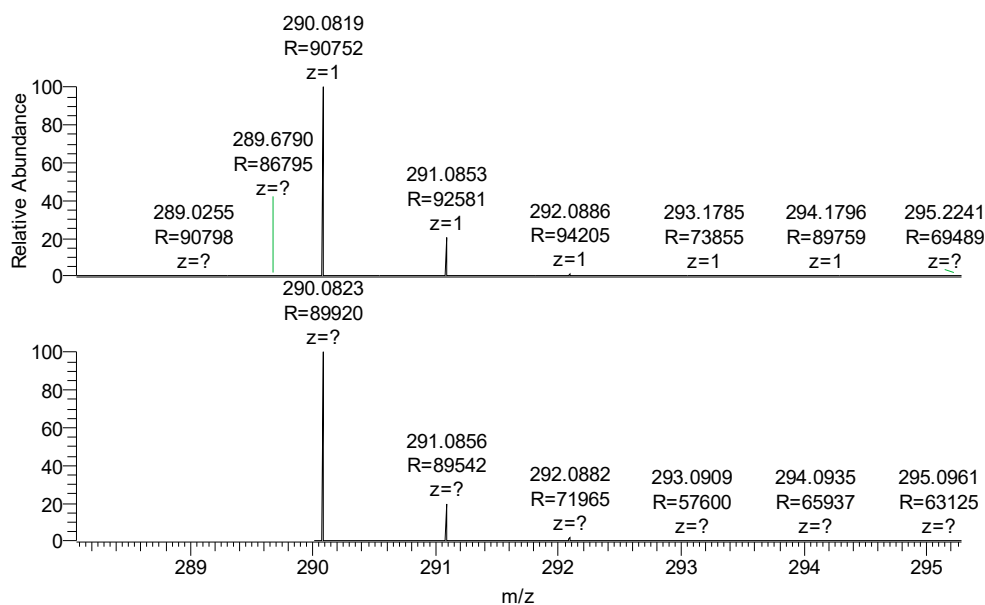

NL:  
2.29E7  
Compound11neg#1-22 RT:  
0.02-0.31 AV: 22 T: FTMS -  
p ESI Full ms  
[100.00-1000.00]

NL:  
1.91E4  
C<sub>8</sub>H<sub>8</sub>NO<sub>3</sub> +H:  
C<sub>8</sub>H<sub>2</sub>N<sub>1</sub>O<sub>3</sub>  
p (gss, s /p:40) Chrg -1  
R: 90000 Res. Pwr. @FWHM

# High resolution mass analysis of compound 12

C:\Xcalibur\...\Sec01\Compound12

6/23/2022 5:55:28 PM

Compound12 #2-23 RT: 0.03-0.32 AV: 22 NL: 9.14E7

T: FTMS + p ESI Full ms [100.00-1000.00]

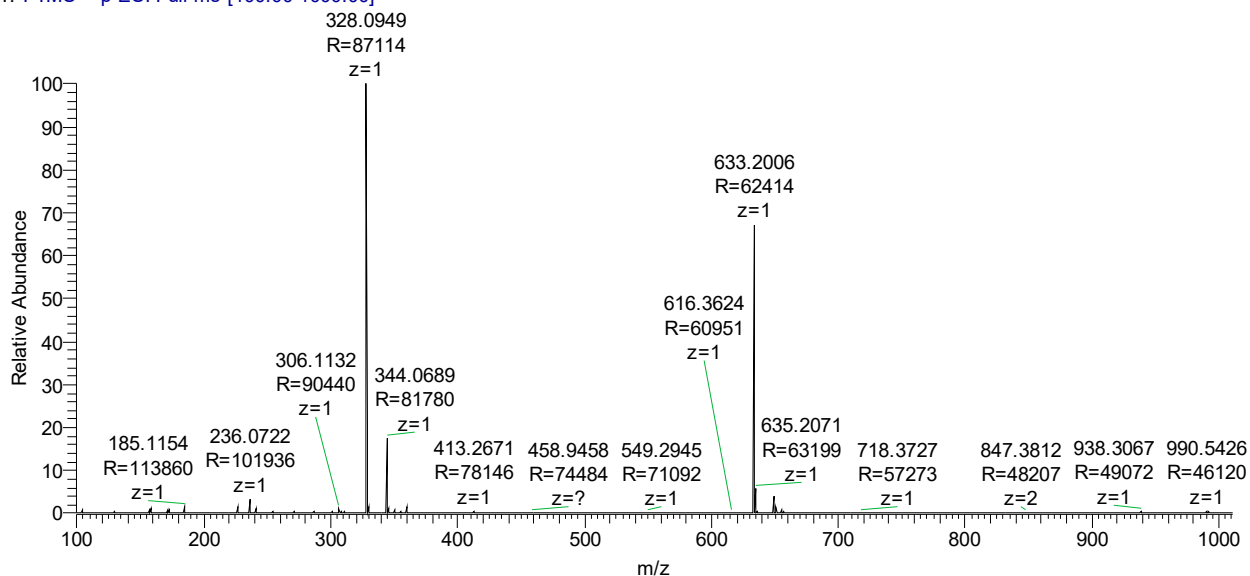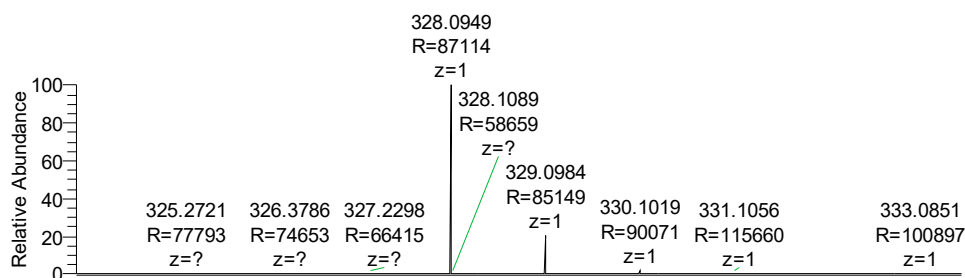

NL:

9.14E7

Compound12#2-23 RT:

0.03-0.32 AV: 22 T: FTMS +

p ESI Full ms

[100.00-1000.00]

NL:

1.89E4

C<sub>9</sub>H<sub>5</sub>NO<sub>3</sub>+Na:

C<sub>9</sub>H<sub>5</sub>N<sub>1</sub>O<sub>3</sub>Na<sub>1</sub>

p (gss, s /p:40) Chrg 1

R: 90000 Res .Pwr . @FWHM

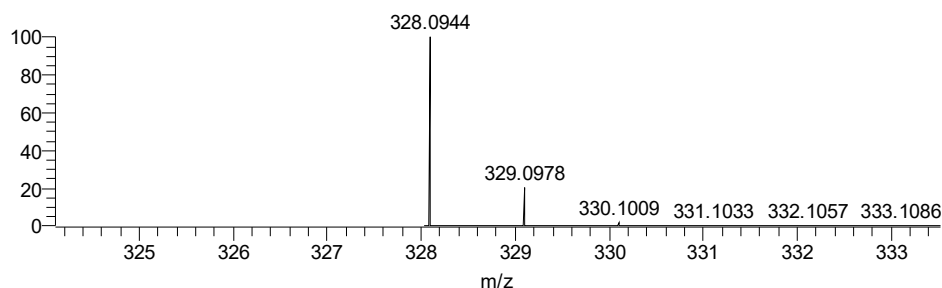



# High resolution mass analysis of compound 13

C:\Xcalibur\...\SeccilCompound13

6/23/2022 6:24:33 PM

Compound13 #2-24 RT: 0.03-0.33 AV: 23 NL: 1.45E7  
T: FTMS + p ESI Full ms [100.00-1000.00]

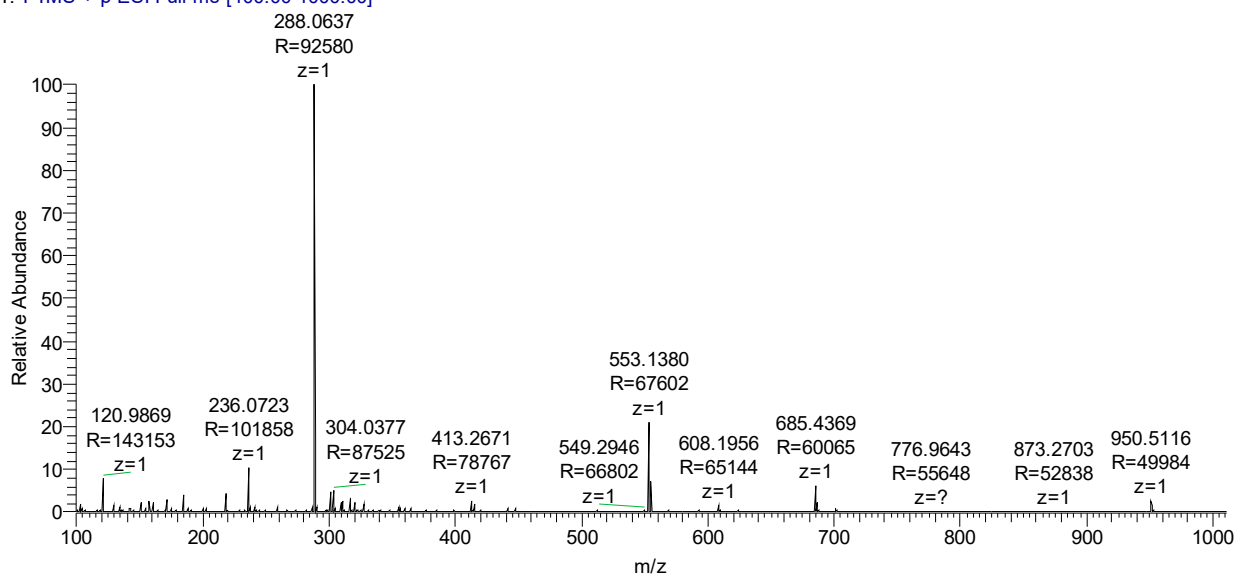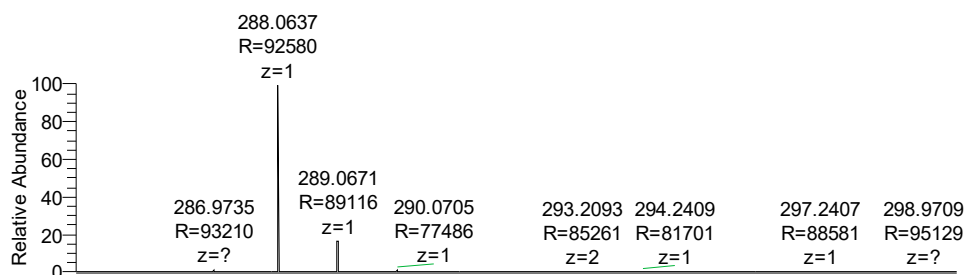

NL:  
1.45E7  
Compound13#2-24 RT:  
0.03-0.33 AV: 23 T: FTMS +  
p ESI Full ms  
[100.00-1000.00]

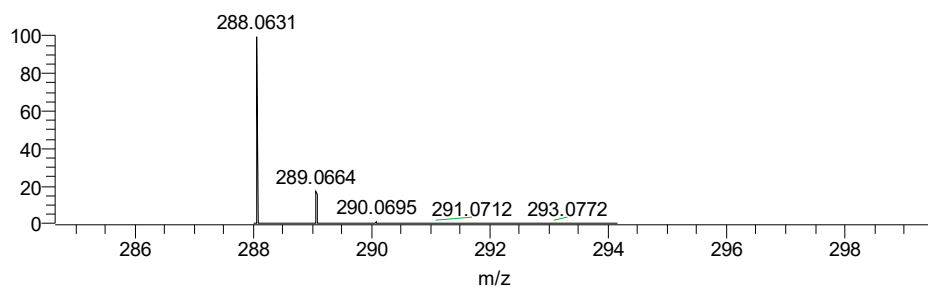

NL:  
1.95E4  
C<sub>16</sub>H<sub>11</sub>NO<sub>3</sub> +Na:  
C<sub>16</sub>H<sub>11</sub>N<sub>1</sub>O<sub>3</sub>Na<sub>1</sub>  
p (gss, s /p:40) Chrg 1  
R: 90000 Res .Pwr . @FWHM

# High resolution mass analysis of compound 14

C:\Xcalibur\...\Secc\Compound14

6/23/2022 6:35:15 PM

Compound14 #1-17 RT: 0.02-0.23 AV: 17 NL: 3.97E8  
T: FTMS + p ESI Full ms [100.00-1000.00]

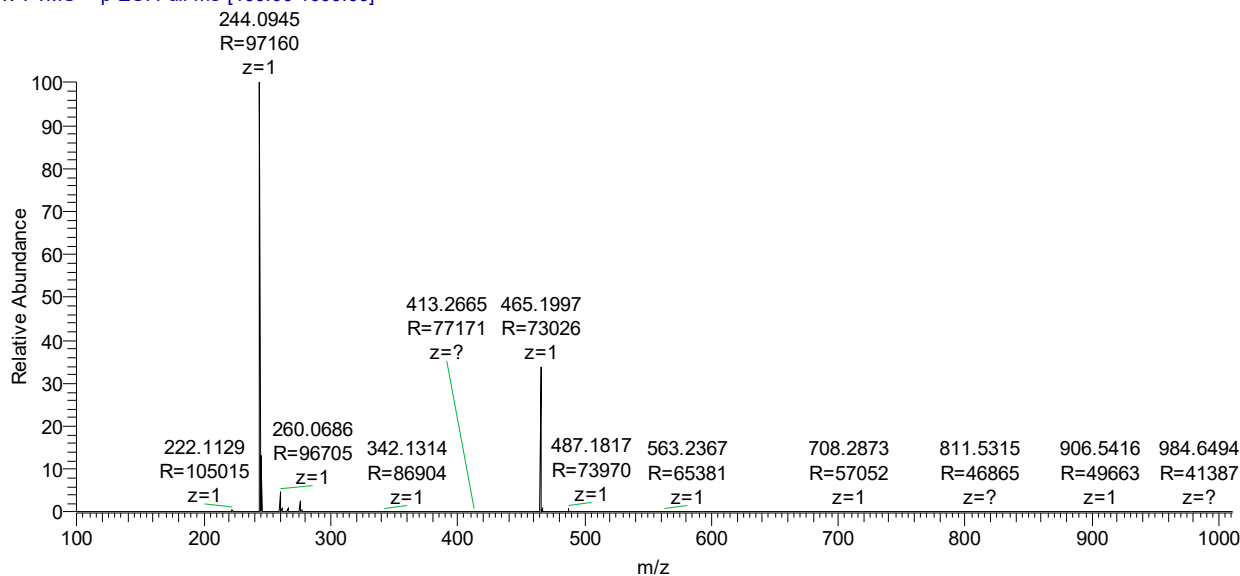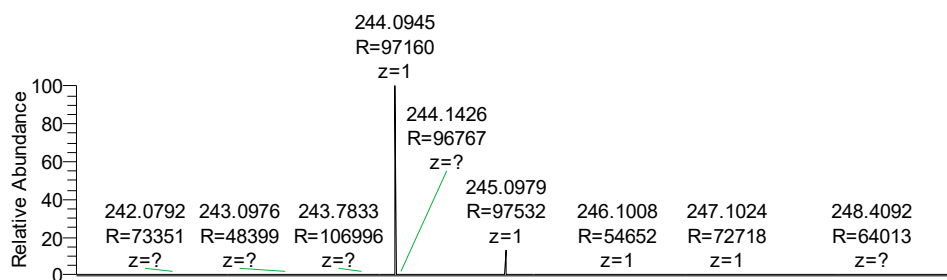

NL:  
3.97E8  
Compound14#1-17 RT:  
0.02-0.23 AV: 17 T: FTMS +  
p ESI Full ms  
[100.00-1000.00]

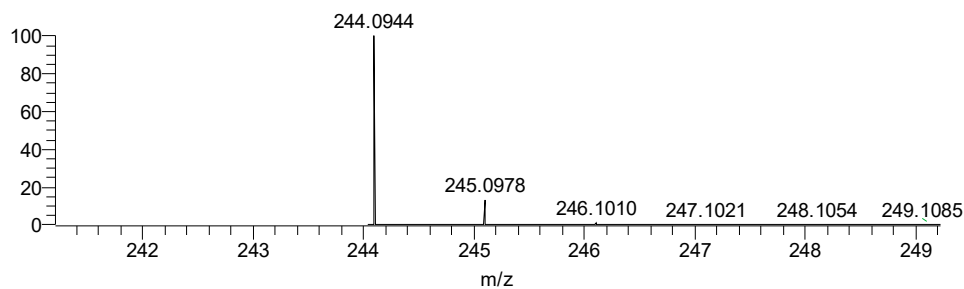

NL:  
2.04E4  
C<sub>12</sub>H<sub>5</sub>NO<sub>3</sub>+Na:  
C<sub>12</sub>H<sub>5</sub>N<sub>1</sub>O<sub>3</sub>Na<sub>1</sub>  
p (gss, s /p:40) Chrg 1  
R: 98000 Res. Pwr. @FWHM
